# Supplementary material
Source: publisher figshare collection journal article supplement (https://gsapubs.figshare.com/articles/dataset/_/12424871)
Supplement: Supplementary file 1 [file 1]

## Sheet: averages
Supplemental Table S3. Average pyroxene compositions.A71
sample		laboratory	SiO2	TiO2	Al2O3	Cr2O3	FeO	MnO	MgO	CaO	Na2O	K2O	Total	n	Si	Ti	Al	Cr	Fe3+	Fe2+	Mn	Mg	Ca	Na	K	Total	Aliv	Alvi	Fe3+/Fe2+	Mg/(Mg+Fet)	Mg/Mg+Fe2)	Mg+Fe2	R3+ (M1)		Wo	En	Fs (uses Fe2+)		Wo	En	Fs (uses Fet)
			wt%	wt%	wt%	wt%	wt%	wt%	wt%	wt%	wt%	wt%			apfu*	apfu	apfu	apfu	apfu	apfu	apfu	apfu	apfu	apfu	apfu		apfu	apfu
Western Hayfork terrane
KM7D	average	U.Wyo.	51.3083	0.576667	3.14833	nd	7.005	0.235	14.4733	21.5017	0.35	nd	98.5983	6	1.92161	0.0162573	0.138908	nd	0.0139937	0.205578	0.00746397	0.807992	0.862767	0.0254334	nd	4	0.0783928	0.0605155	0.0606387	0.787626	0.769933	1.01357	0.0745091		0.45976	0.430583	0.109657		0.456423	0.427443	0.116134
	1 sigma		0.457363	0.129443	0.461354		1.58325	0.0774059	0.43446	0.821592	0.0909212				0.0129216	0.0036786	0.0198967		0.0143837	0.0400568	0.00248307	0.0205037	0.0308884	0.00665822			0.0129216	0.0145833	0.0625379	0.0433132	0.00290274	0.0605605	0.00823696		0.0144683	0.00875471	0.0217388		0.0166364	0.011107	0.0264777
MMB672D	average	U.Wyo.	51.455	0.595	2.83	nd	6.35667	0.195	15.13	21.83	0.38	nd	98.7717	6	1.91614	0.0167297	0.12454	nd	0.0405416	0.158051	0.00616737	0.839492	0.87089	0.0274472	nd	4	0.0838586	0.0406815	0.338465	0.809277	0.842091	0.997543	0.0812231		0.466106	0.448942	0.0849527		0.456114	0.439451	0.104435
	1 sigma		1.37622	0.256239	0.909469		2.30746	0.0713559	1.30094	0.900907	0.141067				0.0380552	0.00731266	0.0409332		0.0336372	0.0681018	0.00229257	0.065209	0.0287413	0.010134			0.0380552	0.0133064	0.354899	0.0692225	0.0669112	0.133311	0.0282872		0.0110593	0.0280642	0.0373631		0.0106614	0.0295342	0.0395958
BL116B	average	U.Wyo.	52.5767	0.26	2.015	nd	4.39833	0.151667	16.21	22.8517	0.346667	nd	98.81	6	1.94228	0.00723247	0.087806	nd	0.041105	0.0949584	0.00475571	0.892472	0.904519	0.0248763	nd	4	0.0577246	0.0300814	0.515171	0.867581	0.903404	0.98743	0.0711864		0.478277	0.471333	0.05039		0.467939	0.461477	0.0705838
	1 sigma		0.806963	0.0690411	0.485172		1.63802	0.0919088	1.10511	0.44868	0.172884				0.0245742	0.00194988	0.0214154		0.0353406	0.0331325	0.00291359	0.0570383	0.0168936	0.0125422			0.0245742	0.0122241	0.551865	0.0509108	0.0361624	0.0901708	0.0302696		0.0110257	0.0211738	0.0185473		0.0085329	0.0259459	0.0274265
KM37C	average	U.Wyo.	51.8933	0.403333	2.66333	nd	5.95333	0.18	15.9467	21.4933	0.33	nd	98.8633	3	1.92355	0.011261	0.116399	nd	0.0377105	0.14697	0.0056582	0.881123	0.853601	0.0237294	nd	4	0.0764509	0.0399477	0.249175	0.827095	0.857137	1.02809	0.0776582		0.453736	0.468021	0.0782428		0.444776	0.458916	0.0963081
	1 sigma		0.979807	0.186607	1.06262		1.43532	0.0828654	0.791889	0.609608	0.0616441				0.0330398	0.00522262	0.0465234		0.0172478	0.0314536	0.00261699	0.0416205	0.0222156	0.00449187			0.0330398	0.0165441	0.105714	0.0397288	0.0290278	0.073074	0.0266099		0.0128241	0.0136391	0.0171751		0.0127224	0.0177084	0.0236165
RU 175	average	USGS	49.9378	0.544833	3.3385	0.00783333	7.8225	0.391667	13.9212	21.842	0.569833	nd	98.3762	6	1.8769	0.0154078	0.147956	0.000232641	0.108745	0.137191	0.0124779	0.779863	0.879678	0.0415491	nd	4	0.1231	0.0248561	0.839681	0.76023	0.851376	0.917054	0.133834		0.489771	0.43389	0.0763394		0.461598	0.409249	0.129153
	1 sigma		0.585849	0.100107	0.431512	0.00862973	0.68654	0.109267	0.72163	1.09405	0.0991017				0.0120799	0.00284071	0.0196345	0.000256648	0.0192608	0.0287806	0.00349767	0.0367477	0.0451314	0.0073138		0	0.0120799	0.0106787	0.265038	0.0187226	0.023137	0.0655283	0.0159518		0.0275615	0.0155878	0.0160099		0.0224169	0.0184391	0.0125325
RU177	average	USGS	52.0409	0.49375	3.13525	0.01725	8.48813	0.339875	14.5841	20.7792	0.323625	nd	100.202	8	1.92511	0.0137289	0.136477	0.000503545	0.0143166	0.248323	0.0106592	0.80429	0.823387	0.0232038	nd	4	0.074889	0.0615882	0.0797525	0.754435	0.765817	1.05261	0.0764083		0.439335	0.428611	0.132054		0.435716	0.425402	0.138883
	1 sigma		0.90643	0.154505	1.22855	0.0237579	1.07002	0.106939	0.532328	1.01437	0.0368678				0.0411763	0.00427503	0.052651	0.000692743	0.0233578	0.0458255	0.00337701	0.0314414	0.0369945	0.00260285			0.0411763	0.0161367	0.15766	0.0239219	0.0325961	0.077267	0.0362236		0.0268839	0.0109625	0.0231016		0.0222559	0.0142027	0.0172666
RU-89B	average	USGS	52.7016	0.356	2.8252	0.0821	7.6569	0.2333	15.8647	20.6399	0.2304	nd	100.59	10	1.93089	0.0098345	0.121918	0.00236434	0.0143767	0.22082	0.00726128	0.866394	0.809752	0.0163883	nd	4	0.0691085	0.0528093	0.0770719	0.789197	0.800084	1.08721	0.0695503		0.426995	0.456645	0.11636		0.423667	0.453246	0.123087
	1 sigma		0.802903	0.107255	0.808461	0.06083	2.28288	0.0855629	0.60352	1.76995	0.039251				0.0258588	0.00302649	0.0345365	0.00174427	0.0127856	0.074531	0.00272199	0.0287429	0.0634508	0.00291791			0.0258588	0.0107739	0.0819122	0.0530319	0.0551457	0.103274	0.0202808		0.0348423	0.0114058	0.0390763		0.0333034	0.0132947	0.0377537
RU-182	average	USGS	51.094	0.698875	3.84713	0.0035	8.30712	0.27325	14.4166	21.1034	0.365625	nd	100.109	8	1.88977	0.0194497	0.167726	0.000102292	0.0399487	0.217022	0.00855952	0.794871	0.836327	0.0262217	nd	4	0.110228	0.0574989	0.189436	0.755553	0.785657	1.01189	0.0975499		0.45268	0.429944	0.117376		0.443007	0.420884	0.136109
	1 sigma		0.717253	0.141787	0.753772	0.00396412	0.593851	0.0498362	0.667197	0.527167	0.043418				0.0243394	0.00395816	0.0329487	0.000115883	0.015373	0.0219157	0.00155331	0.0357259	0.0212753	0.0031293			0.0243394	0.0112902	0.0827845	0.0180531	0.0181878	0.0436001	0.0203421		0.016583	0.0144144	0.0112583		0.0138971	0.0160872	0.00999485
RU88	average	USGS	50.9047	0.460067	2.69607	0.0600667	9.17407	0.273933	15.7642	19.0913	0.253133	nd	98.6775	14	1.9061	0.0129736	0.118916	0.00177266	0.0595638	0.228057	0.00870097	0.879886	0.765638	0.0183949	nd	4	0.0939025	0.0250137	0.29186	0.754917	0.795891	1.10794	0.0863501		0.408708	0.469604	0.121688		0.396084	0.455103	0.148813
	1 sigma		0.457574	0.098965	0.510177	0.0356454	1.56465	0.0611375	0.585785	1.44784	0.0385173				0.016002	0.00282693	0.0221005	0.00104372	0.0147317	0.0539687	0.00197286	0.0301499	0.0532748	0.00289113			0.016002	0.0117884	0.141547	0.0362896	0.0423889	0.0841186	0.0152808		0.0290965	0.0148302	0.0286559		0.0278521	0.0135975	0.0262614
RU210 matrix	average	USGS	51.1943	0.519	3.05605	0.152318	6.76768	0.2005	15.6655	21.6932	0.294727	0.0223636	99.5657	21	1.89015	0.0144688	0.133124	0.0044087	0.0754459	0.134199	0.00629462	0.86191	0.857794	0.0211533	0.00105485	4	0.109854	0.0232702	0.708628	0.806074	0.867217	0.996109	0.103125		0.462683	0.464677	0.0726407		0.444516	0.44658	0.108904
	1 sigma		1.05317	0.228116	0.858439	0.16741	2.24829	0.0893399	0.977454	1.40748	0.0952161	0.00607936			0.0277645	0.00643333	0.0375954	0.00482131	0.020708	0.0670403	0.00285305	0.0462198	0.048188	0.00697288	0.000293511		0.0277645	0.0145947	0.317427	0.060647	0.0611173	0.11326	0.0237882		0.0243725	0.0180435	0.0363554		0.0230864	0.020299	0.0375255
RU210 clast	average	USGS	49.3002	0.66925	5.16538	0.19325	6.78112	0.149	14.4811	22.0437	0.30825	0.01875	99.1101	8	1.83148	0.0187158	0.226215	0.0056638	0.0908335	0.119945	0.00469055	0.80191	0.877445	0.0222148	0.000888187	4	0.16852	0.0576943	0.764451	0.791873	0.869795	0.921854	0.154192		0.487717	0.445568	0.0667151		0.464239	0.424218	0.111543
	1 sigma		0.714586	0.154323	0.63135	0.175597	0.831321	0.0347491	0.57277	0.319041	0.0645557	0.00882822			0.0216395	0.00434923	0.0279145	0.00514052	0.0168297	0.0162498	0.00109969	0.0288365	0.011598	0.00470961	0.000416913		0.0216395	0.00963947	0.147247	0.0254829	0.017759	0.0450863	0.0169374		0.00801805	0.01107	0.00934916		0.00656185	0.0136112	0.0141169
Ru47B	average	USGS	52.9096	0.261788	2.5257	0.297061	6.62488	0.198273	17.3277	19.6954	0.225727	0.0233939	100.089	32	1.93403	0.0072001	0.108813	0.00858566	0.0176284	0.184916	0.00613979	0.944233	0.771361	0.0159995	0.00109077	4	0.0659678	0.0428456	0.0980397	0.82351	0.836388	1.12915	0.0690597		0.405864	0.496832	0.097304		0.402132	0.49226	0.105607
	1 sigma		0.360821	0.0458738	0.42142	0.0913196	0.539887	0.0192987	0.310462	0.618879	0.0282073	0.0107279			0.0109714	0.00126846	0.0181784	0.00263899	0.0101483	0.0176588	0.000608747	0.0164391	0.0235152	0.00201477	0.000499676		0.0109714	0.0105804	0.0588121	0.0124526	0.0133872	0.0340979	0.00988094		0.0119212	0.00813111	0.00933134		0.0118254	0.0078254	0.00889139
Ru203	average	USGS	51.1952	0.480382	3.215	0.0478235	7.05397	0.219529	15.478	21.4123	0.264	0.0227941	99.389	33	1.8957	0.0133944	0.140242	0.00139209	0.0602374	0.158455	0.00689805	0.854309	0.849323	0.0189756	0.00107708	4	0.104304	0.0359382	0.429945	0.797008	0.844788	1.01276	0.0975677		0.45627	0.458658	0.0850724		0.441876	0.444328	0.113796
	1 sigma		0.725228	0.136851	0.861543	0.0558493	1.41178	0.0745943	0.657675	1.03121	0.0678706	0.00741929			0.0266584	0.00383869	0.0373666	0.00161832	0.0159506	0.0451323	0.00237222	0.033761	0.0362894	0.00493904	0.000351626		0.0266584	0.0131232	0.203295	0.0371218	0.0393905	0.0788933	0.0226641		0.0219811	0.0129989	0.023952		0.0198158	0.0148248	0.0232722
RU129B	average	USGS	51.5652	0.451929	2.49071	0.0379286	9.089	0.283429	15.6425	19.7271	0.237429	0.019	99.5442	14	1.91601	0.0126422	0.109024	0.00110811	0.0505722	0.232107	0.00892898	0.866442	0.78515	0.0171115	0.000901054	4	0.0839881	0.0250359	0.246875	0.756287	0.79163	1.09855	0.0767162		0.416953	0.459958	0.123089		0.405988	0.44793	0.146082
	1 sigma		0.41568	0.0872439	0.536328	0.049501	1.9879	0.0756918	0.291324	1.5984	0.0247349	0.0061062			0.0143421	0.00248576	0.0232094	0.00144209	0.00855838	0.0658233	0.00240707	0.0137797	0.0604865	0.00183138	0.000289998		0.0143421	0.0104578	0.108292	0.0423692	0.0486838	0.0796029	0.0146769		0.0337625	0.00585802	0.0344587		0.032118	0.00591594	0.0320606
RU175	average	USGS	51.561	0.298286	2.82171	0.234857	4.30614	0.101286	16.0806	23.0511	0.219571	0.0232857	98.6979	7	1.90758	0.00831377	0.12324	0.00684258	0.0549817	0.0784667	0.00317701	0.886746	0.913787	0.0157619	0.00109898	4	0.0924155	0.0308246	0.672297	0.868752	0.918037	0.965213	0.0926488		0.486531	0.471546	0.0419233		0.472511	0.458374	0.0691145
	1 sigma		1.25622	0.121372	1.0966	0.247467	1.31116	0.0139152	1.03014	0.347586	0.0381346	0.00511899			0.0370755	0.00340566	0.0482743	0.00720372	0.0274767	0.0152096	0.000456784	0.0528556	0.00829044	0.00280492	0.000240407		0.0370755	0.0120218	0.241069	0.0420438	0.0189858	0.0680652	0.0323848		0.0114006	0.0188039	0.00894753		0.00516868	0.0248617	0.021783
Ru217	average	USGS	50.4036	0.434429	3.58279	0.138071	7.454	0.203714	15.2789	20.9846	0.244429	0.0235	98.7481	14	1.88018	0.012204	0.157413	0.00405833	0.0725749	0.160311	0.00645301	0.849571	0.838421	0.0176957	0.00111834	4	0.11982	0.0375929	0.536611	0.786976	0.844652	1.00988	0.114226		0.454071	0.459476	0.0864525		0.436721	0.442171	0.121109
	1 sigma		0.958515	0.101242	1.20489	0.134958	1.84191	0.0924349	0.675467	1.53188	0.0424259	0.00415331			0.0358709	0.00289743	0.0527386	0.00397105	0.0164737	0.0626037	0.0029714	0.0356165	0.0573134	0.00317795	0.000198077		0.0358709	0.0183417	0.255379	0.0414396	0.0492695	0.0982202	0.0323474		0.0363428	0.0125628	0.0330447		0.0329629	0.0151645	0.0301337
Or55C	average	USGS	50.558	0.539117	3.8553	0.151033	7.3984	0.179467	15.4333	21.0065	0.3514	0.02265	99.4952	44	1.86911	0.0150129	0.168155	0.00440318	0.0857393	0.143192	0.00562483	0.850427	0.832066	0.0252063	0.00106839	4	0.130893	0.0372614	0.616375	0.788125	0.855734	0.993618	0.127404		0.455772	0.465607	0.0786215		0.435289	0.444802	0.119909
	1 sigma		1.08561	0.159918	0.919448	0.146958	1.39851	0.0406999	0.813121	0.656837	0.0662581	0.0053598			0.0323009	0.00447942	0.0405153	0.00424918	0.0276799	0.0281016	0.0012956	0.0402407	0.0225997	0.00480742	0.000252677		0.0323009	0.0140572	0.230171	0.0396776	0.0282928	0.0683423	0.0276057		0.00916171	0.0139367	0.015845		0.00999758	0.0177315	0.0233158
OR-54D	average	USGS	52.8697	0.0799697	2.34491	0.738515	4.64773	0.142424	18.2449	21.1532	0.125788	nd	100.347	32	1.9157	0.00218131	0.10017	0.0211567	0.0517573	0.0891214	0.00437274	0.985515	0.821192	0.00883805	nd	4	0.0837313	0.0164382	0.651534	0.875144	0.91748	1.07464	0.0893522		0.433162	0.519817	0.047021		0.421615	0.506019	0.072366
	1 sigma		0.437525	0.0252568	0.454314	0.160471	0.708618	0.0245122	0.383034	0.770069	0.0136199				0.0124538	0.000693489	0.019513	0.0046041	0.0146039	0.0246884	0.00076147	0.0190065	0.0283394	0.000965774			0.0130494	0.0097468	0.321363	0.0174345	0.0210254	0.0436949	0.0122055		0.0147744	0.00842679	0.0130458		0.0133117	0.00917521	0.0113338
OR-55A	average	USGS	52.8922	0.0981304	2.20857	0.607087	5.2487	0.167565	18.0847	20.4803	0.144913	nd	99.9323	22	1.92748	0.00269081	0.0948708	0.017488	0.0379288	0.122034	0.00517193	0.982467	0.799627	0.0102387	nd	4	0.0725055	0.0223653	0.334652	0.860229	0.889801	1.1045	0.0777821		0.419956	0.515966	0.0640776		0.411767	0.505872	0.0823603
	1 sigma		0.32824	0.0317357	0.352497	0.150124	0.610941	0.0272841	0.397742	0.76338	0.0367635				0.0114037	0.000871691	0.0152348	0.00431705	0.0170606	0.0205749	0.000840837	0.021129	0.0285706	0.00259696			0.0114115	0.0123894	0.183832	0.0134081	0.0166446	0.041704	0.0107471		0.015121	0.0105847	0.0107077		0.015083	0.0093142	0.00947597
OR82	average	USGS	50.921	0.4545	4.06	0.147	5.3605	0.103	15.8805	23.397	0.203	nd	100.526	2	1.85382	0.012442	0.174268	0.00423401	0.103304	0.059933	0.00317574	0.861831	0.912661	0.0143306	nd	4	0.14618	0.0280884	1.73568	0.840722	0.934943	0.921764	0.135626		0.497524	0.469795	0.0326813		0.470999	0.44475	0.0842509
OR83A	average	USGS	50.831	0.451444	3.931	0.123778	9.07722	0.193444	15.2528	19.0284	0.334111	nd	99.2232	9	1.89327	0.0125503	0.173023	0.00362409	0.0686208	0.215808	0.00609971	0.846011	0.756932	0.0240661	nd	4	0.106735	0.0662878	0.565837	0.753868	0.807888	1.06182	0.138533		0.415382	0.464997	0.119621		0.399293	0.448129	0.152577
	1 sigma		0.374692	0.2148	0.839457	0.103777	3.47997	0.0757189	0.939417	3.54762	0.0688145				0.0404138	0.00594828	0.0396238	0.00302011	0.0398149	0.147531	0.00235886	0.0392413	0.131493	0.00475377			0.0404138	0.071029	0.446516	0.0807705	0.108126	0.186772	0.0334674		0.0684313	0.0168913	0.0837299		0.0600751	0.0112633	0.0672639
92OMB148	average	U. Okla.	51.956	0.390909	3.00405	0.218227	5.96241	0.171136	16.0766	21.8257	0.297955	0.0203182	99.9234	21	1.90565	0.0108017	0.130004	0.00630577	0.0529431	0.130215	0.00532918	0.878838	0.857746	0.0212121	0.000951675	4	0.0943462	0.0356577	0.422758	0.827796	0.871171	1.00905	0.0949066		0.459613	0.470509	0.0698773		0.446825	0.457668	0.0955071
	1 sigma		1.08132	0.148633	0.938565	0.161783	1.49944	0.0892791	0.992474	0.881327	0.0591496	0.00600293			0.031331	0.00412975	0.0409178	0.00465682	0.0232362	0.0355914	0.00281283	0.0493643	0.0332471	0.00431741	0.000283315		0.031331	0.0129636	0.22001	0.0421669	0.0331693	0.0849556	0.0264834		0.0195124	0.0192588	0.0194349		0.0176058	0.0230411	0.0247321
92OMB150B	average	U. Okla.	52.6274	0.332769	2.25992	0.228	5.48185	0.154538	16.5577	21.9145	0.301769	0.0210769	99.8795	12	1.92734	0.00920815	0.0977487	0.00657825	0.0450267	0.123326	0.00480528	0.903676	0.85984	0.0214664	0.000984802	4	0.0726594	0.0250894	0.364543	0.843361	0.879631	1.027	0.0766943		0.455696	0.478585	0.0657195		0.445039	0.467591	0.0873701
	1 sigma		1.19693	0.206257	0.8947	0.153224	1.96978	0.0547071	1.13051	0.752111	0.0803063	0.00972278			0.0322332	0.00575789	0.0390152	0.00440818	0.0231191	0.0441983	0.00173278	0.0554222	0.0241018	0.00585267	0.000455344		0.0322332	0.00905394	0.160813	0.0558197	0.0432317	0.0996204	0.0260609		0.00888958	0.02081	0.0244005		0.0102688	0.0252055	0.0325347
92OMB151A	average	U. Okla.	51.7248	0.393364	3.20509	0.337273	5.33145	0.135364	16.0183	22.2581	0.277455	0.0178182	99.699	11	1.89935	0.0108814	0.138799	0.00975922	0.051576	0.112375	0.00421631	0.876723	0.87571	0.0197714	0.000834315	4	0.100646	0.0381535	0.473423	0.842951	0.886446	0.989097	0.0994887		0.469607	0.469966	0.0604266		0.456952	0.457438	0.0856095
	1 sigma		0.792385	0.12918	0.641768	0.301014	1.51953	0.0760398	0.778511	0.649968	0.0625262	0.00856863			0.021045	0.0036211	0.0282343	0.008696	0.0175964	0.0340202	0.00238434	0.0385473	0.0231872	0.00452911	0.000399129		0.021045	0.00956367	0.126493	0.0433557	0.033699	0.0725676	0.0171939		0.0112408	0.0151573	0.0187348		0.0113764	0.0186924	0.024907
93OMB260	average	USGS	52.0037	0.34675	3.4825	0.14125	5.5845	0.1445	15.9245	22.2345	0.29125	0.01725	100.171	4	1.90103	0.00953012	0.150025	0.00406723	0.0462357	0.124529	0.00447593	0.867755	0.870894	0.0206489	0.000805098	4	0.0989672	0.051058	0.376634	0.835552	0.87442	0.992284	0.101361		0.467413	0.46571	0.0668777		0.456102	0.454439	0.089459
	1 sigma		0.495383	0.0968462	0.726671	0.139638	0.490692	0.0130096	0.40293	0.260141	0.0212647	0.00286138			0.0176801	0.00264935	0.0311711	0.00401302	0.0123856	0.0118554	0.000422955	0.0189316	0.011529	0.00159069	0.000137802		0.0176801	0.0161753	0.107501	0.0147297	0.0126372	0.030787	0.0129033		0.00353122	0.00770133	0.00671498		0.00428403	0.00792382	0.00826312
MMB903C	average	USGS	51.6383	0.497455	3.26227	0.111818	6.03318	0.161273	15.7263	21.9561	0.319909	0.0205455	99.7271	11	1.89932	0.0138041	0.141588	0.00323893	0.0527472	0.133187	0.00503663	0.862114	0.865149	0.0228545	0.000963073	4	0.100683	0.0409058	0.435923	0.824045	0.867119	0.995301	0.0968919		0.464934	0.46312	0.0719455		0.452134	0.450432	0.0974347
	1 sigma		1.05571	0.231007	0.91092	0.100416	2.10752	0.0855805	0.898305	1.17608	0.1081	0.00538286			0.029273	0.00650287	0.0401799	0.00290736	0.0173732	0.0539697	0.00269196	0.0443585	0.0423477	0.00783707	0.000247864		0.029273	0.0125734	0.179735	0.0581104	0.0514938	0.0983282	0.0244219		0.0188533	0.0155691	0.0298903		0.0201144	0.0187907	0.0351153
92OMB172A	average	USGS	51.2219	0.623667	3.15508	0.108833	7.72325	0.241	15.1047	21.2449	0.389583	0.0219167	99.8348	12	1.89319	0.0173517	0.137433	0.00317513	0.0672541	0.171514	0.00754489	0.832243	0.841334	0.0279217	0.00103332	4	0.106805	0.0306277	0.431748	0.777628	0.83036	1.00376	0.101057		0.456223	0.451016	0.0927613		0.440049	0.435171	0.124781
	1 sigma		0.860379	0.154731	0.86509	0.235257	0.910067	0.0716903	0.368821	0.648129	0.0444643	0.00588017			0.0302814	0.00433944	0.0375984	0.0068495	0.0171285	0.0346731	0.00223851	0.0190104	0.0252159	0.00320255	0.000276877		0.0302814	0.011086	0.208918	0.0216422	0.0287565	0.0536835	0.0254239		0.0192373	0.00555716	0.017961		0.0159635	0.00824592	0.0142903
Rattlesnake Creek terrane
KM85B	average	U. Wyo.	51.0011	0.45925	3.39488	0.04525	7.8705	0.234625	15.291	21.0019	0.4095	0.0215	99.7295	8	1.88395	0.0127814	0.147849	0.00131043	0.0877691	0.155636	0.007352	0.841911	0.831059	0.0293722	0.00101309	4	0.116053	0.0317959	0.607954	0.776293	0.844793	0.997547	0.120875		0.454523	0.460256	0.0852208		0.433591	0.439242	0.127167
	1 sigma		0.978497	0.124207	0.870323	0.077974	1.42067	0.0677863	0.674156	0.986895	0.111096	0.0052915			0.0320015	0.00349205	0.0379941	0.00224812	0.0249533	0.039575	0.00215234	0.032886	0.0343273	0.00807973	0.000249001		0.0320015	0.0077716	0.272939	0.0386293	0.0359636	0.072461	0.0287543		0.0180548	0.010155	0.021875		0.0157667	0.0144383	0.0241087
92KM6	average	U. Wyo.	51.9301	0.519923	4.51538	0.107615	8.05946	0.202462	14.5876	18.9646	0.681846	0.253538	99.8225	12	1.91742	0.0144179	0.197496	0.00313496	0.0491223	0.199641	0.00632589	0.80206	0.749019	0.0492265	0.0121382	4	0.0923147	0.105181	0.249095	0.756804	0.792997	1.0017	0.157439		0.404937	0.465901	0.129162		0.393687	0.45419	0.152123
	1 sigma		1.36568	0.168325	4.57789	0.104243	0.908145	0.048652	2.71058	5.4141	1.1204	0.800653			0.0612516	0.00466552	0.203492	0.00304472	0.0175299	0.021926	0.001515	0.147386	0.213652	0.081778	0.0383952		0.028599	0.229841	0.0967597	0.0457172	0.0559339	0.169312	0.214924		0.110733	0.0378984	0.0738357		0.107456	0.0412659	0.0672349
BL136	average	U. Wyo.	51.5528	0.325167	1.61517	0.0293333	9.31067	0.304	14.6663	20.745	0.2995	nd	98.848	6	1.93735	0.009193	0.0715364	0.000871702	0.0563306	0.236281	0.00967704	0.821645	0.835296	0.0218211	nd	4	0.0626518	0.00888461	0.240997	0.737417	0.776745	1.05793	0.0660869		0.441211	0.434012	0.124777		0.428456	0.421459	0.150085
	1 sigma		0.211359	0.0360343	0.207304	0.0529832	0.303075	0.0282548	0.186844	0.306701	0.0225148				0.00893209	0.00101797	0.00917459	0.00157484	0.0103556	0.0136604	0.00090693	0.0101333	0.0122295	0.00162791			0.00893209	0.00537458	0.0540197	0.00689288	0.0107171	0.0237937	0.00878158		0.00657126	0.00636395	0.00671143		0.00614934	0.00552089	0.00451628
Forks of Salmon pluton
KM45	average	U. Wyo.	52.8233	0.228333	1.615	nd	7.465	0.396667	14.915	21.6683	0.321667	nd	99.4333	6	1.96456	0.0063897	0.0708036	0	0.0156341	0.216544	0.0124961	0.826926	0.863455	0.0231951	nd	4	0.0354433	0.0353602	0.0740685	0.781026	0.792656	1.04347	0.0509943		0.45271	0.433696	0.113594	#DIV/0!	0.449056	0.430146	0.120798
	1 sigma		0.639552	0.133778	0.602652		0.587971	0.0314113	0.202756	0.89065	0.0194079				0.0230643	0.00375422	0.0265123	0	0.0147597	0.0163095	0.000999224	0.00991392	0.0355556	0.00140583			0.0230643	0.0118637	0.074917	0.0119131	0.0117717	0.0224204	0.0115604		0.015344	0.00828182	0.00908599	#DIV/0!	0.0162698	0.00677407	0.00991733
KM46	average	U. Wyo.	52.555	0.2575	1.7375	nd	8.8175	0.515	13.6125	21.065	0.3525	nd	98.9125	5	1.98033	0.007296	0.0771426	0	0	0.277888	0.0164392	0.764719	0.850438	0.0257468	nd	4	0.0196687	0.0574738	0	0.733367	0.733367	1.04261	0.0574738		0.449302	0.40389	0.146808	#DIV/0!	0.449302	0.40389	0.146808
	1 sigma		0.28243	0.0741058	0.328062		0.544755	0.0465475	0.526015	0.403526	0.0512348				0.0054759	0.00208173	0.0144316	0	0	0.0175229	0.00151816	0.0311046	0.0132014	0.00368622			0.0054759	0.0120981	0	0.0176187	0.0176187	0.0276335	0.0120981		0.0102712	0.0134116	0.0095007	#DIV/0!	0.0102712	0.0134116	0.0095007
KM49A	average	U. Wyo.	52.034	0.34	2.092	nd	8.784	0.472	13.476	21.682	0.344	nd	99.224	5	1.95462	0.00958953	0.0924778	0	0.0071956	0.268797	0.0150243	0.754584	0.872661	0.0250455	nd	4	0.0455699	0.0469079	0.0301935	0.732402	0.737764	1.02338	0.0541036		0.46016	0.398326	0.141515	#DIV/0!	0.458403	0.39673	0.144867
	1 sigma		1.25606	0.350286	1.74853		0.859901	0.136272	0.439466	0.98266	0.0844393				0.0514064	0.00986984	0.0771485	0	0.0084752	0.0347278	0.00436214	0.0231447	0.0403832	0.0061099			0.0511889	0.0262089	0.0375446	0.0228259	0.0285062	0.0306145	0.0344194		0.0147179	0.02008	0.0154654	#DIV/0!	0.0154064	0.0184967	0.0123312
KM49C	average	U. Wyo.	53.96	0.115	0.41	nd	7.23	0.92	13.715	23.065	0.35	nd	99.765	2	2.01356	0.00322908	0.0180321	0	0	0.225623	0.029076	0.762959	0.922197	0.0253185	nd	4	0	0.0180321	0	0.771843	0.771843	0.988583	0.0180321		0.482621	0.399289	0.118091	#DIV/0!	0.482621	0.399289	0.118091
	1 sigma
KM45 opx	average	U. Wyo.	53.332	0.168	1.67	nd	16.724	0.76	25.33	1.124	0.024	nd	99.132	5	1.95599	0.00462998	0.0721596	0	0.0176988	0.495261	0.0236095	1.38479	0.0441575	0.0017036	nd	4	0.0440064	0.0281531	0.0372649	0.729692	0.736614	1.88005	0.0458519		0.0229539	0.719692	0.257354	#DIV/0!	0.0227312	0.713103	0.264166
	1 sigma		0.478299	0.0496991	0.135093		0.141704	0.043589	0.431567	0.0958123	0.0114018				0.0202034	0.00134262	0.00548019	0	0.0215092	0.021068	0.00136796	0.0118972	0.00361663	0.000806301			0.0202034	0.0154523	0.0459397	0.00289521	0.00967486	0.0135764	0.010072		0.00196155	0.0081274	0.00993184	#DIV/0!	0.00172843	0.00224078	0.00315354
*apfu = atoms per formula unit based on 6 oxygens
Fe3+ calculated according to Droop (1987)
Droop, G.T.R. (1987) Mineralogical Magazine, 51, 431–435.

## Sheet: complete analyses
sample		SiO2	TiO2	Al2O3	Cr2O3	FeO	MnO	MgO	CaO	Na2O	K2O	Total		Si	Ti	Al	Cr	Fe3+**	Fe2+	Mn	Mg	Ca	Na	K	Total	Aliv	Alvi	Fe3+/Fe2+	Mg/(Mg+Fet)	Mg/Mg+Fe2)	Mg+Fe2	R3+ (M1)		Wo	En	Fs (uses Fe2+)		Wo	En	Fs (uses Fet)
		oxide wt%	oxide wt%	oxide wt%	oxide wt%	oxide wt%	oxide wt%	oxide wt%	oxide wt%	oxide wt%	oxide wt%			apfu*	apfu	apfu	apfu	apfu	apfu	apfu	apfu	apfu	apfu	apfu		apfu	apfu
western Hayfork terrane
KM7D	cpx1a	51.18	0.48	4.02	nd	4.77	0.14	14.9	22.68	0.22	nd	98.39		1.90745	0.0134583	0.176577	nd	0	0.148676	0.00441944	0.827848	0.905671	0.0158972	nd	4	0.0925471	0.08403	0	0.84775	0.84775	0.976524	0.08403		0.481178	0.439831	0.0789906		0.481178	0.439831	0.0789906
KM7D	cpx1b	51.67	0.34	3.35	nd	4.81	0.13	15.08	22.64	0.23	nd	98.25		1.92814	0.00954501	0.147333	nd	0	0.150112	0.00410894	0.838905	0.905214	0.0166407	nd	4	0.0718577	0.0754754	0	0.848221	0.848221	0.989016	0.0754754		0.47788	0.442874	0.0792467		0.47788	0.442874	0.0792467
KM7D	cpx2nc	51.26	0.72	3.14	nd	8.25	0.25	14.48	20.86	0.42	nd	99.38		1.90975	0.0201803	0.137874	nd	0.0326068	0.224445	0.00788903	0.804224	0.832695	0.0303383	nd	4	0.0902514	0.0476224	0.145278	0.75779	0.781811	1.02867	0.0802292		0.447358	0.432062	0.120581		0.439656	0.424623	0.135721
KM7D	cpx2nr	52.1	0.6	2.61	nd	7.72	0.27	14.5	20.92	0.4	nd	99.12		1.9455	0.0168555	0.114865	nd	0	0.24109	0.00853971	0.807183	0.837007	0.0289599	nd	4	0.0545005	0.0603647	0	0.770012	0.770012	1.04827	0.0603647		0.44397	0.42815	0.12788		0.44397	0.42815	0.12788
KM7D	cpx3a	50.85	0.67	3.04	nd	8.48	0.35	13.86	20.86	0.45	nd	98.56		1.91507	0.018983	0.134934	nd	0.0298249	0.237265	0.0111647	0.778156	0.841747	0.0328587	nd	4	0.0849331	0.0500009	0.125703	0.744472	0.766338	1.01542	0.0798257		0.453242	0.419002	0.127756		0.446078	0.412379	0.141543
KM7D	cpx3b	50.79	0.65	2.73	nd	8	0.27	14.02	21.05	0.38	nd	97.89		1.92373	0.0185215	0.121866	nd	0.0215305	0.23188	0.00866196	0.791636	0.854265	0.0279058	nd	4	0.0762671	0.0455993	0.0928519	0.757512	0.773447	1.02352	0.0671298		0.454933	0.42158	0.123486		0.449776	0.416801	0.133422
MMB672D	cpx1nc	53.2	0.39	1.75	nd	3.9	0.12	16.4	22.77	0.19	nd	98.72		1.96794	0.0108533	0.0762946	nd	0	0.120652	0.00375983	0.904389	0.902481	0.013627	nd	4	0.0320568	0.0442378	0	0.882296	0.882296	1.02504	0.0442378		0.468208	0.469198	0.0625943		0.468208	0.469198	0.0625943
MMB672D	cpx1nr	52.38	0.31	2.14	nd	4.24	0.13	16.41	22.55	0.2	nd	98.36		1.94353	0.00865333	0.0935822	nd	0.0164466	0.115124	0.00408559	0.907704	0.89649	0.014388	nd	4	0.0564738	0.0371085	0.14286	0.873401	0.887445	1.02283	0.0535551		0.467088	0.47293	0.0599817		0.463119	0.468912	0.0679683
MMB672D	cpx2ir	49.95	0.85	3.95	nd	8.69	0.23	13.38	20.78	0.41	nd	98.24		1.89002	0.0241961	0.17615	nd	0.0255068	0.249484	0.00737129	0.754739	0.84246	0.0300786	nd	4	0.109985	0.0661646	0.102238	0.732949	0.751565	1.00422	0.0916714		0.456202	0.4087	0.135098		0.449987	0.403132	0.146882
MMB672D	cpx2nc	52.7	0.32	2.04	nd	4.03	0.13	16.41	22.79	0.58	nd	99		1.93693	0.0088481	0.0883666	nd	0.0614077	0.0624654	0.004047	0.89913	0.897474	0.041331	nd	4	0.0630698	0.0252969	0.983068	0.878912	0.93504	0.961596	0.0867045		0.482754	0.483645	0.0336003		0.467318	0.468181	0.0645012
MMB672D	cpx3nc	50.86	0.85	3.1	nd	8.91	0.3	13.95	20.72	0.46	nd	99.15		1.90581	0.0239618	0.136905	nd	0.036974	0.242248	0.00952161	0.77927	0.831892	0.0334199	nd	4	0.0941913	0.0427137	0.152629	0.736208	0.762855	1.02152	0.0796877		0.448844	0.420452	0.130704		0.440065	0.412229	0.147706
MMB672D	cpx3nr	49.64	0.85	4	nd	8.37	0.26	14.23	21.37	0.44	nd	99.16		1.85263	0.0238656	0.175942	nd	0.102915	0.158331	0.00821893	0.79172	0.854544	0.0318385	nd	4	0.147375	0.0285676	0.649995	0.751895	0.833344	0.950051	0.131482		0.473538	0.438724	0.0877379		0.447989	0.415054	0.136957
BL116B	cpx1oc	53.07	0.18	1.98	nd	2.96	0.08	16.32	23.32	0.22	nd	98.13		1.96876	0.00502357	0.086569	nd	0	0.0918338	0.00251373	0.902555	0.926926	0.0158238	nd	4	0.0312448	0.0553242	0	0.907648	0.907648	0.994388	0.0553242		0.482444	0.469759	0.0477974		0.482444	0.469759	0.0477974
BL116B	cpx1nr	52.97	0.25	1.52	nd	3.08	0.14	16.91	23.48	0.25	nd	98.6		1.9529	0.00693403	0.0660461	nd	0.0321659	0.0628	0.00437183	0.929401	0.927515	0.0178704	nd	4	0.0471049	0.0189412	0.512196	0.907293	0.936706	0.992201	0.0511072		0.483152	0.484135	0.0327132		0.47519	0.476156	0.0486535
BL116B	cpx2oc	52.92	0.28	1.85	nd	4	0.08	16.8	22.55	0.25	nd	98.73		1.9525	0.00777187	0.0804447	nd	0.0168996	0.106524	0.00250004	0.92404	0.891438	0.0178836	nd	4	0.0475022	0.0329425	0.158646	0.882169	0.896635	1.03056	0.0498421		0.463807	0.480769	0.0554236		0.459765	0.476579	0.0636566
BL116B	cpx2nr	53.54	0.18	1.44	nd	3.79	0.13	17.23	22.75	0.22	nd	99.28		1.96224	0.00496299	0.0622002	nd	0.019021	0.0971458	0.00403556	0.941392	0.893367	0.015633	nd	4	0.0377571	0.0244431	0.195798	0.890156	0.906459	1.03854	0.0434641		0.462428	0.487287	0.050285		0.45792	0.482536	0.0595444
BL116B	cpx3nc	51.31	0.38	2.62	nd	7.81	0.35	13.88	22.15	0.69	nd	99.19		1.91323	0.0106597	0.115139	nd	0.08697	0.156578	0.011054	0.771551	0.884937	0.0498836	nd	4	0.0867722	0.0283664	0.555443	0.760075	0.831297	0.928129	0.115336		0.488089	0.425551	0.0863607		0.465748	0.406072	0.128181
BL116B	cpx3nr	51.65	0.29	2.68	nd	4.75	0.13	16.12	22.86	0.45	nd	98.93		1.90403	0.00804265	0.116438	nd	0.0915732	0.054869	0.00405914	0.88589	0.902931	0.0321633	nd	4	0.0959665	0.0204713	1.66894	0.858144	0.941676	0.940759	0.112044		0.489741	0.480498	0.0297604		0.466567	0.457762	0.0756704
KM37C	cpx1a	50.69	0.55	4.15	nd	6.07	0.16	15.19	21.76	0.34	nd	98.91		1.88044	0.0153496	0.181443	nd	0.0514256	0.136894	0.00502741	0.840052	0.86491	0.0244546	nd	4	0.119557	0.0618865	0.37566	0.816876	0.859876	0.976946	0.113312		0.469586	0.45609	0.0743238		0.456831	0.443702	0.0994672
KM37C	cpx1b	53.09	0.14	1.73	nd	4.14	0.09	17.04	22.07	0.25	nd	98.55		1.96072	0.0038898	0.0753014	nd	0.0133844	0.114486	0.00281534	0.938172	0.873331	0.0179014	nd	4	0.039282	0.0360194	0.116908	0.880051	0.891241	1.05266	0.0494038		0.453445	0.487112	0.0594429		0.450316	0.48375	0.065934
KM37C	cpx1c	51.9	0.52	2.11	nd	7.65	0.29	15.61	20.65	0.4	nd	99.13		1.92949	0.0145437	0.092451	nd	0.0483216	0.189529	0.00913184	0.865143	0.822562	0.0288323	nd	4	0.0705139	0.0219371	0.254956	0.784359	0.820296	1.05467	0.0702587		0.438178	0.460861	0.100962		0.427182	0.449295	0.123523
											nd
RU 175-1		48.968	0.532	3.625	0.003	7.638	0.454	12.973	22.565	0.598	nd	97.356		1.86382	0.0152335	0.162613	0	0.123324	0.119807	0.0146364	0.736109	0.920239	0.0441303	nd	4	0.136182	0.0264309	1.02936	0.751715	0.860025	0.855916	0.149845		0.518107	0.41444	0.0674528		0.484469	0.387532	0.127998
RU 175-2 same grain		49.981	0.41	3.224	0	7.976	0.457	13.381	22.53	0.669	nd	98.628		1.87666	0.0115814	0.14267	0	0.129544	0.120914	0.0145339	0.748998	0.906393	0.0487026	nd	4	0.123337	0.0193328	1.07137	0.749406	0.861004	0.869912	0.148876		0.510269	0.421661	0.0680707		0.475585	0.393	0.131415
RU 175-4 small, interiorw/rim ??		49.47	0.734	4.135	0.025	9.233	0.287	14.243	19.587	0.594	nd	98.308		1.86238	0.0207883	0.183466	0.000744113	0.0928196	0.197875	0.00915152	0.799351	0.790073	0.0433567	nd	4	0.137625	0.0458412	0.469083	0.733319	0.801575	0.997226	0.139405		0.442049	0.44724	0.110712		0.420225	0.42516	0.154615
RU 175-6small--replaced?		50.007	0.54	3.033	0	7.673	0.499	13.646	22.539	0.659	nd	98.596		1.87647	0.0152441	0.134134	0	0.130375	0.110419	0.0158598	0.763357	0.906192	0.0479448	nd	4	0.123526	0.0106079	1.18073	0.760202	0.87363	0.873776	0.140983		0.509106	0.42886	0.0620343		0.474361	0.399592	0.126047
RU 175-7small--replaced? another grain		50.687	0.475	2.814	0.01	7.24	0.454	14.044	22.465	0.523	nd	98.712		1.89788	0.0133802	0.12418	0.000296037	0.0909773	0.135737	0.0143984	0.783922	0.901264	0.037968	nd	4	0.102123	0.022057	0.670248	0.775672	0.852405	0.919659	0.11333		0.494949	0.430508	0.0745428		0.471397	0.410023	0.11858
RU 175-8small 2 sides w/feldspar		50.514	0.578	3.2	0.009	7.175	0.199	15.24	21.366	0.376	nd	98.657		1.88419	0.0162195	0.140675	0.000265417	0.08543	0.138392	0.00628713	0.84744	0.853907	0.0271923	nd	4	0.115809	0.0248666	0.617302	0.791067	0.859619	0.985832	0.110562		0.464146	0.46063	0.0752239		0.443549	0.44019	0.116261
RU177-2.1 core		52.309	0.497	3.164	0	7.007	0.313	14.282	22.046	0.395	nd	100.013		1.93351	0.0138205	0.137836	0	0	0.216607	0.00979944	0.786993	0.873122	0.0283082	nd	4	0.0664853	0.0713505	0	0.78417	0.78417	1.0036	0.0713505		0.465238	0.419345	0.115418		0.465238	0.419345	0.115418
RU177-3.1 core		52.583	0.621	2.391	0.047	7.291	0.234	15.584	20.907	0.296	nd	99.974		1.94019	0.017238	0.103976	0.0013711	0.00097569	0.22401	0.00731308	0.857212	0.826541	0.0211755	nd	4	0.0598116	0.0441643	0.00435558	0.792103	0.792818	1.08122	0.0465111		0.433252	0.449328	0.11742		0.43303	0.449099	0.117871
RU177-4.1 core		52.436	0.404	2.772	0.067	9.819	0.46	14.379	20.255	0.337	nd	100.869		1.93397	0.0112098	0.120495	0.00195375	0.0112983	0.291571	0.0143702	0.790603	0.800434	0.0240987	nd	4	0.0660337	0.0544608	0.0387498	0.723021	0.730569	1.08217	0.0677128		0.425173	0.419951	0.154876		0.422637	0.417446	0.159918
RU177-5.1 core		52.719	0.281	2.358	0.01	8.429	0.416	14.894	19.773	0.262	nd	99.139		1.9705	0.00790156	0.103874	0.000295518	0	0.263484	0.0131701	0.829911	0.791874	0.018987	nd	4	0.0294982	0.0743762	0	0.759022	0.759022	1.0934	0.0746717		0.420032	0.440208	0.139759		0.420032	0.440208	0.139759
RU177-2.2 rim		49.743	0.551	6.298	0.007	7.373	0.173	13.651	22.669	0.321	nd	100.826		1.82275	0.0151895	0.27199	0.0002028	0.0747234	0.151225	0.00536943	0.745713	0.890026	0.0228058	nd	4	0.177245	0.0947455	0.494122	0.767462	0.831399	0.896937	0.169672		0.498066	0.417307	0.0846267		0.478075	0.400557	0.121367
RU177-3.2 rim		51.871	0.8	2.92	0	8.874	0.238	14.637	20.615	0.34	nd	100.305		1.91928	0.022269	0.127336	0	0.013951	0.26065	0.00745894	0.807378	0.817282	0.0243914	nd	4	0.0807169	0.0466193	0.053524	0.746205	0.755952	1.06803	0.0605703		0.4335	0.428247	0.138253		0.430316	0.425101	0.144583
RU177-5.1 rim		52.569	0.343	2.326	0.007	9.762	0.438	14.907	19.504	0.338	nd	100.187		1.94908	0.00956732	0.10164	0.000205197	0.00516334	0.297533	0.013755	0.823949	0.774813	0.0242974	nd	4	0.0509228	0.050717	0.0173539	0.73133	0.734697	1.12148	0.0560856		0.408593	0.434505	0.156902		0.407484	0.433325	0.159191
RU177-4.2 rim		52.097	0.453	2.853	0	9.35	0.447	14.339	20.465	0.3	nd	100.304		1.9316	0.0126357	0.12467	0	0.00842125	0.281503	0.0140378	0.792564	0.813	0.021566	nd	4	0.0683982	0.0562716	0.0299153	0.732169	0.737909	1.07407	0.0646928		0.430827	0.419998	0.149175		0.428913	0.418132	0.152955
RU-89B-1.1		52.515	0.474	2.471	0.034	10.609	0.301	15.673	18.479	0.245	nd	100.801		1.93466	0.013137	0.107287	0.000990315	0.0136341	0.313227	0.00939233	0.860763	0.729412	0.0174997	nd	4	0.0653429	0.0419443	0.0435277	0.724777	0.733194	1.17399	0.0565687		0.383215	0.452223	0.164562		0.38049	0.449007	0.170503
RU-89B-1.2 rim		51.731	0.494	3.085	0.018	10.256	0.303	15.482	18.327	0.26	nd	99.956		1.91939	0.0137891	0.134903	0.000528029	0.0169222	0.30132	0.00952226	0.856346	0.728579	0.0187038	nd	4	0.0806138	0.0542892	0.0561602	0.729061	0.739718	1.15767	0.0717394		0.386259	0.453995	0.159746		0.382825	0.449958	0.167217
RU-89B-2.2 rim		52.737	0.302	3.48	0.118	5.773	0.149	15.904	22.11	0.235	nd	100.787		1.91827	0.00826415	0.149186	0.00339352	0.0109261	0.16469	0.00459057	0.862405	0.861702	0.0165732	nd	4	0.0817304	0.0674557	0.0663436	0.830817	0.839655	1.02709	0.0817753		0.456217	0.45659	0.087193		0.453593	0.453964	0.092443
RU-89B-2.1 core		52.12	0.404	3.866	0.097	6.017	0.181	15.558	22.376	0.21	nd	100.85		1.89842	0.0110705	0.16596	0.0027934	0.0271019	0.156187	0.00558408	0.844796	0.87326	0.0148303	nd	4	0.101583	0.0643771	0.173522	0.821718	0.843967	1.00098	0.0942724		0.465927	0.45074	0.0833333		0.459286	0.444315	0.0963995
RU-89B-3.1 core		54.238	0.224	1.46	0.186	5.142	0.161	17.108	21.794	0.171	nd	100.484		1.97412	0.0061336	0.0626294	0.00535251	0	0.15652	0.00496344	0.928283	0.849927	0.0120673	nd	4	0.0258768	0.0367526	0	0.855715	0.855715	1.0848	0.0421051		0.4393	0.4798	0.0809004		0.4393	0.4798	0.0809004
RU-89B-3.2 core		53.935	0.163	2.346	0.163	5.1	0.168	16.961	21.812	0.194	nd	100.842		1.95433	0.00444337	0.100187	0.0046697	0	0.154549	0.00515612	0.9162	0.846833	0.0136293	nd	4	0.0456666	0.0545202	0	0.855663	0.855663	1.07075	0.05919		0.441615	0.477789	0.0805959		0.441615	0.477789	0.0805959
RU-89B-4.1 core		51.649	0.305	3.668	0.084	6.571	0.174	15.377	22.059	0.206	nd	100.093		1.89766	0.0084305	0.158833	0.00244011	0.0412218	0.160687	0.00541491	0.842245	0.868393	0.0146747	nd	4	0.102341	0.0564923	0.256534	0.806629	0.839782	1.00293	0.100154		0.464052	0.45008	0.0858682		0.45405	0.440379	0.105571
RU-89B-4.2 core		52.574	0.313	3.753	0.106	6.398	0.165	15.673	22.252	0.2	nd	101.434		1.90483	0.00853151	0.160257	0.00303644	0.0240363	0.169828	0.00506355	0.84654	0.863829	0.0140494	nd	4	0.0951719	0.0650855	0.141533	0.813665	0.832907	1.01637	0.0921583		0.459435	0.45024	0.0903244		0.453636	0.444557	0.101807
RU-89B-5.1 core		52.516	0.482	2.054	0.011	9.992	0.34	15.399	19.07	0.287	nd	100.151		1.94688	0.0134428	0.0897433	0.000322413	0.00992494	0.299865	0.0106761	0.85104	0.757481	0.0206287	nd	4	0.0531238	0.0366195	0.033098	0.733131	0.739453	1.1509	0.0468669		0.396922	0.445948	0.15713		0.394869	0.44364	0.161491
RU-89B-5.2 core		53.001	0.399	2.069	0.004	10.711	0.391	15.512	18.12	0.296	nd	100.503		1.96036	0.0111025	0.090192	0.000116973	0	0.331323	0.0122494	0.855325	0.7181	0.021227	nd	4	0.0396357	0.0505563	0	0.720791	0.720791	1.18665	0.0506733		0.377005	0.449049	0.173946		0.377005	0.449049	0.173946
RU-182 1.1		51.789	0.551	3.177	0.011	7.998	0.309	15.211	20.489	0.305	nd	99.84		1.91585	0.0153346	0.138515	0.000321729	0.0206747	0.226767	0.00968207	0.838865	0.812116	0.021876	nd	4	0.0841521	0.0543625	0.0911715	0.772217	0.787199	1.06563	0.0753589		0.432495	0.44674	0.120765		0.427785	0.441874	0.130341
RU-182 1.2		50.869	0.658	3.799	0	7.566	0.259	14.632	21.315	0.397	nd	99.495		1.88737	0.0183665	0.166123	0	0.0509552	0.183813	0.00813937	0.809318	0.847353	0.0285588	nd	4	0.112626	0.0534966	0.277212	0.775145	0.814916	0.993131	0.104452		0.460397	0.439731	0.0998722		0.447994	0.427885	0.124122
RU-182 2.1		50.66	0.703	4.365	0.005	8.055	0.216	13.688	22.042	0.407	nd	100.141		1.87511	0.0195755	0.190414	0.00014632	0.0492827	0.200059	0.00677174	0.755286	0.87415	0.0292078	nd	4	0.124893	0.0655211	0.246341	0.751807	0.79059	0.955345	0.11495		0.477809	0.412839	0.109352		0.465276	0.402009	0.132715
RU-182 2.2		50.605	0.84	4.731	0.002	8.017	0.205	14.087	21.585	0.409	nd	100.481		1.86367	0.023273	0.205345	0	0.0499102	0.19701	0.00639464	0.773402	0.851731	0.0292041	nd	4	0.136328	0.0690173	0.253339	0.757998	0.796983	0.970412	0.118986		0.467434	0.424447	0.10812		0.454971	0.41313	0.131898
RU-182 3.1		50.422	0.812	4.631	0	8.633	0.24	13.663	21.167	0.365	nd	99.933		1.87321	0.0226945	0.202767	0	0.0317094	0.236514	0.00755204	0.7567	0.842559	0.0262908	nd	4	0.126787	0.0759796	0.13407	0.738299	0.76187	0.993214	0.107689		0.458967	0.412197	0.128836		0.451174	0.405198	0.143628
RU-182 3.2		50.815	0.856	3.772	0.003	9.477	0.301	13.999	20.736	0.384	nd	100.343		1.88345	0.0238689	0.164774	0	0.0481	0.245666	0.00944962	0.773516	0.823495	0.0275954	nd	4	0.116552	0.0482218	0.195794	0.724753	0.758958	1.01918	0.0964096		0.446901	0.419779	0.13332		0.435533	0.4091	0.155368
RU-182 4.2		52.546	0.455	2.485	0	8.042	0.335	15.422	20.656	0.298	nd	100.239		1.9367	0.0126163	0.107945	0	0.0147156	0.233172	0.0104581	0.847372	0.815724	0.0212953	nd	4	0.0632991	0.0446462	0.0631105	0.773672	0.784209	1.08054	0.0593619		0.430173	0.446863	0.122964		0.426861	0.443422	0.129717
RU-182 4.1		51.046	0.716	3.817	0.007	8.669	0.321	14.631	20.837	0.36	nd	100.404		1.88282	0.0198681	0.165929	0.000204135	0.0542415	0.213172	0.0100285	0.804509	0.823485	0.025745	nd	4	0.117183	0.0487463	0.254449	0.750529	0.790531	1.01768	0.103192		0.447263	0.436956	0.115781		0.434463	0.424452	0.141085
RU88-1		50.472	0.555	3.158	0.003	10.169	0.299	15.166	18.334	0.302	nd	98.458		1.90084	0.0157248	0.140172	8.93283e-05	0.0486706	0.271617	0.00953787	0.851482	0.739819	0.0220519	nd	4	0.0991647	0.0410072	0.179188	0.726663	0.758154	1.1231	0.089767		0.397129	0.457069	0.145802		0.387018	0.445432	0.167551
RU88-2		50.488	0.526	3.202	0.072	8.811	0.24	15.222	19.937	0.271	nd	98.769		1.88977	0.0148116	0.141253	0.00213072	0.0671224	0.20869	0.00760883	0.849382	0.799566	0.0196668	nd	4	0.110231	0.0310215	0.321637	0.754876	0.802764	1.05807	0.100275		0.430421	0.457237	0.112342		0.415411	0.441292	0.143297
RU88-3		50.825	0.441	2.495	0.049	8.766	0.288	15.511	20.008	0.253	nd	98.636		1.90422	0.0124301	0.110171	0.00145148	0.0734471	0.201222	0.00913943	0.866346	0.80319	0.0183783	nd	4	0.0957756	0.0143951	0.365005	0.759276	0.811513	1.06757	0.0892936		0.429339	0.463099	0.107562		0.41312	0.445604	0.141276
RU88-4 grungy		51.085	0.502	2.69	0.062	9.445	0.275	15.713	18.742	0.297	nd	98.811		1.91159	0.0141319	0.118634	0.00183428	0.0496409	0.245936	0.00871605	0.876538	0.751434	0.0215477	nd	4	0.0884125	0.0302211	0.201845	0.747826	0.780898	1.12247	0.0816964		0.400998	0.467759	0.131243		0.39065	0.455688	0.153662
RU88-5 grungy		50.933	0.49	2.496	0.086	10.384	0.332	16.411	17.36	0.253	nd	98.745		1.90702	0.0138022	0.110142	0.00254582	0.0640398	0.261114	0.0105288	0.916012	0.696433	0.0183662	nd	4	0.0929831	0.0171593	0.245257	0.738026	0.778177	1.17713	0.083745		0.371717	0.488916	0.139368		0.359431	0.472756	0.167813
RU88-6 grungy		50.3	0.544	3.041	0.047	10.803	0.31	15.459	17.891	0.27	nd	98.665		1.89157	0.0153904	0.13478	0.00139742	0.0695782	0.270179	0.00987423	0.866658	0.720882	0.0196863	nd	4	0.108425	0.0263551	0.257527	0.718375	0.762342	1.13684	0.0973307		0.388047	0.466517	0.145436		0.374038	0.449675	0.176287
RU88-7 grungy		50.884	0.441	2.509	0.027	10.981	0.338	15.263	17.516	0.296	nd	98.255		1.92452	0.0125481	0.11184	0.000807383	0.0349132	0.312425	0.0108279	0.860583	0.709825	0.0217059	nd	4	0.0754755	0.0363646	0.111749	0.71245	0.733655	1.17301	0.0720852		0.376998	0.457068	0.165933		0.370135	0.448747	0.181118
RU88-8 grungy		50.072	0.632	3.077	0.125	9.743	0.272	15.812	18.751	0.276	nd	98.76		1.87449	0.0177993	0.13576	0.00369975	0.0959959	0.209039	0.00862468	0.882441	0.752119	0.0200328	nd	4	0.12551	0.0102491	0.459225	0.743123	0.808481	1.09148	0.109945		0.407962	0.478651	0.113386		0.387771	0.454961	0.157267
RU88-9 grungy		51.662	0.487	1.884	0.066	8.856	0.283	16.017	19.492	0.207	nd	98.954		1.92929	0.0136821	0.0829205	0.0019487	0.0441734	0.232414	0.00895156	0.891699	0.779932	0.0149879	nd	4	0.0707094	0.0122111	0.190063	0.763254	0.793247	1.12411	0.0583332		0.409619	0.468318	0.122063		0.400331	0.4577	0.141969
RU88-10grungy		51.505	0.374	1.754	0.047	9.096	0.303	16.736	18.04	0.239	nd	98.094		1.93452	0.010568	0.0776442	0.00139571	0.0481791	0.237543	0.00963948	0.937103	0.725998	0.0174047	nd	4	0.0654752	0.012169	0.202823	0.766343	0.797775	1.17465	0.0617439		0.381975	0.493045	0.12498		0.372532	0.480856	0.146613
RU88-11grungy		50.952	0.468	2.447	0.085	8.668	0.241	16.204	19.129	0.236	nd	98.43		1.90799	0.0131843	0.107995	0.00251656	0.0642828	0.207174	0.00764394	0.90458	0.767503	0.0171345	nd	4	0.0920141	0.0159807	0.310283	0.769176	0.813651	1.11175	0.08278		0.408408	0.48135	0.110243		0.3949	0.465429	0.139671
RU88-12patchy zoning?		50.755	0.345	3.456	0.042	6.918	0.197	15.326	21.424	0.221	nd	98.684		1.892	0.00967518	0.151835	0.00123784	0.0595426	0.156129	0.00622007	0.851692	0.855693	0.0159727	nd	4	0.107996	0.0438384	0.381369	0.79794	0.845083	1.00782	0.104619		0.459182	0.457036	0.0837818		0.444965	0.442885	0.11215
RU88-13patchy zoning?		51.715	0.225	3.502	0.128	4.702	0.093	16.338	22.862	0.164	nd	99.729		1.8927	0.00619504	0.151055	0.00370381	0.0590921	0.0848262	0.00288293	0.891404	0.896506	0.0116373	nd	4	0.107302	0.0437533	0.696626	0.860992	0.913108	0.97623	0.106549		0.478715	0.47599	0.0452953		0.464071	0.46143	0.0744985
RU88-14patchy zoning?		51.133	0.347	2.359	0.062	9.712	0.302	16.62	18.002	0.215	nd	98.752		1.91003	0.00975136	0.103854	0.00183107	0.0703248	0.233075	0.00955502	0.925509	0.720499	0.0155712	nd	4	0.0899705	0.0138831	0.301726	0.753114	0.798827	1.15858	0.086039		0.383431	0.492532	0.124037		0.369599	0.474764	0.155637
RU88-15patchy zoning?		50.789	0.524	2.371	0	10.557	0.336	14.665	18.882	0.297	nd	98.421		1.92091	0.0149096	0.105687	0	0.0444541	0.289469	0.0107637	0.826856	0.765172	0.021779	nd	4	0.0790909	0.0265966	0.153571	0.712329	0.740695	1.11632	0.0710507		0.406683	0.439467	0.15385		0.397296	0.429324	0.173381
RU210 matrix 1.1 core		53.321	0.177	1.887	0.42	3.486	0.108	17.516	23.57	0.174	0.017	100.676		1.92594	0.00480967	0.0803289	0.0119941	0.0591399	0.0461631	0.00330411	0.943172	0.912176	0.0121854	0.00078334	4	0.0740568	0.00627211	1.28111	0.899566	0.953339	0.989335	0.0774062		0.479711	0.496012	0.0242771		0.465242	0.48105	0.0537082
RU210 matrix 1.2 mid		53.152	0.22	1.672	0.467	3.272	0.109	17.441	23.391	0.176	0.019	99.919		1.9343	0.00602317	0.0717127	0.0134368	0.0474957	0.0520877	0.00335983	0.946209	0.91207	0.0124183	0.000882095	4	0.0656956	0.00601717	0.91184	0.904777	0.947823	0.998297	0.0669496		0.477432	0.495302	0.0272658		0.46585	0.483287	0.0508633
RU210 matrix 1.3 edge		52.87	0.152	1.944	0.343	3.687	0.109	17.347	23.201	0.185	0.014	99.852		1.92573	0.00416511	0.0834519	0.00987764	0.060601	0.0517112	0.00336278	0.941934	0.905454	0.0130648	0.000650534	4	0.0742728	0.00917919	1.17191	0.893467	0.947958	0.993645	0.0796578		0.476781	0.49599	0.0272293		0.462037	0.480652	0.0573109
RU210 matrix 2.1 core		49.699	0.824	4.128	0.069	8.492	0.189	14.358	21.247	0.498	0.024	99.528		1.84641	0.0230305	0.180748	0.00202676	0.115362	0.148488	0.0059474	0.795214	0.845768	0.0358718	0.00113749	4	0.153594	0.0271537	0.776911	0.750865	0.842654	0.943702	0.144543		0.472636	0.444385	0.0829789		0.444012	0.417472	0.138516
RU210 matrix 2.2 edge		51.342	0.634	2.496	0.066	7.536	0.251	16.147	20.585	0.323	0.027	99.407		1.89952	0.0176464	0.108835	0.00193058	0.0793533	0.15382	0.00786556	0.89058	0.816009	0.0231695	0.00127435	4	0.100484	0.00835118	0.515883	0.792505	0.852719	1.0444	0.0896351		0.438618	0.478701	0.0826809		0.420675	0.459118	0.120207
RU210 matrix 3.1 "core" may be altered		52.578	0.193	2.101	0.563	3.72	0.087	17.04	23.089	0.244	0.018	99.633		1.92124	0.00530556	0.0904812	0.0162652	0.0582903	0.0553909	0.00269267	0.928234	0.903975	0.0172867	0.000839085	4	0.078761	0.0117201	1.05235	0.890892	0.943687	0.983625	0.0862757		0.478902	0.491754	0.0293446		0.464556	0.477023	0.0584212
RU210 matrix 3.2 mid may be altered		50.467	0.46	3.7	0.21	6.851	0.169	15.532	21.799	0.287	0.028	99.503		1.8637	0.0127797	0.161036	0.00613141	0.10175	0.109837	0.00528616	0.855078	0.862538	0.0205491	0.00131911	4	0.136305	0.0247318	0.926372	0.801637	0.886169	0.964915	0.132613		0.471989	0.467907	0.060104		0.447095	0.443228	0.109676
RU210 matrix 3.3 mid may be altered		51.567	0.6	2.211	0.009	8.528	0.276	15.69	20.509	0.309	0.017	99.716		1.9102	0.0167207	0.0965272	0.000263586	0.0723709	0.191822	0.00865967	0.866443	0.814001	0.0221926	0.000803362	4	0.0898036	0.00672363	0.377281	0.766332	0.818739	1.05826	0.0793582		0.434768	0.462778	0.102455		0.418588	0.445555	0.135857
RU210 matrix 4.1 core		51.006	0.396	3.663	0.044	5.31	0.129	15.693	23.045	0.228	0.019	99.533		1.87594	0.0109569	0.158777	0.00127945	0.0833076	0.08002	0.00401858	0.860426	0.908129	0.0162583	0.00089147	4	0.124064	0.0347131	1.04108	0.840462	0.914913	0.940446	0.1193		0.491259	0.465454	0.0432874		0.470075	0.445382	0.0845432
RU210 matrix 4.2 mid		50.649	0.43	4.337	0.08	5.416	0.132	15.458	22.916	0.226	0.022	99.666		1.8612	0.0118874	0.18783	0.00232426	0.080809	0.0856352	0.00410848	0.846809	0.902266	0.0161018	0.00103134	4	0.138803	0.0490277	0.943642	0.835733	0.908161	0.932444	0.132161		0.491776	0.461549	0.0466751		0.471029	0.442078	0.0868925
RU210 matrix 4.3 edge		50.985	0.305	3.682	0.108	5.161	0.128	15.74	22.997	0.229	0.024	99.359		1.87715	0.00844798	0.15977	0.00314379	0.083369	0.0755435	0.00399165	0.863916	0.907196	0.0163469	0.00112726	4	0.122852	0.0369176	1.10359	0.844634	0.919588	0.939459	0.12343		0.491264	0.467827	0.0409083		0.470044	0.447619	0.0823371
RU210 matrix 4.4 edge		50.528	0.525	4.41	0.04	5.712	0.159	15.38	22.695	0.224	0.021	99.694		1.85817	0.0145248	0.191137	0.00116302	0.0792734	0.0964012	0.00495263	0.843179	0.894246	0.0159715	0.000985209	4	0.141833	0.0493041	0.822328	0.827576	0.8974	0.93958	0.129741		0.487639	0.459792	0.0525684		0.467433	0.44074	0.0918273
RU210 matrix 5.1 core		51.355	0.73	2.293	0	9.189	0.36	14.905	20.728	0.425	0.03	100.015		1.90402	0.0203614	0.100195	0	0.0830206	0.2019	0.0113051	0.823816	0.823416	0.0305507	0.00141894	4	0.0959844	0.00421067	0.411196	0.743022	0.803162	1.02572	0.0872313		0.445298	0.445515	0.109186		0.426165	0.426372	0.147463
RU210 matrix 5.1 core		50.676	0.749	2.874	0.009	8.528	0.338	14.689	20.889	0.427	0.024	99.215		1.89107	0.0210273	0.1264	0.000265535	0.0811806	0.184966	0.0106834	0.817161	0.835212	0.0308942	0.00114254	4	0.108932	0.0174679	0.438896	0.754321	0.815427	1.00213	0.098914		0.454577	0.444753	0.10067		0.435342	0.425933	0.138725
RU210 matrix 5.2 mid		50.583	0.684	2.901	0	9.042	0.291	14.818	20.237	0.373	0.027	98.956		1.8935	0.0192626	0.127986	0	0.0748438	0.208226	0.00922657	0.826916	0.811674	0.0270716	0.00128938	4	0.106497	0.0214892	0.359435	0.744979	0.798843	1.03514	0.096333		0.439499	0.447752	0.112749		0.422381	0.430313	0.147305
RU210 matrix 5.3 edge		50.712	0.665	3.063	0	9.183	0.253	14.659	20.6	0.368	0.017	99.52		1.88912	0.0186367	0.134478	0	0.0773876	0.208702	0.00798282	0.814076	0.822226	0.0265792	0.000807895	4	0.110876	0.0236021	0.370804	0.739957	0.795946	1.02278	0.10099		0.44565	0.441233	0.113118		0.42771	0.42347	0.14882
RU210 matrix 6.1 core		52.7	0.261	2.046	0.277	4.122	0.121	17.04	22.845	0.156	0.027	99.608		1.92875	0.00718626	0.0882523	0.00801529	0.0441872	0.0819787	0.00375091	0.929707	0.895841	0.0110697	0.00126062	4	0.0712485	0.0170038	0.539008	0.88051	0.918968	1.01169	0.0692063		0.469635	0.487389	0.0429764		0.459002	0.476354	0.0646437
RU210 matrix 6.2 mid		50.966	0.42	3.837	0.27	4.876	0.096	15.666	23.192	0.199	0.018	99.571		1.87394	0.0116177	0.166273	0.00784896	0.0698005	0.0801356	0.00298973	0.858703	0.913664	0.0141864	0.000844312	4	0.126063	0.0402092	0.87103	0.851348	0.914644	0.938839	0.117859		0.493205	0.463537	0.043258		0.475296	0.446705	0.0779982
RU210 matrix 6.3 edge		51.078	0.505	2.924	0	10.003	0.364	14.942	18.509	0.304	0.04	98.697		1.92158	0.0142926	0.129645	0	0.022706	0.292013	0.0115988	0.837999	0.746073	0.0221739	0.00191973	4	0.0784214	0.0512237	0.0777569	0.726977	0.741584	1.13001	0.0739298		0.397675	0.446674	0.15565		0.39292	0.441333	0.165747
RU210 matrix 7.1 core		49.765	0.821	4.237	0.257	8.616	0.188	14.77	20.94	0.367	0.019	99.987		1.84085	0.0228472	0.184717	0.00751623	0.107599	0.158944	0.0058903	0.814488	0.829935	0.0263211	0.00089661	4	0.159154	0.0255626	0.676958	0.753436	0.836718	0.973432	0.140678		0.460214	0.451648	0.0881376		0.434301	0.426218	0.139481
RU210 matrix 7.2 mid		50.321	0.853	3.509	0.068	9.115	0.285	14.937	19.976	0.4	0.027	99.51		1.87245	0.0238785	0.153886	0.00200053	0.0815891	0.202064	0.0089824	0.828583	0.796424	0.028858	0.00128169	4	0.127547	0.0263396	0.403779	0.744971	0.803945	1.03065	0.109929		0.435902	0.453503	0.110594		0.417269	0.434118	0.148614
RU210 matrix 7.3 edge		49.954	0.814	3.318	0.051	9.044	0.269	14.874	20.291	0.362	0.013	99.016		1.86846	0.0229052	0.146266	0.00150819	0.0963733	0.186532	0.00852219	0.829376	0.813187	0.0262522	0.000620315	4	0.131543	0.0147234	0.516657	0.745653	0.816388	1.01591	0.112605		0.444584	0.453435	0.101981		0.422332	0.43074	0.146928
RU210 clast 1.1		48.806	0.712	5.957	0.041	6.409	0.114	14.114	22.632	0.243	0.021	99.05		1.81369	0.0199052	0.260899	0.00120461	0.0892094	0.109972	0.00358823	0.781899	0.901129	0.0175082	0.000995556	4	0.18631	0.0745891	0.811202	0.796978	0.876695	0.891871	0.165003		0.502582	0.436084	0.061334		0.478761	0.415416	0.105823
RU210 clast 2.1 core		51.109	0.368	3.797	0.315	5.055	0.095	15.914	22.329	0.234	0.031	99.262		1.88316	0.0102008	0.164887	0.00917646	0.05738	0.0983887	0.00296483	0.87414	0.881524	0.0167167	0.00145717	4	0.116836	0.0480513	0.583197	0.848755	0.898832	0.972529	0.114608		0.475458	0.471475	0.0530668		0.461185	0.457322	0.0814932
RU210 clast 2.2 mid		49.229	0.807	5.229	0.414	6.869	0.209	14.433	21.807	0.302	0.018	99.337		1.82773	0.0225404	0.228805	0.0121525	0.0810872	0.132194	0.0065724	0.798839	0.867485	0.0217392	0.000852552	4	0.172267	0.056538	0.613393	0.789272	0.858013	0.931033	0.149778		0.482333	0.444165	0.0735019		0.461525	0.425003	0.113472
RU210 clast 2.3 edge		48.901	0.649	5.791	0.49	6.37	0.154	14.577	22.027	0.289	0.005	99.254		1.81185	0.0180903	0.252879	0.0143541	0.0938813	0.103503	0.00483294	0.805163	0.874448	0.0207609	0.000236337	4	0.188149	0.0647302	0.90704	0.803117	0.886093	0.908666	0.172966		0.490405	0.451549	0.0580462		0.465877	0.428964	0.10516
RU210 clast 3.1 core		49.406	0.732	5.053	0.134	7.279	0.139	14.157	21.691	0.394	0.024	99.025		1.8407	0.0205169	0.221875	0.00394714	0.0813452	0.145455	0.00438636	0.786295	0.865879	0.0284606	0.0011407	4	0.1593	0.0625748	0.559247	0.776131	0.84389	0.93175	0.147867		0.481678	0.437407	0.0809149		0.460825	0.41847	0.120704
RU210 clast 3.2 core		48.967	0.886	4.917	0.034	8.097	0.186	13.982	21.64	0.429	0.006	99.144		1.8262	0.0248586	0.216123	0.00100253	0.112059	0.140486	0.00587549	0.777366	0.864722	0.0310204	0.000285465	4	0.173798	0.042325	0.797654	0.75479	0.846941	0.917851	0.155386		0.485098	0.436092	0.0788105		0.456406	0.410299	0.133295
RU210 clast 4.1 core		49.207	0.505	4.982	0	7.272	0.162	14.456	21.982	0.301	0.028	98.9		1.83266	0.0141496	0.218682	0	0.110759	0.115746	0.00511042	0.802628	0.877196	0.0217353	0.00133036	4	0.167338	0.0513448	0.956922	0.779907	0.873967	0.918374	0.162104		0.488534	0.447005	0.0644617		0.460149	0.421033	0.118817
RU210 clast 5.1 core		48.777	0.695	5.597	0.118	6.898	0.133	14.216	22.242	0.274	0.017	98.989		1.81583	0.0194645	0.245568	0.0034731	0.100947	0.113813	0.00419371	0.788949	0.887174	0.0197768	0.000807358	4	0.184166	0.0614014	0.886956	0.786034	0.873928	0.902762	0.165821		0.495646	0.44077	0.0635848		0.469185	0.417239	0.113576
Ru47B-91 1.1		53.181	0.193	2.357	0.17	5.97	0.186	17.284	20.311	0.247	0.052	99.958		1.94334	0.00530576	0.10151	0.00491152	0.0162027	0.166244	0.00575695	0.94156	0.795241	0.0174999	0.00242411	4	0.0566557	0.044854	0.0974631	0.837682	0.849934	1.1078	0.0659682		0.417878	0.494765	0.0873568		0.41435	0.490588	0.0950615
Ru47B-91 1.2		52.958	0.268	2.697	0.171	6.744	0.209	17.382	19.552	0.221	0.033	100.235		1.93237	0.00735683	0.115983	0.0049332	0.0167966	0.189003	0.00645939	0.945518	0.764407	0.0156349	0.00153614	4	0.0676278	0.0483553	0.0888696	0.821248	0.833407	1.13452	0.0700852		0.402547	0.497922	0.0995316		0.399017	0.493556	0.107427
Ru47B-91 1.3		53.055	0.267	1.968	0.343	7.372	0.221	17.075	19.298	0.204	0.02	99.856		1.95142	0.00738808	0.0853106	0.0099745	0.00259447	0.224171	0.00688496	0.936256	0.760518	0.0145478	0.000938447	4	0.0485848	0.0367259	0.0115736	0.80502	0.80682	1.16043	0.0492949		0.395908	0.487393	0.116698		0.395374	0.486736	0.11789
Ru47B-91 1.4		52.876	0.272	2.669	0.386	6.401	0.192	17.469	19.856	0.204	0.022	100.347		1.92648	0.0074554	0.114606	0.011119	0.0218419	0.173197	0.00592506	0.948821	0.775124	0.0144105	0.00102255	4	0.0735225	0.0410839	0.12611	0.82949	0.845638	1.12202	0.0740447		0.408575	0.500132	0.0912937		0.403924	0.494439	0.101637
Ru47B-91 2.1		53.295	0.161	2.291	0.31	5.885	0.185	17.411	20.067	0.243	0.065	99.913		1.94773	0.00442655	0.0986784	0.00895732	0.00829922	0.17157	0.00572664	0.948586	0.785776	0.0172184	0.00303048	4	0.0522696	0.0464088	0.0483722	0.840606	0.846834	1.12016	0.0636654		0.412279	0.497702	0.090019		0.410492	0.495544	0.0939643
Ru47B-91 2.2		53.164	0.266	2.262	0.328	6.7	0.212	17.705	19.328	0.194	0.026	100.185		1.94056	0.00730447	0.09731	0.00946581	0.0124297	0.192099	0.00655439	0.963422	0.755912	0.0137295	0.00121071	4	0.0594371	0.0378729	0.0647049	0.824883	0.833756	1.15552	0.0597684		0.395469	0.504032	0.1005		0.392914	0.500775	0.106311
Ru47B-91 2.3		52.947	0.233	2.455	0.4	5.986	0.171	17.694	19.868	0.221	0.031	100.02		1.93208	0.00639643	0.105582	0.0115403	0.0229944	0.159685	0.00528527	0.962546	0.776807	0.0156358	0.00144312	4	0.0679155	0.0376668	0.143999	0.840486	0.857707	1.12223	0.0722016		0.409053	0.50686	0.0840874		0.404159	0.500796	0.095045
Ru47B-91 2.4		53.276	0.252	1.997	0.299	6.521	0.209	17.774	19.549	0.223	0.013	100.113		1.94477	0.00692045	0.0859151	0.00862942	0.018462	0.180614	0.00646203	0.967236	0.764602	0.0157829	0.000605392	4	0.0552296	0.0306855	0.102218	0.829311	0.84265	1.14785	0.0577769		0.399802	0.505757	0.0944411		0.395979	0.500921	0.103099
Ru47B-91 3.1		52.565	0.295	3.264	0.244	7.659	0.21	17.401	18.573	0.242	0.014	100.499		1.91602	0.00808951	0.140219	0.0070318	0.0222861	0.211191	0.00648348	0.945558	0.725369	0.0171026	0.00065101	4	0.0839813	0.056238	0.105526	0.801976	0.817427	1.15675	0.0855559		0.385401	0.50239	0.112209		0.380891	0.496511	0.122598
Ru47B-91 3.2		52.827	0.234	3.192	0.286	6.762	0.197	17.27	19.35	0.222	0.023	100.378		1.92534	0.00641599	0.13711	0.0082412	0.00789987	0.198208	0.00608139	0.938326	0.755624	0.0156873	0.00106939	4	0.0746631	0.0624467	0.0398565	0.819904	0.825603	1.13653	0.0785878		0.399345	0.495903	0.104752		0.397685	0.493841	0.108474
Ru47B-91 4.1		52.406	0.345	3.006	0.209	7.088	0.242	17.308	19.261	0.221	0.016	100.102		1.91622	0.00949029	0.129541	0.00604204	0.0294183	0.18733	0.00749488	0.943455	0.754599	0.0156675	0.000746345	4	0.083784	0.0457569	0.15704	0.813181	0.834336	1.13078	0.0812173		0.400236	0.500405	0.099359		0.394087	0.492717	0.113196
Ru47B-91 4.2		52.204	0.349	2.952	0.26	7.824	0.239	17.737	17.465	0.228	0.017	99.284		1.9243	0.00967811	0.128245	0.00757732	0.0133227	0.227871	0.00746195	0.974673	0.68978	0.0162947	0.000799417	4	0.0757034	0.0525413	0.0584662	0.801628	0.81051	1.20254	0.0734413		0.364515	0.515067	0.120418		0.361967	0.511466	0.126568
Ru47B-91 4.3		53.077	0.256	2.195	0.381	6.565	0.209	17.287	19.967	0.201	0.015	100.168		1.94068	0.00704181	0.0945882	0.011014	0.0139015	0.186846	0.00647262	0.942276	0.78223	0.0142491	0.000699673	4	0.0593193	0.0352689	0.0744009	0.824371	0.834521	1.12912	0.0601845		0.409255	0.492989	0.0977561		0.4063	0.489429	0.104271
Ru47B-91 4.4		53.201	0.239	2.308	0.288	5.605	0.165	16.925	21.171	0.24	0.02	100.186		1.94232	0.00656441	0.0993096	0.00831318	0.0125308	0.158606	0.00510236	0.921171	0.828164	0.0169885	0.000931509	4	0.0576812	0.0416284	0.0790057	0.843325	0.853112	1.07978	0.0624724		0.434062	0.482809	0.0831297		0.431229	0.479659	0.0891121
Ru47B-91 5.1		52.786	0.218	2.287	0.35	6.148	0.203	17.275	20.239	0.222	0.019	99.747		1.93482	0.00601139	0.0987967	0.0101429	0.0260665	0.162395	0.00630236	0.943953	0.794849	0.0157768	0.000888447	4	0.0651818	0.0336149	0.160513	0.833575	0.853215	1.10635	0.0698243		0.418078	0.496504	0.0854175		0.412424	0.489789	0.0977873
Ru47B-91 5.2		52.581	0.279	2.313	0.427	6.72	0.211	17.241	19.931	0.237	0.023	99.963		1.92605	0.00768847	0.0998548	0.0123663	0.0382083	0.167654	0.00654647	0.941482	0.782243	0.0168318	0.00107479	4	0.0739499	0.025905	0.2279	0.820575	0.848843	1.10914	0.0764796		0.413584	0.497775	0.088641		0.405394	0.487919	0.106687
Ru47B-91 5.3		53.374	0.182	1.909	0.292	6.416	0.184	17.742	19.796	0.171	0.014	100.121		1.94934	0.00500063	0.0821708	0.00843167	0.0134872	0.182483	0.00569194	0.965984	0.774655	0.0121087	0.000652291	4	0.0506649	0.0315058	0.0739092	0.831345	0.841108	1.14847	0.0534247		0.402811	0.5023	0.0948888		0.400006	0.498802	0.101192
Ru47B-91 5.4		53.031	0.258	2.165	0.519	6.915	0.188	17.283	19.637	0.216	0.026	100.247		1.93922	0.00709762	0.0933059	0.0150051	0.0155891	0.195885	0.00582291	0.942163	0.769388	0.0153142	0.0012129	4	0.0607841	0.0325218	0.0795827	0.816689	0.827876	1.13805	0.0631159		0.403362	0.493942	0.102695		0.400093	0.489938	0.109969
Ru47B-91 5.4.2		52.852	0.289	2.529	0.192	6.96	0.191	17.346	19.798	0.23	0.006	100.4		1.92698	0.00792703	0.108672	0.00553466	0.0325165	0.179707	0.00589841	0.942814	0.773412	0.0162588	0.000279077	4	0.0730199	0.0356525	0.180942	0.816263	0.839908	1.12252	0.0737037		0.407932	0.497282	0.0947855		0.401054	0.488897	0.110049
Ru47B-91 5.5		52.465	0.327	2.564	0.308	7.893	0.233	16.359	19.687	0.316	0.017	100.172		1.92726	0.00903681	0.111005	0.0089453	0.0307588	0.211724	0.00724958	0.895856	0.774862	0.0225062	0.000796665	4	0.0727401	0.0382652	0.145278	0.786985	0.808841	1.10758	0.0779693		0.411626	0.475901	0.112473		0.405008	0.46825	0.126742
Ru47B-91 5.6		53.306	0.235	2.71	0.139	6.939	0.174	17.241	19.87	0.249	0.031	100.914		1.93398	0.00641416	0.115877	0.00398716	0.0183066	0.192236	0.005347	0.932498	0.772408	0.0175153	0.00143481	4	0.0660247	0.0498528	0.0952297	0.815805	0.829083	1.12473	0.0721465		0.407143	0.491528	0.101329		0.403252	0.48683	0.109918
Ru47B-91 5.7		52.653	0.297	2.722	0.432	6.513	0.181	17.185	19.925	0.203	0.022	100.145		1.92488	0.00816835	0.11728	0.0124864	0.0195478	0.179579	0.00560461	0.936572	0.780465	0.0143887	0.00102603	4	0.0751181	0.0421619	0.108854	0.824666	0.839108	1.11615	0.0741961		0.411504	0.493812	0.094684		0.407306	0.488774	0.10392
Ru47B-91 6.1		52.646	0.245	2.184	0.244	6.821	0.216	17.479	19.6	0.233	0.027	99.706		1.93146	0.00676212	0.0944337	0.00707756	0.0398872	0.169397	0.00671212	0.955976	0.77046	0.0165737	0.00126369	4	0.0685426	0.0258911	0.235466	0.820397	0.849475	1.12537	0.0728558		0.406396	0.504251	0.0893522		0.398022	0.493861	0.108117
Ru47B-91 6.2		52.461	0.24	2.892	0.297	6.774	0.186	17.187	19.466	0.238	0.025	99.767		1.92377	0.00662101	0.124988	0.00861086	0.0237133	0.184031	0.00577717	0.939565	0.764834	0.0169214	0.00116953	4	0.0762318	0.0487565	0.128855	0.818929	0.836212	1.1236	0.0810807		0.40501	0.497538	0.097452		0.399988	0.491368	0.108645
Ru47B-91 6.3		52.384	0.343	3.097	0.325	6.142	0.166	16.751	20.514	0.231	0.02	99.973		1.91793	0.00944766	0.133638	0.00940785	0.01954	0.168526	0.00514787	0.914291	0.804744	0.0163979	0.000934156	4	0.0820744	0.0515633	0.115946	0.829396	0.844363	1.08282	0.0805112		0.42634	0.484377	0.0892826		0.421972	0.479414	0.0986138
Ru47B-91 7.1		53.56	0.242	1.855	0.204	6.267	0.172	17.532	20.221	0.168	0.024	100.255		1.95412	0.00664238	0.0797646	0.00588458	0.00582157	0.185401	0.00531528	0.953572	0.790475	0.0118841	0.00111707	4	0.0458772	0.0338874	0.0313999	0.832963	0.837221	1.13897	0.0455935		0.40969	0.49422	0.0960902		0.408457	0.492733	0.0988093
Ru47B-91 7.2		53.289	0.253	2.152	0.377	6.601	0.196	17.78	19.461	0.252	0.024	100.427		1.93995	0.00692901	0.0923317	0.010851	0.0219546	0.179016	0.0060436	0.964931	0.759089	0.0177868	0.00111461	4	0.0600469	0.0322848	0.12264	0.827627	0.84351	1.14395	0.0650903		0.398883	0.507048	0.0940685		0.394334	0.501265	0.104401
Ru47B-91 7.3		53.341	0.235	2.186	0.398	5.658	0.186	17.561	20.443	0.194	0.018	100.222		1.94355	0.00644169	0.0938728	0.0114655	0.00921763	0.163194	0.00574029	0.953882	0.798093	0.0137051	0.000836688	4	0.0564488	0.037424	0.0564827	0.846921	0.85391	1.11708	0.0581071		0.416722	0.498067	0.0852112		0.414726	0.495681	0.0895929
Ru47B-91 8.1		52.635	0.342	3.112	0.252	6.546	0.204	17.143	19.806	0.229	0.015	100.313		1.92016	0.00938611	0.1338	0.00726837	0.0167366	0.182977	0.00630346	0.932309	0.774165	0.0161973	0.000698088	4	0.079841	0.0539592	0.0914683	0.823578	0.835937	1.11529	0.0779642		0.40973	0.493429	0.0968412		0.406133	0.489096	0.104771
Ru47B-91 8.2		52.783	0.322	3.032	0.253	6.289	0.204	16.854	20.179	0.214	0.026	100.18		1.92946	0.00885512	0.130625	0.007312	0.00181361	0.190448	0.00631623	0.918449	0.790342	0.015167	0.00121247	4	0.0705406	0.0600842	0.0095229	0.826903	0.828255	1.1089	0.0692098		0.416136	0.483588	0.100276		0.415739	0.483127	0.101134
Ru47B-91 9.1		52.605	0.237	3.324	0.19	6.47	0.195	17.064	19.31	0.254	0.018	99.682		1.9292	0.00653877	0.14367	0.00550907	0	0.198437	0.0060572	0.932916	0.758765	0.0180605	0.000842131	4	0.0707965	0.0728738	0	0.824602	0.824602	1.13135	0.0783828		0.401438	0.493575	0.104987		0.401438	0.493575	0.104987
Ru47B-91 9.2		53.622	0.235	2.007	0.392	6.947	0.193	17.413	19.324	0.2	0.028	100.374		1.95818	0.00645615	0.0863796	0.011318	0	0.212165	0.0059697	0.947967	0.756102	0.0141607	0.00130444	4	0.0418226	0.0445569	0	0.81712	0.81712	1.16013	0.0558749		0.394577	0.494703	0.11072		0.394577	0.494703	0.11072
Ru47B-91 9.3		52.61	0.23	2.695	0.137	6.52	0.213	17.655	19.125	0.281	0.022	99.488		1.92914	0.00634484	0.116469	0.00397183	0.0295928	0.170353	0.00661548	0.965104	0.7514	0.0199777	0.00102914	4	0.0708581	0.0456107	0.173715	0.82838	0.84997	1.13546	0.0791753		0.398228	0.511488	0.0902839		0.392079	0.50359	0.104331
Ru203 1.1		50.384	0.64	3.948	0.003	7.431	0.185	14.886	21.793	0.265	0.024	99.559		1.86645	0.0178361	0.172367	8.78654e-05	0.0791457	0.151072	0.00580471	0.822076	0.864996	0.0190333	0.0011342	4	0.133553	0.0388145	0.523894	0.781223	0.844759	0.973148	0.118048		0.470581	0.447231	0.0821872		0.451156	0.42877	0.120075
Ru203 1.2		49.905	0.603	5.006	0.007	7.146	0.126	14.515	22.364	0.226	0.013	99.915		1.84147	0.0167392	0.217704	0.000204217	0.0824502	0.138072	0.00393802	0.798452	0.884188	0.0161686	0.000611957	4	0.158528	0.0591759	0.597153	0.783584	0.85257	0.936524	0.14183		0.485628	0.438538	0.0758341		0.464589	0.41954	0.115871
Ru203 1.3		51.145	0.573	2.979	0.04	8.45	0.266	15.184	20.522	0.288	0.022	99.469		1.90092	0.0160218	0.130493	0.00117542	0.0562429	0.206412	0.00837392	0.841313	0.81725	0.0207538	0.00104313	4	0.0990789	0.0314138	0.272478	0.762081	0.80299	1.04773	0.0888321		0.438209	0.451112	0.110678		0.425381	0.437906	0.136713
Ru203 1.4		49.914	0.581	4.554	0.036	7.481	0.213	14.402	21.998	0.264	0.021	99.464		1.85275	0.0162243	0.199224	0.0010565	0.081773	0.150459	0.00669667	0.796943	0.874885	0.0189995	0.000994418	4	0.147254	0.0519698	0.543491	0.774351	0.841188	0.947401	0.134799		0.480103	0.437331	0.0825659		0.459484	0.418549	0.121967
Ru203 2.1		50.7	0.737	3.985	0	7.63	0.213	14.517	21.679	0.435	0.032	99.951		1.87316	0.0204848	0.17352	0	0.0718619	0.163892	0.00666549	0.799566	0.858183	0.0311602	0.00150825	4	0.126842	0.0466785	0.43847	0.772289	0.829892	0.963458	0.11854		0.471104	0.438926	0.0899696		0.453225	0.422268	0.124507
Ru203 3.1		50.653	0.439	4.536	0.077	5.66	0.127	15.229	22.705	0.19	0.013	99.644		1.86487	0.0121592	0.196821	0.00224134	0.0610455	0.113227	0.00396035	0.835846	0.895653	0.0135626	0.000610582	4	0.135127	0.0616946	0.539142	0.827473	0.880697	0.949073	0.124981		0.485521	0.4531	0.0613788		0.469969	0.438587	0.0914446
Ru203 3.2		49.845	0.478	5.412	0.086	5.671	0.093	14.799	22.825	0.203	0.022	99.451		1.83909	0.0132681	0.23534	0.00250873	0.0729835	0.102005	0.00290637	0.814002	0.902334	0.0145219	0.00103553	4	0.160905	0.0744343	0.715487	0.823063	0.888641	0.916008	0.149927		0.49624	0.447662	0.056098		0.477091	0.430387	0.0925218
Ru203 3.3		51.836	0.326	3.123	0.128	5.106	0.147	16.316	22.633	0.181	0.015	99.811		1.89873	0.0089835	0.134821	0.00370693	0.0596056	0.0968101	0.00456073	0.890954	0.888275	0.0128545	0.000700937	4	0.101273	0.0335485	0.615696	0.850659	0.901991	0.987765	0.096861		0.473484	0.474912	0.0516035		0.458904	0.460288	0.080808
Ru203 3.4		52.044	0.519	1.925	0.006	8.189	0.281	15.782	19.98	0.31	0.011	99.056		1.93932	0.0145494	0.0845406	0.000176769	0.0304546	0.224744	0.00886895	0.876703	0.797718	0.0223968	0.000522912	4	0.0606755	0.0238651	0.135508	0.77454	0.795955	1.10145	0.0544965		0.420036	0.461625	0.118339		0.413407	0.45434	0.132254
Ru203 4.1		51.936	0.241	2.854	0.131	4.123	0.106	16.781	23.023	0.157	0.03	99.393		1.90329	0.00664433	0.123267	0.00379561	0.0656222	0.0607405	0.00329025	0.916781	0.904009	0.0111553	0.00140254	4	0.0967077	0.026559	1.08037	0.878864	0.937863	0.977521	0.0959768		0.480465	0.487253	0.0322825		0.464272	0.470831	0.0648961
Ru203 4.2		52.207	0.245	3.03	0.179	4.222	0.093	16.57	22.99	0.16	0.033	99.735		1.90884	0.00673911	0.130568	0.00517448	0.0459892	0.0831108	0.00288011	0.903177	0.900643	0.0113424	0.00153925	4	0.0911642	0.0394039	0.553348	0.874937	0.915734	0.986288	0.0905676		0.477306	0.478649	0.0440455		0.465949	0.46726	0.0667901
Ru203 4.3		52.117	0.232	2.726	0.179	4.202	0.123	16.641	23.192	0.154	0.023	99.597		1.90819	0.00639038	0.117631	0.00518165	0.060038	0.0686287	0.00381446	0.908305	0.909817	0.0109322	0.0010743	4	0.0918125	0.0258186	0.874824	0.875921	0.929751	0.976934	0.0910382		0.482214	0.481412	0.036374		0.467342	0.466566	0.0660918
Ru203 5.1		52.112	0.25	3.219	0.098	4.265	0.125	16.283	23.304	0.167	0.012	99.85		1.90491	0.00687502	0.13868	0.00283228	0.0473109	0.0830731	0.0038702	0.887324	0.912728	0.0118358	0.000559596	4	0.0950887	0.0435909	0.569509	0.871885	0.914393	0.970397	0.0937341		0.484688	0.471197	0.0441145		0.472809	0.459649	0.0675412
Ru203 7.1		51.111	0.494	2.841	0.068	7.371	0.216	15.456	21.12	0.261	0.018	98.956		1.90302	0.0138373	0.124668	0.00200175	0.0593216	0.1702	0.00681189	0.857898	0.84255	0.0188414	0.000854982	4	0.0969846	0.027683	0.348541	0.78893	0.834452	1.0281	0.0890064		0.450406	0.45861	0.0909843		0.436561	0.444514	0.118925
Ru203 7.2		52.176	0.343	2.905	0.168	5.544	0.152	16.369	21.826	0.171	0.012	99.671		1.91664	0.00947895	0.125768	0.00487924	0.0298619	0.140456	0.00472932	0.8964	0.859048	0.0121789	0.00056235	4	0.0833628	0.0424051	0.212606	0.840335	0.864537	1.03686	0.0771462		0.453107	0.472809	0.074084		0.446081	0.465477	0.0884417
Ru203 7.3		51.915	0.33	2.03	0.007	7.513	0.301	15.5	21.149	0.302	0.027	99.074		1.93196	0.00923882	0.0890341	0.000205958	0.0514296	0.182394	0.00948764	0.8599	0.843276	0.02179	0.00128182	4	0.0680378	0.0209964	0.281971	0.786214	0.825008	1.04229	0.0726319		0.447226	0.456043	0.0967312		0.435352	0.443934	0.120714
Ru203 7.4		51.887	0.317	2.653	0.143	5.779	0.155	16.635	21.336	0.169	0.027	99.101		1.91551	0.00880404	0.11543	0.00417384	0.0451348	0.133287	0.00484667	0.915502	0.843943	0.0120964	0.00127159	4	0.0844893	0.0309406	0.33863	0.836898	0.872914	1.04879	0.0802492		0.445886	0.483694	0.0704202		0.435501	0.472428	0.0920711
Ru203 8.1		51.796	0.438	2.24	0	7.544	0.319	15.597	20.589	0.331	0.024	98.878		1.93036	0.0122804	0.0983888	0	0.0413797	0.193753	0.0100698	0.866552	0.822153	0.0239175	0.00114107	4	0.0696354	0.0287534	0.213569	0.78657	0.817267	1.06031	0.0701331		0.436744	0.46033	0.102926		0.42735	0.450429	0.122221
Ru203 8.2		51.673	0.408	2.301	0.006	7.7	0.295	15.432	20.039	0.327	0.014	98.195		1.94051	0.0115268	0.101841	0.000178146	0.0183905	0.22344	0.00938339	0.863942	0.80631	0.0238091	0.000670712	4	0.0594918	0.0423494	0.0823062	0.781302	0.794516	1.08738	0.060918		0.425787	0.456221	0.117992		0.421692	0.451833	0.126475
Ru203 8.3		50.949	0.656	3.055	0.009	8.173	0.311	15.046	20.894	0.319	0.022	99.434		1.8938	0.0183442	0.133833	0.000264493	0.0656547	0.188412	0.00979138	0.833737	0.832134	0.0229897	0.00104322	4	0.106204	0.0276292	0.348464	0.766441	0.815671	1.02215	0.0935484		0.448763	0.449628	0.101609		0.433417	0.434252	0.132331
Ru203 8.4		51.105	0.459	2.669	0.015	9.139	0.318	15.733	19.53	0.247	0.024	99.239		1.90318	0.0128596	0.117144	0.000441654	0.0693022	0.21533	0.0100307	0.873453	0.77928	0.0178344	0.00114021	4	0.0968163	0.0203279	0.321842	0.754222	0.802229	1.08878	0.0900717		0.417159	0.467571	0.115269		0.402237	0.450846	0.146917
Ru203 9.1		50.485	0.592	4.142	0.02	7.097	0.187	14.776	22.056	0.245	0.027	99.627		1.86825	0.0164813	0.18065	0.000585162	0.0681611	0.151481	0.00586138	0.815154	0.874526	0.0175785	0.00127465	4	0.131753	0.048897	0.449965	0.787744	0.843291	0.966635	0.117643		0.474986	0.442739	0.0822746		0.45803	0.426934	0.115037
Ru203 9.2		50.446	0.646	4.222	0.014	7.146	0.189	14.701	22.098	0.257	0.027	99.773		1.86525	0.0179696	0.183985	0.000409271	0.0688723	0.152101	0.00591912	0.810339	0.87546	0.0184241	0.00127359	4	0.134754	0.0492309	0.452805	0.785736	0.841963	0.962441	0.118513		0.476337	0.440905	0.0827582		0.459132	0.424979	0.115889
Ru203 10.2		50.535	0.727	3.835	0.042	6.776	0.217	15.037	21.547	0.401	0.021	99.138		1.87526	0.0202955	0.167721	0.00123223	0.0697861	0.1405	0.00682047	0.831841	0.856701	0.0288508	0.000994132	4	0.124743	0.0429785	0.496699	0.798215	0.855504	0.972341	0.113997		0.468388	0.454796	0.0768161		0.451174	0.438081	0.110745
Ru203 10.3		50.788	0.601	3.844	0.03	6.544	0.155	15.448	21.719	0.335	0.016	99.48		1.87464	0.0166889	0.167222	0.00087549	0.0739764	0.128031	0.00484589	0.85004	0.858954	0.0239743	0.000753412	4	0.125362	0.0418602	0.5778	0.807986	0.869098	0.978071	0.116712		0.467579	0.462726	0.0696949		0.449479	0.444814	0.105708
Ru203 10.1		49.865	0.605	4.058	0.038	8.396	0.298	14.524	21.102	0.304	0.048	99.238		1.85857	0.0169642	0.178258	0.0011198	0.0938143	0.167897	0.00940772	0.80701	0.842713	0.0219685	0.00228234	4	0.141435	0.0368231	0.55876	0.755117	0.827781	0.974907	0.131757		0.463635	0.443993	0.092372		0.44088	0.422201	0.136919
Ru203 c1.1		51.797	0.451	2.425	0.011	8.113	0.279	15.62	20.394	0.301	0.025	99.436		1.92238	0.0125924	0.106072	0.000322776	0.0465066	0.20531	0.0087705	0.864223	0.810981	0.0216593	0.00118367	4	0.0776216	0.0284504	0.226519	0.774366	0.808038	1.06953	0.0752798		0.431255	0.459568	0.109177		0.420847	0.448476	0.130677
Ru203 c1.2		51.754	0.436	2.422	0.002	8.458	0.309	15.86	20.087	0.275	0.023	99.63		1.91678	0.0121482	0.10572	5.85643e-05	0.0571929	0.204785	0.00969334	0.875675	0.79711	0.0197472	0.00108671	4	0.083217	0.0225031	0.279282	0.769721	0.810465	1.08046	0.0797546		0.424543	0.466387	0.109069		0.411994	0.452601	0.135406
Ru203 c1.3		51.344	0.474	2.606	0.027	8.287	0.282	15.297	20.569	0.295	0.028	99.209		1.91201	0.0132793	0.114375	0.000794949	0.0568724	0.201215	0.00889481	0.849216	0.820708	0.0212994	0.0013302	4	0.0879857	0.0263892	0.282645	0.766923	0.808445	1.05043	0.0840566		0.438614	0.45385	0.107536		0.425676	0.440462	0.133862
Ru203 c2.1		51.337	0.425	2.473	0.027	8.04	0.244	15.718	20.719	0.255	0.019	99.257		1.90714	0.0118778	0.108276	0.00079303	0.0721659	0.177625	0.00767764	0.870482	0.824697	0.0183669	0.000900454	4	0.0928614	0.0154142	0.406283	0.777027	0.830528	1.04811	0.0883731		0.440354	0.464801	0.0948443		0.424016	0.447555	0.128429
Ru203 c2.2		51.177	0.539	2.886	0.011	7.516	0.27	15.402	20.799	0.288	0.02	98.908		1.90715	0.0151111	0.126754	0.000324099	0.0501511	0.184092	0.00852238	0.855655	0.830477	0.0208088	0.000950818	4	0.0928459	0.0339082	0.272424	0.785078	0.822946	1.03975	0.0843833		0.444052	0.457515	0.098433		0.432456	0.445567	0.121978
Ru203 c3.1		51.652	0.467	2.554	0	8.22	0.268	15.695	20.331	0.3	0.027	99.514		1.91459	0.0130227	0.111574	0	0.0560361	0.198781	0.00841414	0.867283	0.807461	0.0215603	0.00127676	4	0.0854095	0.0261649	0.281899	0.77291	0.813537	1.06606	0.082201		0.430985	0.462915	0.1061		0.418469	0.449472	0.13206
Ru203 c3.2		51.262	0.48	2.719	0.011	8.497	0.321	15.383	20.718	0.288	0.024	99.707		1.89975	0.0133825	0.118758	0.000322305	0.0764859	0.186865	0.0100761	0.849869	0.822664	0.0206937	0.00113467	4	0.100252	0.0185067	0.409312	0.763433	0.819756	1.03673	0.095315		0.442436	0.457067	0.100497		0.424955	0.439008	0.136036
Ru203 c3.3		50.784	0.581	3.133	0.007	8.406	0.28	15.117	20.389	0.305	0.031	99.033		1.89494	0.0163096	0.137779	0.00020651	0.0630519	0.199265	0.00884939	0.840902	0.815153	0.0220655	0.00147566	4	0.105058	0.0327215	0.316422	0.762226	0.80843	1.04017	0.0959799		0.43936	0.453238	0.107402		0.424919	0.438341	0.136739
RU129B 1.1		51.273	0.454	3.421	0.078	7.138	0.198	15.382	21.61	0.26	0.018	99.858		1.89099	0.0125966	0.148699	0.00227441	0.0612979	0.158865	0.00618516	0.845714	0.853943	0.0185916	0.000846893	4	0.109013	0.0396859	0.385849	0.793444	0.841859	1.00458	0.103258		0.459474	0.455046	0.0854794		0.444804	0.440517	0.114679
RU129B 1.2		51.091	0.395	2.58	0	7.418	0.24	15.477	21.141	0.234	0.019	98.616		1.90926	0.0111049	0.113631	0	0.0634924	0.168341	0.00759659	0.862222	0.846489	0.0169544	0.000905798	4	0.0907364	0.0228943	0.377165	0.788097	0.836651	1.03056	0.0863867		0.450967	0.459349	0.0896839		0.436212	0.44432	0.119468
RU129B 1.3		51.389	0.348	2.796	0.015	7.34	0.197	15.523	20.865	0.235	0.013	98.743		1.91692	0.00976583	0.122921	0.000442382	0.0408888	0.188091	0.00622422	0.863215	0.833922	0.0169959	0.000618632	4	0.0830845	0.0398362	0.217389	0.790349	0.821088	1.05131	0.0811674		0.442345	0.457884	0.0997709		0.432955	0.448164	0.118882
RU129B 2.1		51.975	0.434	2.009	0	10.499	0.348	15.671	18.53	0.256	0.017	99.739		1.93434	0.0121514	0.0881198	0	0.0381728	0.288607	0.0109699	0.869453	0.738904	0.0184724	0.000807131	4	0.0656579	0.0224619	0.132266	0.726826	0.750784	1.15806	0.0606347		0.389519	0.458339	0.152141		0.381836	0.449298	0.168866
RU129B 2.2		52.178	0.407	1.877	0	10.349	0.335	15.76	18.713	0.235	0.025	99.879		1.93849	0.0113754	0.0821855	0	0.0361958	0.28535	0.0105416	0.872857	0.744893	0.0169273	0.00118487	4	0.06151	0.0206755	0.126847	0.730789	0.753628	1.15821	0.0568713		0.39141	0.45865	0.14994		0.384105	0.45009	0.165805
RU129B 3.1		51.849	0.346	3.172	0.13	5.87	0.166	15.912	22.371	0.202	0.017	100.035		1.9009	0.00954314	0.137059	0.00376821	0.0534456	0.126535	0.00515481	0.869669	0.878775	0.0143587	0.000795103	4	0.0991025	0.0379561	0.42238	0.828533	0.872983	0.996203	0.09517		0.468686	0.463829	0.0674859		0.455696	0.450974	0.0933302
RU129B 3.2		51.878	0.312	2.855	0.138	5.445	0.161	16.122	22.502	0.169	0.006	99.609		1.90805	0.00863292	0.123756	0.00401291	0.0512004	0.116283	0.00501555	0.883967	0.88675	0.0120514	0.000281523	4	0.0919512	0.031805	0.440308	0.840712	0.883746	1.00025	0.0870183		0.469926	0.468451	0.0616233		0.457512	0.456076	0.0864119
RU129B 3.3		51.648	0.453	2.183	0.019	10.208	0.312	15.696	19.024	0.244	0.025	99.845		1.91883	0.0126613	0.0955855	0.000558099	0.0596285	0.257542	0.00981803	0.869327	0.757285	0.0175759	0.0011849	4	0.081167	0.0144186	0.231529	0.732684	0.771454	1.12687	0.0746051		0.401923	0.461389	0.136688		0.389594	0.447235	0.163172
RU129B 4.1		51.911	0.47	1.559	0	11.604	0.387	15.69	18.038	0.233	0.017	99.921		1.93472	0.0131781	0.0684795	0	0.0533611	0.308328	0.0122168	0.871753	0.720314	0.0168368	0.000808286	4	0.0652759	0.00320359	0.173066	0.706764	0.738723	1.18008	0.0565647		0.379034	0.458722	0.162244		0.368682	0.446193	0.185125
RU129B 4.2 altered edge????		52.022	0.438	1.896	0	11.004	0.35	15.984	18.106	0.258	0.024	100.098		1.92952	0.0122218	0.0828811	0	0.0533227	0.288013	0.0109955	0.883809	0.719547	0.0185535	0.00113561	4	0.0704791	0.012402	0.18514	0.721392	0.754218	1.17182	0.0657247		0.380437	0.467286	0.152277		0.370006	0.454473	0.175522
RU129B 5.1		51.106	0.628	2.664	0.003	10.494	0.321	15.036	18.953	0.241	0.016	99.462		1.91088	0.0176652	0.117395	8.86864e-05	0.0436556	0.284494	0.0101661	0.838118	0.759301	0.0174712	0.0007632	4	0.0891178	0.0282775	0.15345	0.718633	0.746579	1.12261	0.0720219		0.403473	0.445354	0.151173		0.394326	0.435257	0.170417
RU129B 5.2		51.531	0.564	2.177	0.003	11.364	0.386	15.791	17.506	0.241	0.018	99.602		1.92384	0.0158408	0.0957884	8.85513e-05	0.0430677	0.311745	0.012206	0.878861	0.700263	0.0174446	0.000857292	4	0.0761621	0.0196263	0.13815	0.712393	0.738163	1.19061	0.0627825		0.370339	0.464792	0.164869		0.362092	0.454442	0.183467
RU129B c1.1		50.686	0.531	3.128	0.098	9.252	0.279	15.164	19.595	0.272	0.018	99.03		1.89525	0.0149372	0.137848	0.0028972	0.059463	0.229859	0.00883625	0.845284	0.78505	0.0197193	0.000858632	4	0.104752	0.0330955	0.258693	0.745002	0.786206	1.07514	0.0954557		0.422026	0.454406	0.123567		0.408953	0.440331	0.150716
RU129B c2.1		51.376	0.547	2.553	0.047	9.261	0.288	15.787	19.225	0.244	0.033	99.381		1.91218	0.0153162	0.111988	0.00138305	0.0508185	0.237448	0.00907917	0.875947	0.766669	0.0176077	0.00156689	4	0.087824	0.0241645	0.21402	0.752394	0.786735	1.11339	0.076366		0.407789	0.465913	0.126298		0.397056	0.453651	0.149292
RU175 7.0		52.782	0.274	2.186	0.303	3.467	0.097	16.745	23.83	0.186	0.028	99.902		1.92498	0.00751777	0.0939607	0.00873691	0.0467529	0.058993	0.0029964	0.91041	0.931193	0.0131522	0.00130273	4	0.0750156	0.0189451	0.792517	0.895935	0.939145	0.969403	0.074435		0.489948	0.479013	0.0310392		0.478185	0.467513	0.0543025
RU175 8.0		50.142	0.481	4.591	0.052	5.586	0.1	14.925	23.156	0.244	0.016	99.298		1.85255	0.0133693	0.199908	0.00151896	0.0849694	0.0876292	0.00312935	0.82204	0.916654	0.0174784	0.000754127	4	0.147451	0.0524567	0.969647	0.826471	0.903669	0.909669	0.138945		0.501912	0.450106	0.0479812		0.479599	0.430096	0.0903046
RU175-91 1.1 core		52.774	0.164	1.78	0.781	2.697	0.08	17.158	22.902	0.223	0.017	98.602		1.94546	0.00454823	0.077335	0.0227628	0.0166301	0.0665177	0.00249791	0.942929	0.904584	0.0159386	0.000799479	4	0.0545432	0.0227919	0.25001	0.918965	0.934105	1.00945	0.0621848		0.472607	0.49264	0.0347527		0.468536	0.488397	0.043067
RU175-91 2.1 core		51.646	0.251	2.566	0.067	4.122	0.107	16.405	22.737	0.172	0.022	98.121		1.9194	0.00701779	0.112393	0.00196869	0.0462305	0.0818863	0.00336821	0.908901	0.905393	0.0123937	0.00104306	4	0.0805957	0.0317978	0.564569	0.876457	0.917352	0.990788	0.0799969		0.477482	0.479333	0.0431849		0.466118	0.467924	0.0659576
RU175-91 3.1 small (bad analysis?)		50.879	0.302	2.989	0.155	4.433	0.116	15.72	22.841	0.214	0.022	97.69		1.90365	0.00850067	0.131804	0.00458516	0.0558762	0.0828363	0.00367615	0.876824	0.915669	0.0155241	0.00105009	4	0.0963464	0.035458	0.674537	0.86341	0.913682	0.959661	0.0959193		0.488271	0.467557	0.0441716		0.474144	0.454029	0.0718269
RU175-91 4.1 small		53.012	0.152	1.459	0.286	3.144	0.087	17.238	23.089	0.202	0.029	98.723		1.95183	0.00421026	0.0633109	0.00832546	0.0320587	0.0647511	0.00271315	0.946163	0.910852	0.01442	0.00136214	4	0.0481668	0.0151442	0.495107	0.907179	0.935948	1.01091	0.0555283		0.473966	0.49234	0.0336935		0.466189	0.484262	0.0495489
RU175-91 5.1 small		49.692	0.464	4.181	0	6.694	0.122	14.373	22.803	0.296	0.029	98.658		1.85521	0.0130323	0.183968	0	0.102354	0.106653	0.00385791	0.799954	0.912164	0.0214261	0.00138121	4	0.14479	0.0391782	0.959692	0.792849	0.88236	0.906607	0.141532		0.501528	0.439832	0.0586402		0.474807	0.416399	0.108794
Ru217 1.1 core 22794		51.173	0.443	2.152	0.022	9.952	0.362	15.603	18.602	0.302	0.024	98.635		1.92204	0.0125176	0.0952616	0.000653307	0.0581167	0.254491	0.0115164	0.873655	0.748608	0.0219924	0.00114998	4	0.0779622	0.0172994	0.228364	0.736477	0.774416	1.12815	0.0760694		0.398885	0.465514	0.135602		0.386904	0.451531	0.161565
Ru217 1.2 mid		50.045	0.617	2.994	0	10.698	0.356	14.973	18.522	0.314	0.016	98.545		1.88703	0.0175025	0.133053	0	0.0816138	0.255742	0.0113698	0.84166	0.748306	0.0229557	0.000769651	4	0.112973	0.0200797	0.319125	0.713867	0.766957	1.0974	0.101693		0.40543	0.456009	0.13856		0.388262	0.436699	0.175039
Ru217 1.3 edge		50.034	0.583	3.406	0.024	8.105	0.237	14.787	21.026	0.317	0.023	98.542		1.87567	0.0164421	0.150484	0.000711337	0.0887264	0.165378	0.00752532	0.826383	0.844542	0.0230406	0.00109995	4	0.124333	0.0261513	0.536507	0.764824	0.833248	0.991761	0.115589		0.459914	0.450025	0.0900602		0.438716	0.429283	0.132
Ru217 2.1 core		48.604	0.529	5.871	0.439	6.166	0.128	14.102	22.507	0.207	0.021	98.59		1.81528	0.0148636	0.258427	0.0129631	0.0843137	0.108281	0.00404918	0.785168	0.900665	0.0149895	0.00100057	4	0.184721	0.0737066	0.77866	0.803026	0.878806	0.893449	0.170983		0.502011	0.437636	0.0603532		0.479478	0.417992	0.10253
Ru217 2.2 mid		48.705	0.525	5.784	0.329	6.048	0.108	14.282	22.668	0.212	0.026	98.687		1.81482	0.0147169	0.254005	0.00969236	0.0937821	0.0946869	0.00340855	0.79334	0.904997	0.0153158	0.00123592	4	0.185181	0.0688244	0.990445	0.808039	0.893374	0.888027	0.172299		0.504732	0.442459	0.0528085		0.479645	0.420467	0.0998878
Ru217 2.3 edge		49.415	0.464	5.117	0.174	6.425	0.115	14.464	22.502	0.209	0.025	98.916		1.83848	0.0129872	0.224373	0.00511828	0.0838321	0.116081	0.00362397	0.802232	0.897007	0.0150762	0.00118658	4	0.161518	0.0628556	0.722183	0.800514	0.873593	0.918313	0.151806		0.494132	0.441923	0.0639454		0.47232	0.422416	0.105265
Ru217 3.1 mid		50.999	0.297	3.583	0.302	5.2	0.11	15.918	22.51	0.194	0.022	99.138		1.88225	0.00824649	0.155854	0.00881245	0.0692572	0.0912475	0.0034387	0.87582	0.890155	0.0138823	0.00103585	4	0.117749	0.0381047	0.759004	0.845121	0.905645	0.967068	0.116174		0.479293	0.471575	0.0491311		0.462063	0.454622	0.083315
Ru217 3.2 mid		51.33	0.276	3.173	0.228	5.012	0.126	15.947	22.308	0.218	0.023	98.645		1.90317	0.00769861	0.138654	0.00668367	0.0496848	0.105728	0.00395697	0.881447	0.886219	0.0156714	0.0010879	4	0.09683	0.0418236	0.469933	0.850112	0.892899	0.987174	0.0981921		0.473056	0.470508	0.0564364		0.460834	0.458352	0.0808144
Ru217 4.1 edge		51.354	0.334	2.552	0.041	7.759	0.21	15.769	20.175	0.266	0.033	98.515		1.91987	0.0093938	0.112443	0.00121187	0.048667	0.193923	0.00664972	0.878846	0.808138	0.0192808	0.00157387	4	0.0801276	0.0323157	0.250961	0.783679	0.819232	1.07277	0.0821946		0.429653	0.467246	0.103101		0.418817	0.455461	0.125722
Ru217 4.2 mid		51.781	0.375	2.216	0.027	8.046	0.232	16.361	19.716	0.218	0.023	98.995		1.92514	0.0104887	0.0970995	0.000793652	0.047651	0.202522	0.00730578	0.906803	0.78539	0.0157142	0.00109088	4	0.0748582	0.0222413	0.235288	0.78377	0.817437	1.10932	0.0706859		0.414516	0.478596	0.106888		0.404347	0.466855	0.128798
Ru217 4.3 edge		51.119	0.368	2.947	0.141	7.206	0.187	15.907	20.848	0.242	0.029	98.994		1.89816	0.0102801	0.128969	0.00413947	0.068798	0.154978	0.00588138	0.880543	0.82945	0.0174225	0.00137374	4	0.101835	0.027134	0.44392	0.797363	0.850338	1.03552	0.100071		0.444752	0.472148	0.0830996		0.428929	0.455351	0.11572
Ru217 5.1 mid		49.87	0.357	4.206	0.065	6.698	0.164	15.265	21.825	0.233	0.022	98.705		1.85548	0.00999269	0.184434	0.00191207	0.100558	0.107858	0.00516829	0.846691	0.870053	0.0168081	0.00104423	4	0.144519	0.0399155	0.932318	0.802469	0.887006	0.954549	0.142385		0.476845	0.464041	0.0591132		0.451938	0.439803	0.108259
Ru217 5.2 edge		50.677	0.435	3.809	0.141	6.152	0.149	15.612	21.964	0.203	0.017	99.159		1.87521	0.0121095	0.166114	0.00412508	0.0704851	0.119896	0.00466994	0.861209	0.870813	0.014564	0.000802499	4	0.124788	0.0413255	0.587884	0.818959	0.877795	0.981105	0.115936		0.470222	0.465036	0.0647416		0.452981	0.447986	0.0990329
Ru217 6.1 mid		50.544	0.479	2.349	0	10.889	0.368	14.915	18.612	0.287	0.025	98.468		1.90991	0.0136168	0.104612	0	0.0705633	0.273549	0.0117782	0.84019	0.753548	0.0210266	0.00120515	4	0.0900886	0.0145234	0.257955	0.709439	0.754387	1.11374	0.0850867		0.403552	0.449952	0.146495		0.388858	0.433568	0.177574
OR-55C		50.091	0.636	4.353	0.054	8.352	0.182	15.213	20.889	0.381	0.021	100.166		1.84314	0.0176057	0.188774	0.00157097	0.116322	0.140693	0.00567227	0.834498	0.823553	0.0271812	0.000985769	4	0.156856	0.0319187	0.826774	0.764533	0.855727	0.975191	0.149811		0.457849	0.463934	0.0782176		0.430039	0.435754	0.134207
OR-55C		50.787	0.554	3.622	0.076	7.732	0.198	15.577	21.094	0.345	0.015	100.026		1.86927	0.01534	0.157117	0.0022116	0.0967769	0.141224	0.00617263	0.8547	0.831864	0.0246197	0.000704315	4	0.130731	0.0263861	0.68527	0.78219	0.858198	0.995925	0.125375		0.45512	0.467614	0.0772652		0.432235	0.4441	0.123665
OR-55C		50.095	0.676	4.263	0.053	8.406	0.223	15.265	20.491	0.37	0.029	99.88		1.8493	0.0187739	0.185474	0.0015469	0.104689	0.15483	0.00697273	0.840078	0.810493	0.0264824	0.00136573	4	0.150705	0.0347688	0.676157	0.763987	0.844378	0.994907	0.141005		0.448927	0.465314	0.0857593		0.424322	0.439811	0.135868
OR-55C		50.806	0.42	3.496	0.071	8.16	0.217	15.538	20.497	0.413	0.029	99.674		1.87702	0.0116735	0.152223	0.00207389	0.0992644	0.152859	0.00679047	0.855776	0.811369	0.0295834	0.00136681	4	0.122979	0.029244	0.649386	0.772431	0.84845	1.00863	0.130582		0.445806	0.470205	0.0839881		0.422749	0.445887	0.131364
OR-55C		50.865	0.551	3.501	0.065	7.904	0.206	15.514	20.59	0.361	0.021	99.608		1.88114	0.0153303	0.152598	0.0019006	0.0794276	0.165038	0.00645292	0.855338	0.815894	0.0258854	0.000990784	4	0.118856	0.0337429	0.481267	0.777719	0.838257	1.02038	0.115071		0.444321	0.465802	0.089877		0.425899	0.446489	0.127612
OR-55C		51.304	0.515	3.175	0.1	7.764	0.207	16.221	20.582	0.331	0.032	100.207		1.88102	0.0142052	0.137196	0.00289879	0.0944713	0.143595	0.00642835	0.886608	0.808546	0.0235297	0.00149675	4	0.118975	0.018221	0.657903	0.788325	0.860615	1.0302	0.115591		0.439726	0.48218	0.0780936		0.418238	0.458617	0.123145
OR-55C		50.436	0.563	3.948	0.084	8.23	0.212	15.526	20.439	0.403	0.012	99.867		1.85968	0.0156172	0.171565	0.00244878	0.104767	0.149018	0.00662094	0.85343	0.807479	0.0288102	0.000564463	4	0.14032	0.0312449	0.70305	0.77079	0.851346	1.00245	0.138461		0.446139	0.471527	0.0823336		0.421728	0.445727	0.132546
OR-55C		49.428	0.671	4.644	0.08	8.437	0.206	15.031	20.799	0.386	0.024	99.733		1.82776	0.0186666	0.202392	0.00233889	0.131222	0.129695	0.00645207	0.8286	0.824067	0.0276744	0.00113218	4	0.17224	0.0301519	1.01178	0.76052	0.864661	0.958294	0.163713		0.462346	0.464889	0.0727656		0.430641	0.433009	0.13635
OR-55C		49.296	0.776	5.213	0.125	8.527	0.209	14.812	20.746	0.383	0.013	100.105		1.81737	0.0215224	0.226503	0.00364347	0.120055	0.142848	0.00652626	0.81406	0.819484	0.0273763	0.000611409	4	0.18263	0.0438736	0.840441	0.755884	0.850719	0.956908	0.167572		0.461319	0.458266	0.0804148		0.432115	0.429255	0.13863
OR-55C		49.91	0.684	4.667	0.112	8.181	0.178	14.678	20.279	0.408	0.022	99.141		1.85824	0.0191588	0.204789	0.00329691	0.0676077	0.187128	0.00561333	0.81469	0.808976	0.0294523	0.00104495	4	0.141757	0.0630322	0.361291	0.761802	0.813212	1.00182	0.133937		0.446752	0.449908	0.10334		0.430672	0.433715	0.135613
OR-55C		49.598	0.73	4.737	0.059	8.489	0.194	14.82	20.446	0.401	0.019	99.511		1.83965	0.02037	0.207075	0.0017302	0.100896	0.162431	0.00609478	0.819463	0.812555	0.0288376	0.000899043	4	0.160352	0.0467231	0.62116	0.756807	0.834574	0.981894	0.149349		0.452816	0.456665	0.0905187		0.428711	0.432356	0.138934
OR-55C		50.211	0.727	4.088	0	8.751	0.222	15.032	20.872	0.372	0.018	100.333		1.8494	0.0201448	0.177459	0	0.110858	0.158704	0.00692583	0.825392	0.823703	0.0265656	0.000845788	4	0.150598	0.0268614	0.69852	0.753814	0.838731	0.984096	0.137719		0.455639	0.456573	0.0877886		0.429312	0.430192	0.140495
OR-55C		51.188	0.526	3.449	0.165	7.555	0.197	15.99	20.689	0.348	0.028	100.136		1.87881	0.0145244	0.149198	0.00478821	0.0854149	0.146494	0.00612446	0.874933	0.813634	0.024765	0.00131108	4	0.121187	0.0280112	0.583059	0.790477	0.856579	1.02143	0.118214		0.443382	0.476787	0.0798308		0.423663	0.455581	0.120756
OR-55C		50.873	0.446	3.584	0.165	7.311	0.181	15.258	21.231	0.359	0.022	99.464		1.88333	0.0124214	0.156373	0.00482945	0.0740968	0.152255	0.0056755	0.842069	0.84214	0.0257679	0.00103901	4	0.116668	0.0397055	0.486661	0.788143	0.846876	0.994325	0.118632		0.458566	0.458527	0.0829068		0.440781	0.440745	0.118474
OR-55C		49.798	0.582	4.535	0.149	7.96	0.165	15.005	21.127	0.41	0.026	99.809		1.83877	0.0161672	0.197355	0.00434986	0.119	0.126808	0.00516042	0.825966	0.835848	0.0293524	0.00122474	4	0.161231	0.0361236	0.938426	0.770653	0.866906	0.952774	0.159474		0.467314	0.461789	0.0708972		0.438162	0.432982	0.128856
OR-55C		49.832	0.698	4.715	0.076	8.67	0.205	15.146	20.857	0.364	0.025	100.582		1.82764	0.0192591	0.203807	0.00220379	0.127236	0.138697	0.0063683	0.828118	0.819614	0.0258839	0.00116971	4	0.172356	0.0314517	0.917366	0.756929	0.856543	0.966814	0.160891		0.4588	0.463561	0.0776391		0.428296	0.432739	0.138965
OR-55C		49.199	0.596	4.423	0.089	7.689	0.294	14.312	20.739	0.42	0.023	97.804		1.85638	0.0169182	0.19669	0.00265506	0.085885	0.156748	0.00939604	0.805049	0.838442	0.0307259	0.00110712	4	0.143617	0.0530734	0.547919	0.76841	0.837026	0.961797	0.141614		0.465739	0.44719	0.0870705		0.444532	0.426827	0.128641
OR-55C		51.567	0.375	3.248	0.098	7.523	0.205	16.038	20.162	0.333	0.03	99.577		1.90257	0.0104087	0.141234	0.0028587	0.0551791	0.176949	0.00640633	0.882125	0.797034	0.0238209	0.00141204	4	0.0974283	0.0438059	0.311836	0.791673	0.832921	1.05907	0.101844		0.429411	0.475255	0.0953336		0.417014	0.461534	0.121451
OR-55C		51.078	0.54	3.423	0.042	7.941	0.189	15.751	21.016	0.397	0.018	100.413		1.87194	0.0148884	0.14785	0.00121697	0.106325	0.137065	0.00586687	0.860552	0.825244	0.0282094	0.000841564	4	0.128059	0.0197909	0.775726	0.779527	0.862608	0.997617	0.127333		0.452719	0.472089	0.0751921		0.427768	0.44607	0.126162
OR-55C		51.243	0.465	3.301	0.076	7.453	0.196	15.671	21.001	0.348	0.018	99.773		1.88908	0.0128963	0.143422	0.00221515	0.0761295	0.153652	0.00612009	0.861238	0.829526	0.0248736	0.000846535	4	0.11092	0.0325025	0.495466	0.789388	0.848602	1.01489	0.110847		0.44975	0.466944	0.0833067		0.431922	0.448434	0.119644
OR-55C		50.684	0.481	3.475	0.047	8.016	0.197	15.508	20.73	0.385	0.029	99.542		1.87436	0.0133821	0.151458	0.00137421	0.10066	0.147258	0.00617069	0.854965	0.821401	0.0276049	0.00136816	4	0.125641	0.0258163	0.683561	0.775209	0.853069	1.00222	0.12785		0.450422	0.468827	0.0807502		0.426861	0.444303	0.128836
OR-55C		49.581	0.748	4.791	0.104	8.208	0.156	14.517	21.065	0.361	0.021	99.594		1.83961	0.020879	0.209504	0.00305083	0.0934258	0.161267	0.00490255	0.802969	0.837426	0.0259694	0.000994001	4	0.160388	0.0491163	0.579324	0.759192	0.832751	0.964236	0.145593		0.464808	0.445682	0.0895101		0.441893	0.423711	0.134396
OR-55C		51.058	0.559	3.354	0.056	7.615	0.176	15.558	21.504	0.334	0.027	100.269		1.87525	0.0154456	0.145182	0.00162614	0.0968536	0.137048	0.00547512	0.851843	0.84623	0.023784	0.00126507	4	0.124752	0.0204301	0.706713	0.78457	0.861412	0.988891	0.11891		0.46113	0.464189	0.0746806		0.438013	0.440918	0.121069
OR-55C		49.293	0.663	4.823	0.082	8.61	0.197	14.403	21.061	0.41	0.019	99.586		1.82965	0.0185137	0.210986	0.00240641	0.12069	0.146582	0.00619348	0.796977	0.837597	0.029506	0.000899689	4	0.170352	0.0406341	0.823362	0.748863	0.84465	0.943559	0.163731		0.470255	0.447449	0.082296		0.440413	0.419054	0.140533
OR-55C		49.695	0.719	4.77	0.063	8.536	0.194	14.882	20.446	0.422	0.022	99.773		1.83801	0.0200061	0.207926	0.00184226	0.105495	0.158538	0.00607748	0.820555	0.810248	0.0302616	0.00103804	4	0.161988	0.0459382	0.665423	0.756559	0.838077	0.979093	0.153275		0.452819	0.458579	0.0886014		0.427609	0.433048	0.139344
OR-55C		53.379	0.129	1.595	0.579	3.238	0.102	17.789	23.044	0.173	0.027	100.039		1.93775	0.003523	0.0682405	0.016618	0.0460299	0.0522742	0.00313626	0.962695	0.89631	0.0121763	0.00125039	4	0.0622538	0.00598665	0.880546	0.907348	0.948497	1.01497	0.0686345		0.468958	0.503691	0.0273504		0.45793	0.491846	0.0502241
OR-55C		53.092	0.17	2.045	0.587	5.039	0.176	16.692	22.045	0.406	0.029	100.278		1.93439	0.00465972	0.0878137	0.0169093	0.0472142	0.106328	0.00543141	0.906636	0.860594	0.0286803	0.00134793	4	0.0656142	0.0221995	0.444045	0.855174	0.895033	1.01296	0.086323		0.459337	0.483912	0.0567517		0.448046	0.472017	0.0799376
OR-55C		50.128	0.584	4.532	0.139	7.724	0.169	15.231	20.78	0.387	0.02	99.708		1.85029	0.0162169	0.197153	0.00405647	0.0944165	0.144018	0.00528362	0.838105	0.821824	0.0276958	0.000941771	4	0.149711	0.047442	0.655586	0.778517	0.85336	0.982123	0.145915		0.45557	0.464595	0.0798352		0.432912	0.441488	0.1256
OR-55C		50.159	0.621	4.107	0.088	7.797	0.16	15.114	21.459	0.365	0.02	99.927		1.85004	0.0172314	0.17853	0.00256619	0.1114	0.129108	0.00499849	0.831042	0.84804	0.0261018	0.000941064	4	0.149958	0.0285722	0.862844	0.775552	0.865534	0.960149	0.142538		0.468999	0.459599	0.0714017		0.441782	0.432927	0.125291
OR-55C		49.556	0.669	4.686	0.042	8.659	0.17	14.701	20.594	0.399	0.022	99.55		1.83909	0.0186779	0.204957	0.00123234	0.108032	0.160714	0.00534369	0.813324	0.818881	0.0287093	0.00104156	4	0.160913	0.0440441	0.672196	0.751637	0.835002	0.974038	0.153308		0.456731	0.453631	0.0896384		0.430774	0.427851	0.141375
OR-55C		49.968	0.594	4.354	0.231	7.645	0.174	14.965	20.877	0.357	0.022	99.196		1.85637	0.0166018	0.19064	0.00678512	0.0833943	0.154135	0.00547529	0.828818	0.831025	0.0257149	0.00104268	4	0.143633	0.0470075	0.541046	0.777249	0.843192	0.982954	0.137187		0.458123	0.456906	0.0849709		0.437987	0.436824	0.125189
OR-55C		49.775	0.598	4.743	0.134	8.054	0.174	14.957	20.934	0.389	0.023	99.814		1.83816	0.0166139	0.206434	0.00391247	0.109036	0.139708	0.00544262	0.823432	0.828322	0.0278527	0.00108357	4	0.161837	0.0445967	0.78046	0.768001	0.854946	0.96314	0.157545		0.462372	0.459643	0.0779853		0.435845	0.433272	0.130884
OR-55C		50.18	0.591	4.206	0.168	7.769	0.19	15.505	20.68	0.394	0.02	99.691		1.85108	0.0164013	0.18286	0.00489978	0.106407	0.13327	0.00593654	0.85266	0.817369	0.0281795	0.000941196	4	0.148924	0.0339352	0.798436	0.780583	0.864828	0.98593	0.145242		0.453263	0.472834	0.0739034		0.428008	0.446488	0.125505
OR-55C		50.359	0.414	4.328	0.186	7.457	0.196	15.375	20.447	0.388	0.019	99.191		1.86643	0.0115433	0.18905	0.00545031	0.0783352	0.1528	0.00615285	0.849494	0.811966	0.0278811	0.000898347	4	0.133571	0.0554786	0.512663	0.78611	0.847549	1.00229	0.139264		0.447547	0.468231	0.0842219		0.429023	0.448851	0.122126
OR-55C		52.274	0.25	2.527	0.297	4.914	0.099	16.787	22.289	0.231	0.023	99.675		1.91387	0.00688594	0.10904	0.00859719	0.0583259	0.0921371	0.00307006	0.916242	0.874361	0.0163977	0.00107426	4	0.0861316	0.0229085	0.633034	0.858946	0.908628	1.00838	0.0898316		0.464409	0.486653	0.0489378		0.450454	0.47203	0.0775157
OR-55C		49.501	0.648	4.258	0.056	8.497	0.213	14.646	20.654	0.383	0.023	98.904		1.84924	0.0182117	0.187473	0.00165402	0.104809	0.16066	0.00673976	0.815659	0.826718	0.027741	0.00109613	4	0.150761	0.036712	0.652367	0.754452	0.835444	0.976319	0.143175		0.458514	0.452381	0.089105		0.433325	0.427529	0.139146
OR-55C		53.084	0.209	1.597	0.336	3.63	0.081	17.128	22.883	0.154	0.022	99.131		1.95032	0.00577679	0.0691517	0.00976015	0.0208872	0.0906496	0.00252066	0.938125	0.900804	0.01097	0.00103115	4	0.0496757	0.019476	0.230417	0.89374	0.911886	1.02877	0.0501233		0.46684	0.486181	0.046979		0.46184	0.480975	0.0571847
OR-55C		53.731	0.11	1.215	0.889	2.637	0.066	18.023	22.048	0.158	0.008	98.87		1.97145	0.00303635	0.0525403	0.0257892	0	0.0809171	0.00205112	0.985825	0.866772	0.0112399	0.000374462	4	0.0285455	0.0239949	0	0.924146	0.924146	1.06674	0.0497841		0.448289	0.509862	0.0418498		0.448289	0.509862	0.0418498
OR-55C		51.644	0.433	3.055	0.184	5.629	0.153	16.565	21.406	0.352	0.016	99.471		1.89718	0.0119667	0.132268	0.00534416	0.0699225	0.103014	0.00476064	0.907173	0.842554	0.0250712	0.000749832	4	0.102823	0.0294444	0.678765	0.83989	0.898025	1.01019	0.104711		0.454761	0.489638	0.055601		0.438222	0.471831	0.0899465
OR-55C		53.132	0.101	1.531	0.32	3.524	0.1	17.732	23.096	0.159	0.029	99.724		1.93518	0.00276748	0.0657198	0.00921488	0.0617391	0.0456031	0.00308498	0.962796	0.901315	0.0112281	0.00134747	4	0.0648165	0.000903221	1.35384	0.899693	0.954777	1.0084	0.0718572		0.471963	0.504157	0.0238795		0.457183	0.488369	0.0544482
OR-55C		49.755	0.544	5.015	0.16	7.27	0.141	14.99	21.475	0.303	0.031	99.691		1.83625	0.015104	0.218133	0.00466863	0.0976287	0.126758	0.00440758	0.824722	0.849186	0.0216811	0.00145953	4	0.163749	0.0543841	0.770195	0.786116	0.866778	0.951481	0.156681		0.471595	0.458009	0.0703953		0.447341	0.434454	0.118205
OR-55C		49.924	0.771	4.29	0.078	8.151	0.159	15.123	20.669	0.368	0.014	99.538		1.84912	0.0214835	0.187269	0.00228414	0.0963361	0.156148	0.00498813	0.835033	0.820254	0.0264269	0.000661514	4	0.150884	0.0363853	0.616954	0.767834	0.842463	0.991181	0.135005		0.45282	0.460979	0.0862013		0.429954	0.437701	0.132345
OR-55C		49.751	0.58	3.812	0.082	8.182	0.189	15.175	20.983	0.404	0.024	99.169		1.84834	0.0162108	0.166912	0.00240862	0.131817	0.122402	0.00594741	0.840464	0.83526	0.0291008	0.00113749	4	0.15166	0.0152517	1.07692	0.767769	0.872877	0.962867	0.149477		0.464517	0.467411	0.068072		0.43279	0.435487	0.131723
OR-55C		50.163	0.549	4.429	0.135	7.46	0.181	15.182	21.041	0.363	0.013	99.541		1.85458	0.0152697	0.192985	0.00394612	0.0899993	0.140659	0.00566796	0.836762	0.833495	0.0260204	0.000613144	4	0.145418	0.0475666	0.639839	0.78391	0.856092	0.977422	0.141512		0.460261	0.462066	0.077673		0.43847	0.440189	0.121341
OR-55C		49.664	0.665	4.486	0.036	8.607	0.208	14.887	20.788	0.415	0.027	99.832		1.83669	0.0185018	0.195528	0.00105262	0.124064	0.14214	0.00651544	0.820753	0.823723	0.0297568	0.00127384	4	0.163308	0.0322194	0.872825	0.755092	0.852382	0.962893	0.157336		0.461052	0.45939	0.0795584		0.431115	0.429561	0.139324
OR-55C		50.345	0.532	4.412	0.221	6.566	0.143	15.444	21.696	0.299	0.021	99.684		1.85418	0.0147403	0.191508	0.00643521	0.086545	0.115694	0.00446086	0.847944	0.856151	0.0213507	0.000986671	4	0.145816	0.0456923	0.748049	0.807425	0.87994	0.963638	0.138673		0.470467	0.465957	0.0635757		0.449109	0.444803	0.106088
Or55C 1.1core		50.16	0.456	4.748	0.273	6.133	0.111	15.352	20.96	0.3	0.027	98.543		1.86645	0.012765	0.208221	0.00803149	0.0482343	0.14262	0.00349839	0.8516	0.835651	0.0216434	0.00128168	4	0.133546	0.0746753	0.338202	0.816919	0.856551	0.994219	0.130941		0.456672	0.465388	0.0779397		0.444944	0.453436	0.10162
Or55C 1.2 mid		50.808	0.482	3.077	0.088	7.347	0.184	15.759	20.533	0.325	0.024	98.64		1.89369	0.0135151	0.135163	0.00259318	0.0724685	0.156541	0.00580871	0.875619	0.819978	0.0234857	0.00114115	4	0.106314	0.028849	0.462935	0.792682	0.848336	1.03216	0.103911		0.44272	0.472761	0.0845192		0.42605	0.45496	0.11899
Or55C 1.3 edge		50.965	0.566	2.893	0.032	7.923	0.204	15.481	20.266	0.33	0.025	98.715		1.90365	0.0159048	0.127356	0.000945015	0.0576804	0.189818	0.00645403	0.862035	0.811068	0.0238986	0.00119127	4	0.0963504	0.0310053	0.303872	0.776934	0.819539	1.05185	0.0896307		0.435374	0.462733	0.101893		0.422299	0.448836	0.128865
Or55C 2.1 core		49.723	0.492	4.171	0.276	8.23	0.289	14.377	20.75	0.405	0.032	98.757		1.86148	0.0138568	0.184033	0.00816927	0.0880558	0.169617	0.00916398	0.802378	0.832324	0.0293968	0.00152829	4	0.138523	0.0455096	0.519145	0.756924	0.825496	0.971995	0.141735		0.461295	0.444699	0.094006		0.43983	0.424006	0.136164
Or55C 2.2 mid		49.492	0.658	4.547	0.123	7.948	0.189	14.837	20.493	0.359	0.018	98.667		1.84939	0.0184976	0.20025	0.00363389	0.0872148	0.161166	0.00598192	0.826513	0.820488	0.0260095	0.000858068	4	0.150613	0.0496368	0.541148	0.768925	0.836823	0.987679	0.140486		0.453768	0.4571	0.0891325		0.432888	0.436066	0.131046
Or55C 2.3 edge		49.754	0.782	3.889	0	8.363	0.183	14.669	20.863	0.377	0.019	98.899		1.85906	0.0219821	0.171261	0	0.0948707	0.166463	0.00579166	0.817103	0.83525	0.0273119	0.000905682	4	0.140939	0.0303218	0.56992	0.757673	0.830755	0.983566	0.125192		0.459227	0.44925	0.0915229		0.436461	0.426978	0.136561
Or55C 3.1 mid		49.668	0.612	4.579	0.164	8.431	0.238	14.375	20.437	0.416	0.02	98.951		1.85559	0.017201	0.201619	0.00484422	0.0790322	0.184391	0.00753129	0.800617	0.818083	0.0301331	0.000953219	4	0.144406	0.0572135	0.428612	0.752431	0.812803	0.985008	0.14109		0.453712	0.444025	0.102264		0.43466	0.42538	0.139961
Or55C 3.2 mid		49.584	0.677	4.823	0.194	7.698	0.169	14.339	20.582	0.357	0.029	98.481		1.85934	0.0190987	0.213152	0.00575166	0.0515585	0.189856	0.00536773	0.801581	0.82695	0.0259555	0.00138731	4	0.140658	0.0724937	0.271566	0.768537	0.808504	0.991437	0.129804		0.454771	0.44082	0.104409		0.442232	0.428665	0.129103
Or55C 4.1 "core"		51.926	0.451	2.92	0.166	5.612	0.149	15.983	21.716	0.211	0.021	99.184		1.91984	0.0125445	0.127238	0.00485246	0.0192544	0.154272	0.00466609	0.880946	0.860269	0.0151254	0.000990504	4	0.0801591	0.0470792	0.124808	0.835437	0.850976	1.03522	0.071186		0.453851	0.46476	0.0813893		0.449287	0.460086	0.0906267
Or55C 4.2 mid		49.834	0.58	4.588	0.192	7.831	0.173	15.114	20.409	0.353	0.025	99.109		1.85187	0.0162147	0.200939	0.00564106	0.0838644	0.159508	0.00544525	0.837289	0.812608	0.0254334	0.00118517	4	0.148128	0.0528111	0.525771	0.774793	0.83998	0.996797	0.142317		0.449102	0.462743	0.0881548		0.429209	0.442245	0.128546
Or55C 4.3 edge		50.423	0.514	3.852	0.148	7.766	0.16	15.654	20.039	0.408	0.033	99.024		1.87207	0.0143567	0.168552	0.00434439	0.0851827	0.155952	0.00503152	0.866422	0.797156	0.0293696	0.00156302	4	0.12793	0.0406222	0.546212	0.782283	0.847461	1.02237	0.130149		0.438111	0.476179	0.0857099		0.418518	0.454883	0.126599
Or55C 5.1 mid		50.985	0.516	3.706	0.16	6.58	0.14	15.427	21.568	0.338	0.023	99.455		1.88343	0.0143402	0.16135	0.00467307	0.0637205	0.139563	0.00438048	0.849572	0.853674	0.0242086	0.00108391	4	0.116566	0.0447842	0.456571	0.806922	0.858904	0.989135	0.113178		0.463246	0.46102	0.0757339		0.447763	0.445612	0.106625
Or55C 5.2 edge		51.549	0.416	3.374	0.077	6.306	0.153	15.758	21.68	0.267	0.018	99.598		1.8993	0.0115309	0.146512	0.00224305	0.0494968	0.144814	0.00477476	0.865537	0.855869	0.0190735	0.000846063	4	0.100697	0.045815	0.341797	0.816662	0.85667	1.01035	0.0975549		0.458611	0.463792	0.0775973		0.446762	0.451809	0.10143
Or55C 5.3 edge		51.131	0.482	3.33	0.13	7.267	0.176	15.596	20.857	0.346	0.029	99.355		1.89282	0.0134236	0.145286	0.00380488	0.0646354	0.160346	0.00551852	0.860692	0.827275	0.0248339	0.00136955	4	0.107185	0.0381008	0.403099	0.792772	0.842958	1.02104	0.106541		0.447584	0.465664	0.0867528		0.432461	0.44993	0.11761
OR-54D		52.538	0.126	2.568	0.767	5.794	0.184	18.028	20.317	0.137	nd	100.497		1.9074	0.0034414	0.10988	0.022016	0.0560645	0.119855	0.00565812	0.975723	0.790318	0.00964347	nd	4	0.0925998	0.01728	0.467767	0.847244	0.890601	1.09558	0.0953605		0.419068	0.517379	0.0635536		0.406969	0.502442	0.0905888
OR-54D		53.191	0.097	1.887	0.61	3.937	0.155	18.229	21.708	0.121	nd	99.943		1.93311	0.00265208	0.0808249	0.0175276	0.0386497	0.0810112	0.00477129	0.987625	0.845303	0.00852605	nd	4	0.0668901	0.0139348	0.47709	0.891933	0.924192	1.06864	0.070112		0.441656	0.516017	0.042327		0.432914	0.505803	0.0612832
OR-54D		52.745	0.101	2.163	0.537	5.057	0.131	18.075	21.29	0.137	nd	100.253		1.91526	0.00275908	0.0925672	0.0154168	0.0656298	0.0879405	0.00402905	0.978441	0.828315	0.00964518	nd	4	0.0847433	0.00782383	0.746298	0.864339	0.917534	1.06638	0.0888704		0.437175	0.516411	0.046414		0.422539	0.499122	0.0783391
OR-54D		52.465	0.082	2.648	0.739	4.716	0.157	18.293	20.393	0.144	nd	99.659		1.91288	0.0022492	0.113787	0.0213028	0.0448304	0.0989701	0.00484846	0.994292	0.796661	0.0101795	nd	4	0.0871193	0.0266672	0.452969	0.873648	0.909473	1.09326	0.0928004		0.421531	0.526102	0.0523673		0.411764	0.513911	0.074325
OR-54D		52.145	0.116	2.477	0.695	5.822	0.184	17.811	19.65	0.133	nd	99.048		1.9208	0.00321459	0.107535	0.0202409	0.0336874	0.145666	0.00574082	0.978068	0.775545	0.00949874	nd	4	0.079197	0.0283383	0.231264	0.84504	0.870373	1.12373	0.0822665		0.408336	0.514968	0.0766957		0.40122	0.505993	0.0927868
OR-54D		52.868	0.075	2.376	0.572	5.816	0.161	18.369	20.442	0.137	nd	100.847		1.90981	0.00203824	0.101157	0.0163368	0.0684127	0.107294	0.00492616	0.989219	0.791214	0.00959536	nd	4	0.090194	0.0109634	0.637617	0.849169	0.90215	1.09651	0.0957129		0.419136	0.524027	0.0568378		0.404477	0.5057	0.0898233
OR-54D		52.809	0.043	2.412	0.776	4.857	0.152	18.778	20.162	0.107	nd	100.141		1.91524	0.00117322	0.103097	0.0222511	0.0493468	0.0979699	0.00466923	1.01526	0.783471	0.00752391	nd	4	0.0847589	0.0183385	0.503694	0.873284	0.911995	1.11323	0.0899364		0.413071	0.535276	0.0516529		0.402597	0.521702	0.0757006
OR-54D		52.956	0.06	2.419	0.645	4.74	0.146	18.427	20.977	0.146	nd	100.539		1.91385	0.00163133	0.103035	0.0184301	0.0577932	0.0854719	0.00446923	0.992794	0.81229	0.0102304	nd	4	0.0861453	0.0168897	0.676166	0.873893	0.920732	1.07827	0.093113		0.429657	0.525133	0.0452099		0.416912	0.509556	0.0735315
OR-54D		53.23	0.098	1.962	0.627	4.843	0.137	18.972	20.107	0.093	nd	100.091		1.93063	0.00267403	0.0838682	0.0179798	0.0380774	0.108824	0.00420872	1.02581	0.781384	0.00653989	nd	4	0.0693668	0.0145014	0.349899	0.874734	0.904089	1.13463	0.0705586		0.407817	0.535386	0.056797		0.39987	0.524954	0.0751762
OR-54D		53.259	0.06	2.115	0.773	3.946	0.106	18.28	21.793	0.114	nd	100.47		1.92583	0.0016322	0.0901343	0.0220993	0.0408349	0.0784953	0.00324651	0.985398	0.844337	0.00799234	nd	4	0.0741703	0.015964	0.520221	0.891982	0.926219	1.06389	0.0788982		0.442471	0.516394	0.0411351		0.433201	0.505575	0.0612243
OR-54D		53.285	0.091	2.017	0.762	3.96	0.13	18.669	21.68	0.113	nd	100.757		1.91958	0.00246627	0.0856373	0.0217036	0.0564497	0.0628573	0.00396672	1.00261	0.836827	0.00789269	nd	4	0.0804152	0.00522209	0.898062	0.893658	0.941005	1.06547	0.0833754		0.439903	0.527054	0.0330428		0.427225	0.511865	0.0609098
OR-54D		53.498	0.038	1.956	0.865	3.948	0.107	18.734	21.356	0.126	nd	100.656		1.92851	0.00103054	0.0831012	0.0246532	0.0419774	0.0770451	0.00326703	1.00676	0.824855	0.0088064	nd	4	0.0714932	0.0116079	0.544842	0.894276	0.928912	1.0838	0.0782386		0.432165	0.527469	0.0403661		0.422865	0.516118	0.0610173
OR-54D		51.891	0.109	3.197	0.255	5.15	0.144	17.242	22.049	0.12	nd	100.157		1.8881	0.00298371	0.137098	0.00733581	0.0818566	0.074858	0.00443795	0.93526	0.859601	0.00846563	nd	4	0.111896	0.0252019	1.09349	0.856485	0.925892	1.01012	0.114394		0.459749	0.500214	0.040037		0.440465	0.479233	0.0803016
OR-54D		52.247	0.09	2.582	1.108	4.616	0.138	17.578	21.462	0.138	nd	100.004		1.90545	0.00246931	0.110981	0.0319485	0.050987	0.0898027	0.00426287	0.955689	0.83865	0.00975798	nd	4	0.0945484	0.0164323	0.567767	0.871598	0.914105	1.04549	0.0993678		0.44511	0.507228	0.0476624		0.433382	0.493863	0.0727547
OR-54D		52.685	0.071	2.694	0.555	4.539	0.126	17.915	21.873	0.112	nd	100.579		1.90516	0.00193152	0.114815	0.0158676	0.062983	0.0742863	0.00385924	0.965767	0.847476	0.00785249	nd	4	0.0948379	0.0199767	0.847842	0.875553	0.928575	1.04005	0.0988274		0.448987	0.511657	0.0393564		0.434489	0.495135	0.070376
OR-54D		53.058	0.091	2.46	0.92	4.238	0.132	18.056	21.304	0.102	nd	100.397		1.92325	0.00248155	0.105093	0.0263662	0.0242424	0.104231	0.00405271	0.975703	0.827409	0.00716852	nd	4	0.0767482	0.0283451	0.232582	0.883647	0.903484	1.07993	0.0789536		0.433802	0.511551	0.0546474		0.428358	0.50513	0.0665121
OR-54D		53.173	0.085	1.685	0.708	4.366	0.144	19.176	20.723	0.133	nd	100.218		1.923	0.00231261	0.0718194	0.0202439	0.0666472	0.065403	0.00441098	1.03385	0.802997	0.00932573	nd	4	0.0718194	0	1.01902	0.886739	0.940502	1.09925	0.0868911		0.422131	0.543487	0.034382		0.407842	0.52509	0.0670683
OR-54D		52.716	0.064	2.732	0.853	5.054	0.152	17.991	21.114	0.141	nd	100.839		1.9043	0.00173928	0.116313	0.0243622	0.0571199	0.0955652	0.00465075	0.968856	0.817218	0.00987544	nd	4	0.0956991	0.020614	0.597706	0.863861	0.910219	1.06442	0.102096		0.434312	0.5149	0.0507883		0.421516	0.49973	0.0787541
OR-54D		53.432	0.05	1.612	0.637	3.838	0.12	18.258	22.258	0.151	nd	100.384		1.93342	0.0013611	0.0687454	0.0182237	0.0540691	0.062075	0.00367783	0.98489	0.862947	0.0105936	nd	4	0.0665834	0.002162	0.871029	0.894514	0.94071	1.04697	0.0744549		0.451825	0.515673	0.0325015		0.439387	0.501476	0.0591371
OR-54D		53.394	0.059	1.898	0.586	3.977	0.099	18.354	22.143	0.11	nd	100.643		1.92674	0.00160169	0.0807199	0.0167187	0.0535815	0.0664386	0.00302588	0.98735	0.856131	0.00769603	nd	4	0.0732637	0.00745623	0.806481	0.891617	0.936953	1.05379	0.0777563		0.448255	0.516959	0.034786		0.436023	0.502852	0.0611255
OR-54D		53.497	0.074	1.6	0.79	4.197	0.123	18.359	22.043	0.113	nd	100.827		1.92985	0.00200827	0.0680249	0.0225317	0.0536358	0.0729837	0.00375824	0.987309	0.851997	0.00790344	nd	4	0.0680249	0	0.734902	0.886331	0.931166	1.06029	0.0761676		0.445538	0.516297	0.0381656		0.433382	0.502211	0.0644071
OR-54D		53.617	0.04	1.504	0.664	3.899	0.115	18.555	22.585	0.135	nd	101.123		1.92478	0.00108028	0.0636329	0.0188461	0.0751949	0.0418629	0.00349673	0.993003	0.868706	0.0093963	nd	4	0.0636329	0	1.79622	0.894548	0.959548	1.03487	0.094041		0.456356	0.521652	0.0219917		0.439014	0.501829	0.0591569
OR-54D		52.871	0.053	2.617	0.781	4.977	0.158	18.322	20.15	0.137	nd	100.074		1.92122	0.00144888	0.112077	0.022438	0.0298057	0.121444	0.00486297	0.992527	0.784527	0.00965214	nd	4	0.0787833	0.033294	0.245427	0.867763	0.890981	1.11397	0.0855376		0.413236	0.522796	0.0639685		0.406848	0.514715	0.0784367
OR-54D		52.737	0.024	2.129	0.877	3.913	0.131	18.046	21.861	0.117	nd	99.878		1.91957	0.000657198	0.0913311	0.0252384	0.0512353	0.0678797	0.00403874	0.979219	0.852575	0.00825693	nd	4	0.0804311	0.0109	0.754795	0.891549	0.935174	1.0471	0.0873736		0.448801	0.515467	0.0357323		0.437014	0.50193	0.0610562
OR-54D		52.442	0.102	2.797	0.57	5.07	0.169	17.81	20.807	0.134	nd	99.925		1.91127	0.00279666	0.120141	0.0164245	0.0447735	0.109759	0.00521693	0.967647	0.812505	0.00946873	nd	4	0.0887315	0.031409	0.407927	0.862293	0.898127	1.07741	0.092607		0.429917	0.512007	0.0580761		0.419968	0.500158	0.0798746
OR-54D		52.344	0.109	2.769	0.842	4.636	0.137	17.932	21.121	0.131	nd	100.055		1.90402	0.00298283	0.118709	0.0242154	0.0523023	0.0887295	0.00422097	0.9724	0.823178	0.00923891	nd	4	0.0959767	0.0227322	0.589458	0.873336	0.916382	1.06113	0.0992499		0.43686	0.516051	0.0470886		0.425062	0.502114	0.0728241
OR-54D		52.041	0.081	3.553	0.872	4.885	0.14	18.007	21.288	0.12	nd	101.016		1.87419	0.00219457	0.150806	0.0248289	0.0799789	0.0671509	0.00427053	0.966762	0.821441	0.00837902	nd	4	0.125812	0.0249939	1.19103	0.867914	0.935052	1.03391	0.129802		0.442741	0.521066	0.036193		0.424444	0.499533	0.076023
OR-54D		53.071	0.114	2.564	0.681	6.329	0.199	18.078	19.931	0.122	nd	101.111		1.9173	0.00309837	0.10917	0.0194515	0.0391331	0.152088	0.00608935	0.973628	0.771499	0.00854547	nd	4	0.0827031	0.0264673	0.257305	0.835841	0.864897	1.12572	0.0850518		0.406648	0.513188	0.0801638		0.39843	0.502817	0.0987534
OR-54D		52.529	0.062	2.622	0.643	6.052	0.192	18.273	20.066	0.139	nd	100.602		1.90308	0.00168984	0.111955	0.018418	0.0698501	0.113519	0.00589176	0.986912	0.77892	0.00976376	nd	4	0.0969197	0.0150357	0.615318	0.843312	0.896842	1.10043	0.103304		0.414462	0.525135	0.0604031		0.39961	0.506316	0.0940738
OR-54D		52.858	0.109	2.739	0.994	4.368	0.138	18.347	20.395	0.129	nd	100.13		1.91901	0.00297708	0.117196	0.0285317	0.0193728	0.11325	0.00424358	0.992985	0.79335	0.00908032	nd	4	0.0809873	0.036209	0.171062	0.882177	0.897626	1.10624	0.0841134		0.417644	0.522738	0.0596183		0.413427	0.517461	0.0691119
OR-54D		53.221	0.083	1.907	0.915	3.39	0.104	18.677	21.709	0.13	nd	100.192		1.92598	0.00225966	0.0813343	0.0261796	0.0451334	0.0574639	0.00318777	1.00759	0.841748	0.00912128	nd	4	0.0740227	0.0073116	0.785422	0.907586	0.946046	1.06506	0.0786246		0.441444	0.52842	0.0301362		0.431237	0.516202	0.0525617
OR-54D		53.018	0.078	2.391	0.828	4.364	0.158	18.1	21.643	0.119	nd	100.743		1.91511	0.00211964	0.10179	0.023647	0.0484289	0.0834042	0.00483409	0.974677	0.837651	0.00833418	nd	4	0.0848856	0.0169046	0.580654	0.880857	0.921174	1.05808	0.0889805		0.441861	0.514143	0.0439958		0.430855	0.501336	0.0678098
OR-54D		52.87	0.104	2.33	0.924	4.081	0.131	18.342	21.654	0.11	nd	100.592		1.91027	0.00282693	0.0992191	0.0263955	0.0559044	0.0674116	0.00400905	0.987966	0.838295	0.00770587	nd	4	0.0897335	0.00948559	0.829299	0.889033	0.936126	1.05538	0.0917855		0.442682	0.52172	0.0355984		0.429988	0.506759	0.0632527
OR-55A		52.495	0.126	2.343	0.604	5.74	0.22	17.92	20.193	0.237	nd	99.898		1.91543	0.00345872	0.100757	0.0174245	0.0608068	0.114351	0.00679919	0.974759	0.789448	0.0167664	nd	4	0.0845697	0.0161874	0.531758	0.847678	0.895005	1.08911	0.0944187		0.420242	0.518887	0.0608715		0.407065	0.502618	0.090317
OR-55A		52.589	0.141	2.604	0.72	5.098	0.16	17.785	20.813	0.151	nd	100.079		1.91514	0.00386296	0.111764	0.0207306	0.0401696	0.115095	0.00493527	0.965538	0.812107	0.0106617	nd	4	0.084864	0.0268996	0.349012	0.86147	0.893493	1.08063	0.0877998		0.429064	0.510127	0.0608088		0.420148	0.499525	0.0803269
OR-55A		52.971	0.127	2.368	0.738	5.62	0.182	18.199	20.311	0.122	nd	100.651		1.91881	0.00346095	0.101095	0.0211361	0.0417885	0.128466	0.00558408	0.982772	0.788315	0.00856838	nd	4	0.0811867	0.0199086	0.325288	0.852341	0.884394	1.11124	0.0828332		0.415	0.51737	0.0676297		0.406067	0.506233	0.0876995
OR-55A		53.094	0.132	2.256	0.583	5.769	0.191	17.828	20.428	0.179	nd	100.483		1.92873	0.00360742	0.0965873	0.0167444	0.0345978	0.140667	0.00587687	0.965472	0.795108	0.0126073	nd	4	0.0712685	0.0253189	0.245955	0.846358	0.87283	1.10614	0.076661		0.418203	0.50781	0.0739868		0.410729	0.498734	0.0905367
OR-55A		53.246	0.084	1.987	0.285	6.104	0.2	18.404	19.986	0.146	nd	100.484		1.93123	0.00229205	0.0849377	0.00817272	0.0501048	0.135048	0.00614418	0.995109	0.77669	0.010267	nd	4	0.0687662	0.0161715	0.371015	0.843126	0.880505	1.13016	0.0744491		0.407316	0.521861	0.0708227		0.396888	0.508499	0.0946129
OR-55A		53.531	0.111	1.726	0.484	5.071	0.179	18.499	20.361	0.13	nd	100.096		1.94535	0.00303468	0.0739244	0.0139063	0.0245592	0.129559	0.00550974	1.00219	0.792804	0.00915967	nd	4	0.0546498	0.0192746	0.18956	0.866716	0.885523	1.13175	0.0577401		0.411941	0.52074	0.067319		0.406751	0.514179	0.0790709
OR-55A		53.195	0.098	1.902	0.705	4.781	0.178	17.859	21.386	0.145	nd	100.266		1.93373	0.00268009	0.0814875	0.0202623	0.0356437	0.109706	0.00548065	0.967818	0.83297	0.0102197	nd	4	0.066267	0.0152205	0.324904	0.869427	0.898187	1.07752	0.0711265		0.435997	0.50658	0.0574226		0.428012	0.497302	0.074686
OR-55A		52.658	0.072	2.338	0.557	5.272	0.141	17.94	20.944	0.126	nd	100.071		1.91718	0.00197209	0.100322	0.0160334	0.0542431	0.106281	0.00434813	0.973712	0.817017	0.00889431	nd	4	0.0828243	0.0174979	0.510373	0.858474	0.901591	1.07999	0.0877744		0.430687	0.513288	0.0560257		0.418714	0.499019	0.0822673
OR-55A		53.38	0.068	1.999	0.591	5.887	0.213	18.24	19.457	0.254	nd	100.103		1.94304	0.00186213	0.0857573	0.0170085	0.0253532	0.153858	0.00656703	0.989781	0.758846	0.0179259	nd	4	0.0569586	0.0287986	0.164783	0.846696	0.865466	1.14364	0.0711603		0.398871	0.520257	0.0808723		0.393625	0.513415	0.0929598
OR-55A		53.198	0.056	1.848	0.361	5.456	0.171	18.221	20.082	0.11	nd	99.525		1.94678	0.00154172	0.0797035	0.0104448	0.0210224	0.145957	0.00530033	0.994039	0.787411	0.00780472	nd	4	0.0532247	0.0264788	0.144031	0.856178	0.871967	1.14	0.057946		0.408534	0.515739	0.0757272		0.404126	0.510174	0.0856995
OR-55A		52.792	0.094	2.19	0.645	4.982	0.162	18.872	19.621	0.131	nd	99.512		1.92552	0.00257931	0.0941408	0.0186	0.0403333	0.111634	0.00500472	1.02614	0.766786	0.00926391	nd	4	0.0744844	0.0196564	0.361299	0.871007	0.901884	1.13778	0.0785897		0.402605	0.538781	0.0586141		0.394256	0.527608	0.0781366
OR-55A		53.159	0.091	1.491	0.686	4.051	0.127	18.597	21.34	0.121	nd	99.676		1.93577	0.00249296	0.0639895	0.0197503	0.0482829	0.0750863	0.00391711	1.00955	0.832616	0.00854291	nd	4	0.0639895	0	0.643033	0.891105	0.930773	1.08464	0.0680333		0.434275	0.526562	0.0391634		0.423607	0.513627	0.0627661
OR-55A		53.231	0.015	1.976	0.62	4.403	0.136	17.557	21.891	0.168	nd	100.024		1.93897	0.000411049	0.0848295	0.0178555	0.0304271	0.103702	0.00419595	0.953381	0.854368	0.0118648	nd	4	0.0610347	0.0237948	0.293409	0.876664	0.901898	1.05708	0.0720774		0.446974	0.498773	0.054253		0.43997	0.490958	0.0690718
OR-55A		52.519	0.126	1.973	0.236	6.358	0.185	18.307	19.487	0.121	nd	99.332		1.92721	0.0034784	0.0853286	0.00684697	0.0550563	0.140064	0.00575003	1.00148	0.766181	0.00860879	nd	4	0.0727899	0.0125386	0.393081	0.836938	0.877303	1.14154	0.0744419		0.401621	0.524959	0.0734193		0.390356	0.510234	0.0994101
OR-55A		53.325	0.07	1.799	0.707	4.501	0.138	18.268	21.7	0.113	nd	100.636		1.92786	0.00190388	0.0766531	0.0202086	0.0515402	0.0845482	0.0042258	0.984567	0.840577	0.00792075	nd	4	0.0721444	0.00450863	0.609595	0.878564	0.920918	1.06912	0.0762574		0.440164	0.515563	0.0442732		0.428596	0.502015	0.0693892
OR-55A		52.628	0.106	2.419	0.708	5.49	0.18	17.925	20.206	0.14	nd	99.819		1.92239	0.00291291	0.104139	0.0204471	0.0347317	0.13298	0.00556906	0.976098	0.790821	0.00991507	nd	4	0.0776143	0.0265249	0.261179	0.853374	0.880098	1.10908	0.0817036		0.416244	0.513763	0.0699934		0.408771	0.50454	0.0866894
OR-55A		52.41	0.111	2.518	0.76	4.885	0.149	17.547	20.269	0.14	nd	98.797		1.93358	0.00308082	0.109486	0.0221684	0.00504815	0.145675	0.00465607	0.965074	0.801223	0.0100143	nd	4	0.0664248	0.0430609	0.0346535	0.864919	0.86885	1.11075	0.0702774		0.419056	0.504753	0.076191		0.417952	0.503424	0.0786237
OR-55A		52.509	0.131	2.496	0.829	5.769	0.166	18.328	20.381	0.142	nd	100.795		1.89897	0.00356411	0.106386	0.0237035	0.0748077	0.099675	0.00508484	0.988119	0.789738	0.00995671	nd	4	0.101034	0.00535147	0.750516	0.84992	0.90837	1.08779	0.103863		0.420626	0.526286	0.0530883		0.404509	0.50612	0.0893711
OR-55A		52.616	0.137	2.989	0.684	4.608	0.124	17.448	20.601	0.11	nd	99.319		1.93018	0.00378092	0.129229	0.0198385	0	0.141371	0.0038529	0.954192	0.809733	0.00782378	nd	4	0.0698218	0.0594073	0	0.87096	0.87096	1.09556	0.0792458		0.424991	0.50081	0.074199		0.424991	0.50081	0.074199
OR-55A		52.626	0.094	2.881	0.652	4.847	0.128	17.311	21.937	0.118	nd	100.606		1.9083	0.00256431	0.123124	0.0186925	0.0447507	0.102239	0.00393135	0.935792	0.85231	0.00829607	nd	4	0.0917001	0.0314243	0.437706	0.864248	0.901507	1.03803	0.0948676		0.450876	0.495039	0.0540851		0.440449	0.48359	0.0759602
OR-55A		52.694	0.128	2.294	0.45	5.778	0.188	18.401	19.348	0.123	nd	99.416		1.92944	0.00352596	0.0989964	0.0130274	0.030768	0.146168	0.00583062	1.00444	0.759069	0.00873214	nd	4	0.0705558	0.0284406	0.210497	0.850228	0.872964	1.15061	0.072236		0.397486	0.525973	0.0765409		0.391183	0.517633	0.0911834
OR-55A		52.87	0.091	2.251	0.765	4.375	0.143	17.872	20.851	0.182	nd	99.406		1.93463	0.00250511	0.0970774	0.0221321	0.0194387	0.114447	0.0044321	0.974926	0.817502	0.0129123	nd	4	0.0653731	0.0317043	0.169849	0.879253	0.894942	1.08937	0.0732752		0.428713	0.511269	0.0600181		0.424387	0.50611	0.0695036
OR-55A		52.785	0.048	2.149	0.593	5.875	0.193	18.621	19.455	0.124	nd	99.863		1.92392	0.00131618	0.092314	0.0170885	0.0488888	0.130193	0.00595826	1.01179	0.759769	0.00876279	nd	4	0.0760805	0.0162335	0.375509	0.849621	0.885994	1.14198	0.0822109		0.39951	0.53203	0.0684597		0.389497	0.518696	0.0918069
OR82		50.513	0.41	4.317	0.164	5.488	0.1	15.596	23.254	0.206	nd	100.048		1.84896	0.0112903	0.186235	0.00474617	0.103128	0.0648716	0.00310036	0.851039	0.912005	0.0146196	nd	4	0.151035	0.0352002	1.58972	0.835139	0.929173	0.91591	0.143074		0.498932	0.465579	0.0354894		0.472286	0.440715	0.0869993
OR82		51.329	0.499	3.803	0.13	5.233	0.106	16.165	23.54	0.2	nd	101.005		1.85868	0.0135937	0.162301	0.00372184	0.10348	0.0549945	0.00325112	0.872624	0.913316	0.0140415	nd	4	0.141325	0.0209767	1.88165	0.846305	0.940714	0.927618	0.128179		0.496116	0.474011	0.0298731		0.469713	0.448785	0.0815025
OR83A		50.75	0.548	3.641	0.259	5.866	0.126	16.155	22.226	0.32	nd	99.902		1.85917	0.0151029	0.157202	0.00750163	0.109487	0.0702315	0.00390966	0.882267	0.872404	0.0227288	nd	4	0.140834	0.0163682	1.55894	0.830771	0.926266	0.952498	0.133357		0.478055	0.48346	0.0384851		0.450997	0.456096	0.0929071
OR83A		50.87	0.518	4.03	0.239	5.47	0.142	15.9	22.275	0.295	nd	99.744		1.86619	0.0142962	0.174242	0.00693211	0.0788385	0.0889838	0.00441233	0.869564	0.875559	0.0209826	nd	4	0.133811	0.040431	0.885987	0.838226	0.907168	0.958548	0.126202		0.477376	0.474108	0.0485161		0.457702	0.454568	0.0877297
OR83A		50.314	0.578	4.205	0.24	5.454	0.116	16.085	20.766	0.335	nd	98.128		1.87333	0.0161901	0.184521	0.00706496	0.053562	0.116266	0.00365821	0.892805	0.828422	0.0241832	nd	4	0.126672	0.0578485	0.460686	0.840182	0.884779	1.00907	0.118475		0.450844	0.485882	0.0632741		0.438074	0.47212	0.0898058
OR83A		51.324	0.56	2.737	0	10.145	0.377	15.662	19.388	0.41	nd	100.606		1.8888	0.0155042	0.118712	0	0.101943	0.210294	0.0117515	0.859256	0.76449	0.0292545	nd	4	0.111204	0.0075074	0.484764	0.733471	0.803381	1.06955	0.109451		0.416834	0.468504	0.114662		0.394885	0.443834	0.161281
OR83A		50.788	0.588	3.196	0.04	8.411	0.22	15.235	20.376	0.417	nd	99.271		1.888	0.0164443	0.140024	0.00117564	0.0799639	0.181527	0.00692708	0.844295	0.811585	0.0300553	nd	4	0.111998	0.0280256	0.440506	0.763525	0.823042	1.02582	0.109165		0.441701	0.459503	0.0987953		0.42328	0.44034	0.13638
OR83A		50.799	0.606	3.162	0.023	8.908	0.239	15.222	20.472	0.395	nd	99.849		1.88066	0.0168781	0.137966	0.000673219	0.094643	0.181163	0.00749443	0.840111	0.812061	0.0283528	nd	4	0.119343	0.018623	0.52242	0.752844	0.822611	1.02127	0.113939		0.442942	0.458242	0.0988159		0.421198	0.435747	0.143054
OR83A		50.631	0.057	5.709	0.002	14.644	0.193	13.571	12.773	0.271	nd	97.867		1.94255	0.00164523	0.258149	6.0668e-05	0	0.469877	0.0062719	0.776209	0.525077	0.020159	nd	4	0.0574486	0.200701	0	0.622918	0.622918	1.24609	0.200761		0.296459	0.438248	0.265293		0.296459	0.438248	0.265293
OR83A		51.569	0.047	4.578	0.12	15.217	0.174	13.614	12.401	0.195	nd	97.915		1.98478	0.00136088	0.207661	0.00365157	0	0.489803	0.0056723	0.781125	0.511393	0.0145513	nd	4	0.015218	0.192443	0	0.61461	0.61461	1.27093	0.196094		0.286925	0.438263	0.274812		0.286925	0.438263	0.274812
OR83A		50.434	0.561	4.121	0.191	7.58	0.154	15.831	20.579	0.369	nd	99.824		1.85592	0.0155308	0.178728	0.00555702	0.0991499	0.134127	0.0048	0.868468	0.811396	0.0263272	nd	4	0.144085	0.0346433	0.739222	0.788266	0.86622	1.0026	0.13935		0.447299	0.478761	0.0739404		0.424117	0.453949	0.121934
Or83B-80 1.1mid sector zoned? altered?		52.722	0.46	1.986	0.155	6.288	0.173	16.189	21.217	0.278	0.025			1.94592	0.0127728	0.0863906	0.00452312	0.0127754	0.181319	0.00540835	0.890766	0.839056	0.019894	0.00117714	4	0.0540818	0.0323088	0.0704579	0.821088	0.830872	1.07208	0.0496073		0.439034	0.466091	0.0948749		0.436119	0.462996	0.100885
Or83B-80 1.2 edge		51.412	0.56	3.492	0.197	6.846	0.164	15.059	22.12	0.323	0.025			1.89054	0.015492	0.151339	0.00572746	0.0550627	0.155474	0.00510802	0.825523	0.871528	0.0230287	0.00117279	4	0.109456	0.0418833	0.35416	0.796791	0.841514	0.980997	0.102673		0.470454	0.44562	0.0839254		0.456875	0.432757	0.110368
Or83B-80 2.1 core		51.751	0.455	3.055	0.061	7.213	0.203	15.94	20.699	0.365	0.028			1.90558	0.0126042	0.132579	0.00177587	0.0566577	0.165464	0.00633125	0.874997	0.816641	0.0260582	0.00131529	4	0.0944236	0.0381551	0.342416	0.797541	0.84097	1.04046	0.0965886		0.439739	0.471163	0.0890982		0.426721	0.457214	0.116066
Or83B-80 2.2 core		51.416	0.501	3.262	0.323	6.55	0.155	15.646	21.495	0.369	0.021			1.89378	0.0138825	0.141602	0.00940606	0.0610019	0.140761	0.00483559	0.859104	0.848288	0.0263513	0.00098675	4	0.106219	0.0353837	0.433372	0.809813	0.85922	0.999865	0.105792		0.458992	0.464845	0.0761631		0.444326	0.449992	0.105682
Or83B-80 2.3 altered? edge		51.11	0.6	2.921	0.114	7.835	0.216	15.17	21.069	0.345	0.028			1.89782	0.0167609	0.127831	0.00334678	0.0658275	0.17748	0.00679342	0.839741	0.838237	0.0248377	0.00132637	4	0.102181	0.0256494	0.3709	0.775349	0.825524	1.01722	0.0948236		0.451768	0.452579	0.0956532		0.43629	0.437072	0.126638
Or83B-80 3.1 core		52.69	0.453	2.282	0.183	6.67	0.192	16.377	20.85	0.299	0.029			1.93399	0.012509	0.0987181	0.00531069	0.0256069	0.179141	0.00596917	0.896131	0.819986	0.0212785	0.00135794	4	0.0660086	0.0327095	0.142943	0.814014	0.833399	1.07527	0.0636271		0.432651	0.472828	0.0945209		0.426884	0.466525	0.106592
Or83B-80 3.2 mid		51.584	0.558	3.237	0.221	7.056	0.196	15.553	21.138	0.346	0.013			1.90027	0.0154644	0.140539	0.00643675	0.0468756	0.170508	0.00611565	0.854133	0.834331	0.0247127	0.000610943	4	0.0997284	0.040811	0.274916	0.797125	0.833592	1.02464	0.0941234		0.448813	0.459465	0.0917218		0.437774	0.448164	0.114062
Or83B-80 3.3 edge		51.565	0.555	3.1	0.169	7.806	0.216	15.416	20.963	0.389	0.019			1.89748	0.0153643	0.134443	0.00491681	0.0635943	0.176631	0.00673228	0.845678	0.826514	0.0277534	0.000891933	4	0.102519	0.0319245	0.360039	0.778778	0.827223	1.02231	0.100436		0.447049	0.457414	0.0955372		0.432183	0.442204	0.125614
Or83B-80 3.4 edge		50.84	0.73	3.463	0.097	8.646	0.221	15.15	20.53	0.365	0.019			1.87811	0.0202878	0.150772	0.00283309	0.076644	0.190471	0.00691501	0.83433	0.812602	0.0261428	0.000895416	4	0.121893	0.028879	0.402392	0.757487	0.814139	1.0248	0.108356		0.442256	0.454081	0.103663		0.424546	0.435899	0.139555
Or83B-80 4.1 middle		51.913	0.525	2.398	0.139	8.101	0.218	15.704	20.479	0.353	0.02			1.91796	0.0145922	0.104416	0.00406025	0.0526437	0.197662	0.00682192	0.864938	0.810675	0.0252862	0.00094265	4	0.0820378	0.0223784	0.266332	0.77556	0.813983	1.0626	0.0790823		0.432758	0.461725	0.105517		0.420929	0.449104	0.129967
BL123-1		50.917	0.392	2.924	0.054	6.711	0.178	15.262	21.454	0.192	nd	98.084		1.91102	0.0110684	0.129341	0.0016024	0.038846	0.171803	0.0056586	0.853936	0.862751	0.0139717	nd	4	0.0889771	0.0403636	0.226108	0.802131	0.832508	1.02574	0.0808119		0.456847	0.452179	0.0909736		0.447639	0.443065	0.109295
BL123-2 also replaced??		52.007	0.28	2.398	0.22	5.37	0.137	16.596	21.957	0.163	nd	99.128		1.91894	0.0077724	0.104281	0.00641795	0.0475324	0.118175	0.00428161	0.912881	0.868055	0.0116609	nd	4	0.0810575	0.0232232	0.40222	0.846366	0.885384	1.03106	0.0771736		0.457085	0.480689	0.0622266		0.445924	0.468951	0.0851248
BL123-3 also replaced??		52.794	0.1	1.353	0.648	2.669	0.64	17.702	22.352	0.152	nd	98.41		1.94841	0.00277647	0.0588502	0.0189079	0.0307486	0.0516296	0.0200061	0.973932	0.883865	0.0108764	nd	4	0.0515916	0.00725856	0.59556	0.922013	0.949657	1.02556	0.0569151		0.462896	0.510065	0.0270394		0.455559	0.501981	0.0424592
BL123-4also replaced??		53.051	0.118	1.465	0.312	3.511	0.09	17.49	22.668	0.15	nd	98.855		1.9508	0.00326437	0.063491	0.00907086	0.029996	0.077978	0.00280316	0.958783	0.893115	0.0106944	nd	4	0.0491961	0.0142949	0.384672	0.898783	0.924787	1.03676	0.0533618		0.462783	0.496811	0.0404057		0.455701	0.489207	0.0550924
BL123-5also replaced??		52.973	0.102	1.386	0.669	3.337	0.098	17.152	22.803	0.195	nd	98.715		1.95353	0.00282985	0.0602399	0.0195059	0.0214733	0.0814445	0.0030611	0.942956	0.901015	0.0139426	nd	4	0.046468	0.0137718	0.263655	0.901596	0.920495	1.0244	0.054751		0.467959	0.489742	0.0422997		0.462797	0.48434	0.0528627
920MB148 1.1c		54.211	0.101	1.096	0.477	3.462	0.096	17.836	22.5	0.222	0.014	100.062		1.96991	0.00276108	0.0469381	0.0137042	0.0102957	0.0949139	0.00295473	0.966203	0.876025	0.0156407	0.000649	4	0.0300852	0.0168529	0.108474	0.901803	0.910553	1.06112	0.0408528		0.452226	0.498777	0.0489969		0.449835	0.49614	0.0540246
920MB148 1.2e		53.646	0.116	1.382	0.5	3.744	0.096	17.777	22.446	0.244	0.007	99.968		1.95071	0.00317329	0.0592267	0.0143747	0.0361634	0.0776934	0.00295673	0.96366	0.874516	0.0172024	0.00032472	4	0.0492922	0.00993457	0.465463	0.894334	0.925392	1.04135	0.0604727		0.456459	0.502988	0.0405525		0.448003	0.49367	0.0583273
920MB148 1.3c		53.675	0.125	1.422	0.421	3.917	0.11	18.057	21.648	0.24	0.03	99.671		1.95601	0.00342694	0.0610737	0.0121299	0.0262694	0.0931079	0.0033953	0.98097	0.845262	0.0169572	0.00139469	4	0.0439874	0.0170862	0.282139	0.89151	0.913314	1.07408	0.0554855		0.440392	0.511098	0.0485103		0.434446	0.504197	0.0613572
920MB148 2.1c		51.834	0.393	3.148	0.18	6.255	0.185	15.675	21.906	0.291	0.022	99.926		1.90564	0.0108696	0.1364	0.00523205	0.0471257	0.145193	0.00576081	0.859101	0.862905	0.0207426	0.00103182	4	0.0943615	0.0420388	0.324573	0.817087	0.855428	1.00429	0.0943966		0.462139	0.460101	0.0777598		0.450762	0.448775	0.100463
920MB148 2.2c		51.418	0.337	3.348	0.167	6.417	0.196	15.762	21.865	0.325	0.017	99.878		1.88935	0.00931587	0.14499	0.00485162	0.0767826	0.120413	0.00610013	0.863413	0.860836	0.0231539	0.000796897	4	0.110652	0.0343372	0.637661	0.814073	0.877608	0.983826	0.115971		0.466663	0.46806	0.0652764		0.448015	0.449356	0.102629
920MB148 2.3c		50.91	0.461	4.295	0.141	6.255	0.127	15.188	22.026	0.319	0.021	99.759		1.87417	0.0127675	0.186348	0.00410393	0.0594223	0.133154	0.00396001	0.833524	0.868793	0.0227689	0.000986239	4	0.125827	0.060521	0.446268	0.812322	0.862256	0.966677	0.124047		0.473335	0.45412	0.0725448		0.458492	0.439879	0.101629
920MB148 3.1c		51.821	0.353	2.592	0	8.371	0.352	15.211	20.802	0.356	0.021	99.886		1.91713	0.00982467	0.113015	0	0.059596	0.199399	0.01103	0.838909	0.824566	0.0255353	0.000991111	4	0.082867	0.030148	0.298878	0.7641	0.807957	1.03831	0.089744		0.442631	0.45033	0.107039		0.42891	0.43637	0.13472
920MB148 3.2e		51.99	0.322	2.145	0.004	8.703	0.449	15.232	20.458	0.436	0.026	99.765		1.92684	0.00897799	0.0936932	0.000117209	0.0671094	0.202642	0.0140948	0.841577	0.812388	0.0313298	0.00122929	4	0.0731584	0.0205349	0.331172	0.757271	0.805939	1.04422	0.0877614		0.437566	0.453288	0.109146		0.422301	0.437475	0.140224
920MB148 4.1c		51.572	0.344	3.1	0	8.285	0.314	15.013	20.895	0.369	0.021	99.913		1.90671	0.00956812	0.135079	0	0.0598002	0.196372	0.00983302	0.827465	0.827728	0.026451	0.000990483	4	0.093287	0.041792	0.304525	0.7636	0.8082	1.02384	0.101592		0.447042	0.4469	0.106057		0.433056	0.432918	0.134026
920MB148 5.1c		50.852	0.568	3.552	0.078	6.583	0.147	15.064	22.131	0.316	0.026	99.327		1.88389	0.0158304	0.155087	0.00228463	0.067116	0.136841	0.00461265	0.831952	0.878461	0.0226975	0.00122879	4	0.116111	0.0389758	0.490466	0.803113	0.858751	0.968793	0.108376		0.475549	0.450372	0.0740783		0.458877	0.434583	0.10654
920MB148 5.2c		50.707	0.594	3.966	0.144	6.813	0.157	15.128	22.314	0.316	0.019	100.188		1.86302	0.0164185	0.171734	0.00418299	0.0886028	0.120739	0.0048858	0.828595	0.878419	0.0225103	0.000890553	4	0.136978	0.0347563	0.733835	0.798309	0.872817	0.949334	0.127542		0.4806	0.453341	0.0660589		0.45838	0.432381	0.10924
920MB148 5.3c		52.867	0.314	2.281	0.378	4.54	0.121	17.084	22.207	0.204	0.018	100.05		1.92821	0.00861583	0.0980507	0.0109002	0.0326513	0.105831	0.00373802	0.928904	0.86783	0.014426	0.000837529	4	0.0717852	0.0262655	0.308523	0.87026	0.897722	1.03474	0.0698171		0.456137	0.488238	0.0556255		0.448441	0.48	0.0715592
920MB148 5.4e		51.112	0.579	3.761	0.104	6.896	0.181	15.324	21.931	0.366	0.018	100.272		1.87467	0.0159763	0.162577	0.00301584	0.0799845	0.131543	0.00562298	0.837886	0.861855	0.0260272	0.00084223	4	0.12533	0.0372468	0.608047	0.798432	0.864308	0.969429	0.120247		0.470629	0.45754	0.0718312		0.450934	0.438392	0.110674
920MB148 6.1c		50.574	0.575	3.738	0.049	6.983	0.166	14.981	21.997	0.343	0.029	99.441		1.8725	0.0160162	0.163113	0.00143438	0.0844191	0.131805	0.00520581	0.826885	0.872632	0.0246225	0.00136977	4	0.127503	0.0356096	0.640485	0.792712	0.862516	0.95869	0.121463		0.476504	0.451524	0.0719726		0.455506	0.431627	0.112867
920MB148 6.2e		49.794	0.593	4.755	0.37	6.089	0.145	15.015	22.431	0.318	0.028	99.571		1.83705	0.0164587	0.206751	0.0107924	0.0995104	0.0883596	0.00453103	0.825808	0.886678	0.0227465	0.00131782	4	0.162954	0.0437977	1.1262	0.814665	0.903344	0.914168	0.154101		0.492368	0.458567	0.0490656		0.466585	0.434554	0.0988604
920MB148 7.1c		52.198	0.428	3.513	0.122	4.957	0.102	15.965	22.413	0.28	0.014	100.02		1.90914	0.0117768	0.151432	0.00352792	0.0237063	0.127919	0.00315988	0.870492	0.878333	0.0198558	0.000653235	4	0.0908554	0.0605767	0.185322	0.851655	0.871877	0.998411	0.0878109		0.468009	0.463831	0.0681602		0.462171	0.458045	0.079784
920MB148 7.2c		51.468	0.402	4.012	0.155	5.288	0.113	15.93	22.343	0.246	0.015	99.996		1.88315	0.0110655	0.173007	0.00448388	0.0522262	0.109585	0.00350197	0.868909	0.875918	0.0174513	0.000700157	4	0.116848	0.0561587	0.476582	0.843012	0.888007	0.978494	0.112869		0.472343	0.468563	0.0590941		0.459404	0.455728	0.0848671
920MB148 8.1c		52.336	0.527	2.774	0.311	6.853	0.191	16.916	20	0.331	0.021	100.287		1.91258	0.0144886	0.119476	0.00898574	0.0418297	0.167615	0.00591206	0.921569	0.783111	0.0234526	0.000979028	4	0.0874185	0.0320575	0.249559	0.814817	0.84611	1.08918	0.0828729		0.418263	0.492214	0.0895236		0.409122	0.481457	0.10942
920MB148 8.2c		52.046	0.507	3.075	0.146	7.183	0.203	16.996	19.604	0.34	0.011	100.136		1.90363	0.0139509	0.132555	0.00422205	0.0526758	0.167045	0.00628895	0.926731	0.768272	0.0241112	0.000513269	4	0.096365	0.03619	0.31534	0.808347	0.847277	1.09378	0.0930878		0.412595	0.497695	0.0897102		0.401244	0.484003	0.114753
920MB148 9.1c		52.226	0.316	2.972	0.434	4.635	0.119	16.33	22.738	0.23	0.03	100.045		1.90818	0.00868595	0.127979	0.0125371	0.0434357	0.0981931	0.0036827	0.889468	0.890143	0.0162932	0.00139833	4	0.0918158	0.0361627	0.44235	0.862643	0.90058	0.987661	0.0921354		0.474034	0.473675	0.0522915		0.463317	0.462966	0.0737174
920MB148 10.1c		52.667	0.288	2.945	0.185	4.412	0.099	16.394	22.925	0.245	0.021	100.193		1.91902	0.00789459	0.126468	0.00532949	0.0326624	0.101782	0.00305535	0.890504	0.895002	0.0173082	0.000976149	4	0.0809824	0.0454856	0.320904	0.868828	0.897426	0.992287	0.0834775		0.474226	0.471843	0.0539305		0.466159	0.463816	0.0700252
920MB148 11.1c		53.109	0.357	2.217	0.435	4.532	0.096	16.808	22.586	0.218	0.018	100.392		1.93285	0.00977451	0.0950933	0.0125168	0.0233621	0.114577	0.00295929	0.911919	0.880731	0.0153826	0.000835716	4	0.0671515	0.0279419	0.203899	0.868612	0.88838	1.0265	0.0638208		0.461786	0.478139	0.0600752		0.456198	0.472353	0.0714493
920MB150B 1.1c		53.834	0.141	1.438	0.321	4.065	0.133	17.498	22.067	0.304	0.017	99.818		1.96221	0.00386639	0.0617737	0.00925057	0.0190878	0.104826	0.00410608	0.9508	0.861801	0.0214836	0.000790488	4	0.0377854	0.0239883	0.182091	0.884701	0.900698	1.05563	0.0523267		0.449457	0.495873	0.05467		0.445027	0.490985	0.0639879
920MB150B 1.2c		53.942	0.109	1.146	0.389	3.802	0.117	17.429	22.602	0.279	0.018	99.856		1.96645	0.00298937	0.0492375	0.0112119	0.021225	0.0946892	0.00361267	0.947195	0.88283	0.0197199	0.000837115	4	0.0335481	0.0156894	0.224155	0.890967	0.909117	1.04188	0.0481263		0.458681	0.492122	0.0491965		0.453678	0.486755	0.0595672
920MB150B 2.1c		54.31	0.116	0.779	0.423	2.925	0.132	18.589	22.381	0.203	0.021	99.908		1.96917	0.00316417	0.0332887	0.012126	0.0251511	0.0635437	0.00405382	1.00478	0.869476	0.0142707	0.000971359	4	0.0308261	0.00246261	0.395808	0.918887	0.94052	1.06832	0.0397398		0.448693	0.518516	0.0327917		0.442943	0.511872	0.0451844
920MB150B 2.2c		54.464	0.091	0.932	0.368	2.799	0.073	18.206	22.624	0.225	0.026	99.816		1.97735	0.0024855	0.0398791	0.0105632	0.00691969	0.0780661	0.00224483	0.985372	0.880073	0.0158381	0.00120422	4	0.0226454	0.0172337	0.0886389	0.920601	0.926591	1.06344	0.0347167		0.452826	0.507006	0.0401676		0.45122	0.505207	0.0435728
920MB150B 3.1c		51.016	0.665	3.495	0.106	8.199	0.245	15.23	20.683	0.46	0.005	100.134		1.87996	0.0184357	0.15179	0.00308831	0.0814389	0.171241	0.00764704	0.836666	0.816637	0.0328657	0.000235054	4	0.120044	0.0317461	0.475581	0.768044	0.830102	1.00791	0.116273		0.447584	0.458562	0.0938541		0.42846	0.438968	0.132572
920MB150B 3.2e		52.42	0.334	3.026	0.009	5.921	0.161	16.358	21.934	0.289	0.019	100.495		1.90957	0.00915339	0.129916	0.000259212	0.0536717	0.126714	0.00496765	0.888341	0.856112	0.0204118	0.000882976	4	0.0904294	0.0394865	0.423565	0.831214	0.875165	1.01505	0.0934174		0.457528	0.474752	0.0677193		0.444771	0.461514	0.0937147
920MB150B 4.1c		51.141	0.604	2.866	0.005	8.022	0.234	15.273	21.038	0.381	0.016	99.584		1.89493	0.0168368	0.125157	0.000146477	0.0792839	0.169302	0.0073439	0.843645	0.835224	0.0273712	0.000756312	4	0.105067	0.0200904	0.4683	0.772406	0.832862	1.01295	0.0995207		0.451919	0.456476	0.0916049		0.43333	0.437699	0.128971
920MB150B 5.1c		51.017	0.597	3.41	0.293	6.996	0.176	15.432	21.41	0.36	0.029	99.733		1.8826	0.0165735	0.148304	0.00854839	0.0719271	0.143977	0.005501	0.848937	0.846513	0.0257567	0.0013652	4	0.117402	0.0309015	0.499573	0.797243	0.854996	0.992914	0.111377		0.460205	0.461523	0.0782727		0.442886	0.444155	0.112959
920MB150B 6.1c		52.164	0.215	2.865	0.332	4.357	0.153	16.737	22.675	0.204	0.022	99.744		1.90713	0.00591352	0.12345	0.00959671	0.0563435	0.0768756	0.00473792	0.912218	0.888243	0.0144606	0.0010261	4	0.0928651	0.0305845	0.732918	0.872571	0.922277	0.989094	0.0965247		0.47314	0.485911	0.0409493		0.459354	0.471752	0.068894
920MB150B 7.1c		53.163	0.16	2.068	0.31	3.994	0.07	17.081	22.804	0.203	0.007	99.86		1.9391	0.00439044	0.088899	0.00893979	0.0298544	0.0919795	0.0021626	0.928786	0.891203	0.0143559	0.000325721	4	0.0608962	0.0280028	0.324577	0.884036	0.909892	1.02077	0.066797		0.466118	0.485775	0.0481072		0.458952	0.478306	0.062742
920MB150B 8.1c		51.909	0.477	2.83	0.091	6.792	0.17	15.679	21.613	0.346	0.044	99.959		1.90917	0.0131982	0.122671	0.00264616	0.0566937	0.15222	0.00529585	0.859666	0.851706	0.024673	0.00206448	4	0.090835	0.031836	0.372446	0.804494	0.849568	1.01189	0.0911759		0.457024	0.461295	0.0816809		0.443531	0.447676	0.108793
920MB150B 9.1c		52.963	0.284	2.222	0.317	4.771	0.114	16.7	22.488	0.266	0.031	100.172		1.93157	0.00779207	0.0955073	0.00914052	0.0368808	0.108637	0.00352151	0.907956	0.878744	0.0188089	0.0014423	4	0.0684308	0.0270765	0.339487	0.861869	0.893136	1.01659	0.0730978		0.463635	0.479047	0.0573179		0.454785	0.469904	0.0753112
920MB150B 9.2e		51.813	0.533	2.302	0	8.621	0.231	15.038	20.57	0.403	0.019	99.53		1.9262	0.0149069	0.100861	0	0.0468697	0.221164	0.0072738	0.83342	0.819354	0.0290477	0.0009011	4	0.0737978	0.0270632	0.211923	0.756655	0.790283	1.05458	0.0739329		0.437236	0.444743	0.118021		0.426567	0.43389	0.139542
920MB151A 1.1c		52.197	0.428	2.755	0.212	6.133	0.179	16.306	21.175	0.318	0.021	99.748		1.91805	0.0118319	0.119314	0.0061592	0.0383993	0.150077	0.00557127	0.89325	0.833705	0.0226562	0.000984443	4	0.0819478	0.0373661	0.255864	0.825764	0.856156	1.04333	0.0819246		0.444161	0.475884	0.0799543		0.435257	0.466344	0.0983988
920MB151A 1.2e		51.694	0.399	2.685	0	8.17	0.357	15.256	21.018	0.402	0.014	100.011		1.90834	0.0110812	0.116819	0	0.0737756	0.178459	0.0111627	0.839588	0.831344	0.028773	0.000659325	4	0.0916624	0.0251568	0.413403	0.768978	0.824704	1.01805	0.0989324		0.449523	0.453981	0.0964963		0.432278	0.436566	0.131156
920MB151A 2.1e		52.425	0.188	2.371	0.525	3.369	0.078	17.119	22.903	0.204	0.017	99.206		1.92144	0.00518375	0.102418	0.0152133	0.0444077	0.0588585	0.00242142	0.935358	0.899405	0.0144965	0.000794867	4	0.0785574	0.0238603	0.754482	0.900574	0.940799	0.994217	0.0834813		0.474966	0.493952	0.0310825		0.464082	0.482634	0.0532841
920MB151A 2.2e		50.306	0.619	4.265	0.116	7.027	0.132	14.818	22.058	0.298	0.015	99.655		1.85974	0.0172155	0.185826	0.00339051	0.078932	0.138324	0.00413326	0.816645	0.873722	0.0213596	0.000707426	4	0.140256	0.0455698	0.570632	0.789868	0.855154	0.954969	0.127892		0.477786	0.446574	0.0756409		0.458016	0.428096	0.113888
920MB151A 3.1e		52.773	0.318	2.561	0.407	3.582	0.099	16.96	23.187	0.183	0.016	100.126		1.92016	0.00870463	0.109822	0.0117083	0.0343851	0.0746133	0.00305104	0.919947	0.903951	0.0129099	0.000742682	4	0.0798363	0.0299861	0.460844	0.894068	0.924979	0.994561	0.0760796		0.476137	0.484562	0.039301		0.467667	0.475942	0.0563912
920MB151A 4.1e		50.289	0.614	4.095	0.039	7.199	0.152	14.665	22.041	0.352	0.015	99.461		1.86364	0.0171181	0.178854	0.00114269	0.0844844	0.138631	0.00477111	0.810181	0.875175	0.0252916	0.000709148	4	0.136358	0.0424956	0.609419	0.784074	0.85389	0.948812	0.128123		0.479814	0.444181	0.0760045		0.458574	0.424518	0.116908
920MB151A 5.1c		51.276	0.387	3.449	0.112	5.041	0.091	15.804	22.522	0.245	0.015	98.964		1.89562	0.0107633	0.150274	0.00327362	0.0519612	0.103894	0.00284947	0.870992	0.892108	0.0175609	0.000707431	4	0.104384	0.0458906	0.500137	0.84822	0.89343	0.974886	0.101125		0.477831	0.466521	0.0556478		0.464893	0.453889	0.0812188
920MB151A 6.1c		52.498	0.207	2.503	0.888	3.778	0.097	16.711	22.842	0.246	0.008	99.815		1.91912	0.0056928	0.107839	0.0256653	0.0346838	0.0808181	0.00300342	0.910693	0.894679	0.0174357	0.000373083	4	0.0808823	0.0269563	0.42916	0.887446	0.91849	0.991511	0.0873054		0.474331	0.482822	0.0428473		0.465767	0.474104	0.0601299
920MB151A 7.1c		51.833	0.395	3.665	0.334	4.887	0.115	16.079	22.318	0.312	0.019	99.969		1.895	0.0108642	0.157918	0.00965434	0.0437054	0.105716	0.00356112	0.876339	0.874242	0.0221157	0.00088616	4	0.105002	0.0529158	0.413422	0.854331	0.892352	0.982055	0.106276		0.47096	0.47209	0.05695		0.460127	0.46123	0.0786428
920MB151A 7.2e		51.54	0.385	3.722	0.895	4.676	0.11	16.2	22.14	0.259	0.043	99.972		1.8852	0.0105943	0.160452	0.0258827	0.0424539	0.100585	0.00340794	0.883361	0.86769	0.0183678	0.00200649	4	0.114801	0.0456503	0.422068	0.86064	0.897773	0.983947	0.113987		0.468607	0.477071	0.0543225		0.458104	0.466378	0.0755188
920MB151A 8.1e		52.142	0.387	3.185	0.182	4.784	0.079	16.283	22.635	0.233	0.013	99.953		1.90658	0.0106457	0.137256	0.00526155	0.0401472	0.106147	0.0024467	0.887592	0.886794	0.0165184	0.000606412	4	0.0934159	0.0438405	0.378222	0.8585	0.893184	0.993739	0.0892492		0.471565	0.471989	0.0564453		0.461708	0.462124	0.076168
930MB260 1.1c		51.44	0.455	3.936	0	6.312	0.151	15.692	21.948	0.313	0.017	100.306		1.88139	0.0125195	0.169663	0	0.0655034	0.127566	0.0046778	0.855593	0.860097	0.0221956	0.000793201	4	0.118608	0.0510549	0.513486	0.81589	0.870249	0.983159	0.116558		0.466618	0.464175	0.0692069		0.450605	0.448246	0.101149
930MB260 1.2e		51.725	0.423	4.411	0.177	5.469	0.128	15.8	22.005	0.269	0.015	100.442		1.88543	0.0115997	0.189497	0.00510102	0.0310525	0.135667	0.0039519	0.858574	0.85942	0.0190111	0.000697521	4	0.114571	0.0749262	0.228888	0.837393	0.863547	0.994241	0.11108		0.463634	0.463178	0.0731887		0.455995	0.455546	0.0884588
930MB260 2.1c		52.085	0.216	3.003	0.034	5.62	0.162	15.595	22.455	0.312	0.022	99.504		1.91856	0.00598567	0.130368	0.000990182	0.0428707	0.130257	0.00505433	0.856364	0.886236	0.0222824	0.00103381	4	0.0814422	0.0489262	0.329124	0.831832	0.867977	0.986621	0.092787		0.4732	0.45725	0.06955		0.462611	0.447018	0.0903718
930MB260 3.1c		52.765	0.293	2.58	0.354	4.937	0.137	16.611	22.53	0.271	0.015	100.493		1.91875	0.00801563	0.110573	0.0101777	0.0455164	0.104626	0.00421968	0.900491	0.877826	0.0191067	0.000695858	4	0.0812477	0.0293249	0.435038	0.857093	0.895906	1.00512	0.085019		0.466199	0.478236	0.0555653		0.455195	0.466948	0.0778563
MMB903C 1.1c		50.316	0.516	4.881	0.14	5.537	0.103	14.981	22.662	0.306	0.019	99.462		1.85467	0.0143089	0.212043	0.00408002	0.0686824	0.102006	0.00321576	0.823212	0.89502	0.0218689	0.00089345	4	0.145331	0.0667125	0.67332	0.828264	0.88975	0.925218	0.139475		0.491705	0.452255	0.0560397		0.473826	0.435811	0.0903628
MMB903C 2.1c		52.19	0.505	2.589	0.011	7.961	0.22	15.59	20.988	0.363	0.014	100.431		1.91655	0.0139515	0.112052	0.000319375	0.0531171	0.191378	0.00684294	0.853475	0.825808	0.0258455	0.000655871	4	0.0834453	0.028607	0.277551	0.777321	0.816838	1.04485	0.0820435		0.441453	0.456242	0.102305		0.429264	0.443645	0.127091
MMB903C 2.2c		51.306	0.643	3.588	0.007	8.183	0.21	15.156	20.496	0.498	0.016	100.105		1.88997	0.0178194	0.155773	0.000203872	0.0647691	0.187327	0.00655226	0.832303	0.808964	0.035568	0.000751904	4	0.110033	0.0457407	0.345754	0.767524	0.816279	1.01963	0.110714		0.442397	0.45516	0.102443		0.427263	0.43959	0.133147
MMB903C 3.1c		52.084	0.281	3.269	0.181	4.147	0.127	16.471	23.036	0.231	0.033	99.86		1.90099	0.00771576	0.140619	0.00522309	0.0546318	0.0719518	0.00392613	0.896202	0.900858	0.0163468	0.00153655	4	0.0990112	0.0416081	0.759283	0.876236	0.925681	0.968154	0.101463		0.481997	0.479506	0.0384973		0.468308	0.465888	0.0658041
MMB903C 4.1c		52.166	0.505	2.094	0.002	8.077	0.315	15.767	20.637	0.355	0.024	99.953		1.92543	0.0140226	0.0910902	0	0.0564791	0.192842	0.00984775	0.867561	0.816133	0.0254046	0.00113008	4	0.0745691	0.0165211	0.292878	0.776771	0.818143	1.0604	0.0730586		0.434915	0.462321	0.102765		0.422207	0.448812	0.12898
MMB903C 5.1c		52.801	0.223	2.322	0.197	3.597	0.064	16.697	23.094	0.189	0.019	99.203		1.93854	0.00615935	0.100473	0.00571839	0.0187462	0.0916978	0.00199021	0.913866	0.908462	0.0134536	0.000889904	4	0.0614565	0.0390167	0.204434	0.892177	0.90881	1.00556	0.0634813		0.474634	0.477458	0.0479084		0.470031	0.472827	0.0571428
MMB903C 5.2c		52.136	0.367	2.827	0.275	3.792	0.086	16.419	23.118	0.209	0.023	99.292		1.91524	0.0101426	0.122395	0.00798713	0.0348259	0.0816728	0.00267589	0.89917	0.909932	0.0148859	0.00107788	4	0.0847649	0.0376305	0.426408	0.885299	0.916732	0.980843	0.0804435		0.481248	0.475556	0.0431954		0.472544	0.466956	0.0604999
MMB903C 6.1c		52.025	0.309	3.076	0.195	4.125	0.096	16.45	23.061	0.222	0.022	99.587		1.90466	0.0085106	0.132723	0.00564434	0.0520826	0.0742155	0.00297688	0.897804	0.904601	0.015758	0.0010275	4	0.0953428	0.0373801	0.701775	0.876674	0.923648	0.972019	0.0951071		0.482037	0.478415	0.0395475		0.46902	0.465496	0.0654835
MMB903C 6.2c		53.102	0.294	2.387	0.208	3.796	0.061	16.882	23.144	0.23	0.025	100.141		1.93151	0.00804508	0.102328	0.00598168	0.029962	0.085511	0.00187932	0.91542	0.901983	0.0162203	0.00116007	4	0.0684906	0.0338371	0.350387	0.887987	0.914569	1.00093	0.0697808		0.474001	0.481062	0.0449369		0.466653	0.473605	0.0597415
MMB903C 7.1c		49.876	0.888	4.421	0.014	8.494	0.209	14.32	20.679	0.472	0.014	99.391		1.85613	0.0248615	0.193907	0.000411926	0.0784139	0.185947	0.00658794	0.794458	0.824558	0.0340568	0.000664664	4	0.143867	0.0500396	0.421699	0.750324	0.810336	0.980406	0.128865		0.456828	0.440152	0.10302		0.437808	0.421826	0.140366
MMB903C 7.2c		50.019	0.941	4.431	0	8.656	0.283	14.256	20.602	0.444	0.017	99.671		1.8588	0.0263078	0.194068	0	0.0685084	0.200511	0.0089078	0.789781	0.820317	0.0319908	0.000805941	4	0.141198	0.0528705	0.341669	0.74592	0.797523	0.990292	0.121379		0.453061	0.436196	0.110742		0.436544	0.420294	0.143163
920MB172A 1.1c		50.919	0.778	3.231	0	7.975	0.217	14.722	21.068	0.415	0.02	99.358		1.89437	0.0217752	0.14167	0	0.056918	0.191215	0.00683804	0.816513	0.839814	0.0299349	0.000949231	4	0.105627	0.0360428	0.297665	0.766934	0.810251	1.00773	0.0929608		0.454557	0.441946	0.103497		0.440972	0.428737	0.130291
920MB172A 2.1c		52.356	0.362	2.284	0	8.539	0.335	15.515	20.57	0.409	0.012	100.408		1.92622	0.0100195	0.0990355	0	0.0582182	0.204515	0.0104393	0.850947	0.810865	0.0291748	0.000563219	4	0.0737774	0.0252581	0.284665	0.764085	0.806232	1.05546	0.0834764		0.434471	0.455947	0.109582		0.421328	0.442155	0.136517
920MB172A 2.2c		51.245	0.759	3.357	0.003	8.125	0.219	14.968	21.288	0.424	0.021	100.409		1.88527	0.0210068	0.145555	0	0.0730356	0.176949	0.0068242	0.820911	0.839133	0.0302435	0.000985593	4	0.114731	0.0308239	0.412749	0.766565	0.822671	0.99786	0.103947		0.456797	0.446878	0.0963254		0.43933	0.42979	0.13088
920MB172A 3.1c		51.468	0.604	2.739	0.001	7.74	0.212	15.254	20.955	0.359	0.019	99.359		1.91123	0.0168737	0.119874	0	0.0506273	0.189746	0.00666805	0.844445	0.833755	0.0258473	0.000900092	4	0.0887651	0.0311085	0.266816	0.778421	0.816527	1.03419	0.0817651		0.446349	0.452071	0.10158		0.43457	0.440142	0.125287
920MB172A 3.2c		52.413	0.449	1.764	0	8.327	0.337	15.672	20.573	0.367	0.025	99.945		1.93711	0.0124842	0.0768368	0	0.0514437	0.205935	0.0105495	0.863478	0.814682	0.0262982	0.00117873	4	0.062886	0.0139509	0.249805	0.770373	0.807432	1.06941	0.0653946		0.432399	0.458299	0.109302		0.420907	0.446118	0.132975
920MB172A 3.3e		51.996	0.484	2.201	0.014	8.093	0.346	15.565	20.717	0.373	0.032	99.834		1.92236	0.013462	0.0959049	0.00040923	0.0602791	0.189953	0.010835	0.857878	0.820667	0.0267374	0.00150929	4	0.0776352	0.0182697	0.317336	0.774181	0.818718	1.04783	0.078958		0.439212	0.459127	0.101661		0.425485	0.444778	0.129736
920MB172A 4.1e		50.281	0.776	3.866	0.02	7.963	0.184	14.758	21.588	0.388	0.024	99.871		1.85939	0.0215886	0.168494	0.00058475	0.0979139	0.148356	0.00576329	0.813589	0.855369	0.0278191	0.00113223	4	0.140609	0.0278845	0.659992	0.767639	0.845775	0.961945	0.126383		0.470677	0.447688	0.0816349		0.446615	0.4248	0.128585
920MB172A 4.2c		50.252	0.422	4.979	0.785	4.867	0.091	15.147	22.952	0.268	0.019	99.795		1.84543	0.0116588	0.215497	0.0227922	0.0675114	0.0819652	0.00283055	0.829241	0.903105	0.0190819	0.00089013	4	0.154573	0.0609238	0.823659	0.847273	0.910048	0.911206	0.151227		0.497767	0.457056	0.045177		0.47991	0.440659	0.0794318
920MB172A 4.3c		49.382	0.845	4.279	0.434	7.473	0.198	14.344	21.929	0.402	0.013	99.314		1.83752	0.0236547	0.187655	0.0127681	0.106843	0.125713	0.00624044	0.795692	0.874292	0.0290024	0.000617111	4	0.162478	0.0251772	0.849895	0.773833	0.863564	0.921405	0.144788		0.486882	0.44311	0.0700079		0.45954	0.418226	0.122234
920MB172A 5.1e		51.263	0.73	3.196	0.019	8.236	0.294	15.03	20.843	0.433	0.026	100.077		1.89263	0.020276	0.139067	0.000554613	0.0667773	0.187523	0.00919382	0.827242	0.824512	0.0309952	0.00122459	4	0.107366	0.0317015	0.356102	0.764872	0.815205	1.01476	0.0990334		0.448281	0.449765	0.101955		0.432575	0.434007	0.133417
920MB172A 6.1e		51.491	0.667	2.972	0.003	7.68	0.226	15.01	21.423	0.444	0.031	99.953		1.90104	0.018526	0.129319	8.75699e-05	0.0647039	0.172428	0.00706731	0.826135	0.84745	0.0317824	0.00146008	4	0.0989602	0.0303592	0.375252	0.776978	0.827324	0.998563	0.0951506		0.45907	0.447524	0.0934055		0.443525	0.432369	0.124106
920MB172A 6.2c		51.597	0.608	2.993	0.027	7.661	0.233	15.271	21.033	0.393	0.021	99.856		1.90575	0.0168943	0.130287	0.000788457	0.0527775	0.183866	0.00728924	0.84085	0.832369	0.0281434	0.000989501	4	0.0942545	0.0360328	0.287044	0.780376	0.820569	1.02472	0.0895987		0.448213	0.45278	0.0990078		0.435827	0.440267	0.123906
Rattlesnake Creek terrane cover sequence
KM85B 1.1		51.691	0.508	2.512	0.001	8.598	0.283	15.204	20.4	0.478	0.025	99.705		1.91542	0.0141615	0.109704	0	0.0666189	0.199831	0.00888224	0.839882	0.809943	0.0343417	0.00118181	4	0.0845761	0.0251284	0.333376	0.759159	0.807802	1.03971	0.0917765		0.437888	0.454075	0.108037		0.422665	0.438289	0.139046
KM85B 2.1		50.884	0.556	3.322	0	9.06	0.308	15.12	20.132	0.55	0.025	99.992		1.87999	0.0154542	0.144653	0	0.105042	0.174901	0.00963852	0.832791	0.796956	0.0393986	0.00117834	4	0.120013	0.0246398	0.600579	0.748419	0.826434	1.00769	0.129682		0.441613	0.46147	0.0969171		0.417322	0.436087	0.146591
KM85B 2.2		49.094	0.561	5.397	0.03	7.96	0.141	14.388	21.993	0.343	0.029	99.947		1.81171	0.0155747	0.234729	0.000875296	0.135736	0.109928	0.00440722	0.791537	0.869598	0.0245413	0.00136526	4	0.188291	0.0464378	1.23476	0.763147	0.878056	0.901465	0.183049		0.491003	0.446927	0.0620691		0.456051	0.415113	0.128836
KM85B 3.1		51.23	0.353	3.39	0.034	6.937	0.163	15.809	21.933	0.27	0.025	100.144		1.87861	0.00973833	0.14651	0.000985747	0.0961701	0.116572	0.00506275	0.864227	0.861757	0.0191964	0.00116952	4	0.121388	0.0251217	0.824988	0.802462	0.881146	0.980798	0.122278		0.467697	0.469037	0.0632663		0.444497	0.445771	0.109733
KM85B 3.2		51.21	0.452	2.903	0.027	7.877	0.259	15.4	20.794	0.399	0.012	99.333		1.89972	0.0126145	0.126922	0.000791904	0.0768822	0.167497	0.00813806	0.85166	0.826508	0.028698	0.000567901	4	0.10028	0.0266424	0.459006	0.777034	0.835651	1.01916	0.104316		0.44781	0.461438	0.0907515		0.429903	0.442985	0.127112
KM85B 4.1		50.662	0.531	3.594	0.008	8.919	0.293	14.926	20.067	0.509	0.017	99.535		1.88035	0.0148268	0.157213	0.000234758	0.0896347	0.187213	0.00921106	0.825867	0.798018	0.0366284	0.000804936	4	0.119651	0.0375617	0.478785	0.74894	0.815204	1.01308	0.127431		0.440627	0.456004	0.10337		0.419848	0.434499	0.145653
KM85B 4.2		50.488	0.535	3.614	0.013	9.038	0.287	14.749	19.994	0.498	0.022	99.259		1.88098	0.014995	0.158686	0.000382924	0.086004	0.195598	0.00905656	0.81916	0.798122	0.0359724	0.00104562	4	0.119022	0.0396635	0.439698	0.744175	0.807246	1.01476	0.12605		0.440251	0.451856	0.107894		0.420311	0.43139	0.148299
KM85B 5.1		52.75	0.178	2.427	0.249	4.575	0.143	16.732	22.702	0.229	0.017	100.008		1.9248	0.0048863	0.104373	0.0071835	0.0460657	0.0935462	0.00441962	0.910168	0.887567	0.016201	0.000791349	4	0.0752011	0.0291717	0.492438	0.867008	0.9068	1.00371	0.0824209		0.469294	0.481244	0.0494618		0.458135	0.469801	0.0720634
92KM6 1.1 RCt		51.793	0.521	2.978	0.158	7.924	0.186	15.611	20.858	0.334	0.009	100.372		1.90269	0.0143989	0.128936	0.00458909	0.0565177	0.186932	0.00578755	0.854943	0.820999	0.0237896	0.000421789	4	0.0973148	0.0316215	0.302344	0.778359	0.820581	1.04187	0.0927283		0.440716	0.458938	0.100346		0.427739	0.445424	0.126837
92KM6 1.2		51.544	0.51	3.086	0.114	8.253	0.229	15.668	20.429	0.362	0.026	100.232		1.89618	0.0141146	0.133799	0.00331574	0.0693294	0.184582	0.00713549	0.859264	0.805236	0.0258199	0.0012202	4	0.103817	0.0299824	0.375602	0.771903	0.823171	1.04385	0.102627		0.435479	0.464697	0.0998237		0.419741	0.447904	0.132355
92KM6 1.3		50.81	0.644	4.005	0.112	8.592	0.224	14.969	20.73	0.341	0.027	100.468		1.86972	0.0178283	0.173694	0.00325851	0.073546	0.190871	0.00698171	0.821166	0.817337	0.0243291	0.0012675	4	0.130279	0.0434147	0.385317	0.756428	0.811399	1.01204	0.120219		0.446785	0.448878	0.104337		0.429517	0.431529	0.138954
92KM6 2.1		51.396	0.465	3.324	0.424	7.081	0.186	15.711	20.653	0.295	0.021	99.604		1.89956	0.0129293	0.14479	0.0123898	0.0399679	0.178902	0.00582268	0.865642	0.817864	0.0211393	0.000990147	4	0.100439	0.0443518	0.223406	0.798186	0.828727	1.04454	0.0967095		0.439143	0.464797	0.0960597		0.429917	0.455032	0.115051
92KM6 2.2		51.442	0.704	3.425	0.083	9.04	0.233	15.319	20.011	0.36	0.02	100.642		1.89068	0.0194657	0.148359	0.00241186	0.0555342	0.222332	0.0072534	0.839345	0.788029	0.0256535	0.000937748	4	0.109323	0.0390366	0.24978	0.751286	0.790584	1.06168	0.0969827		0.426029	0.453772	0.120199		0.413611	0.440545	0.145843
92KM6 3.1		51.447	0.456	3.221	0.021	8.554	0.168	15.392	20.107	0.397	0.025	99.803		1.90209	0.0126833	0.140352	0.000613854	0.0591172	0.205373	0.00526099	0.848355	0.796514	0.0284582	0.00117915	4	0.097906	0.0424456	0.287853	0.76233	0.805099	1.05373	0.102177		0.430492	0.45851	0.110998		0.417163	0.444314	0.138523
92KM6 4.1		56.579	0	20.345	0.001	5.978	0.078	5.233	0.276	4.561	3.027	96.078		2.12653	0	0.901216	0	0	0.187906	0.00248312	0.293209	0.0111148	0.332369	0.145139	4	0	0.901216	0	0.609437	0.609437	0.481116	0.901246		0.0225804	0.595675	0.381744		0.0225804	0.595675	0.381744
92KM6 5.1		51.664	0.474	3.276	0.115	7.305	0.183	15.383	21.555	0.315	0.018	100.288		1.8977	0.0130983	0.14182	0.00333973	0.0565227	0.16788	0.00569346	0.842347	0.848323	0.0224333	0.000843467	4	0.102301	0.039519	0.336685	0.789639	0.83382	1.01023	0.0993814		0.456444	0.453228	0.0903284		0.442972	0.439851	0.117177
92KM6 5.2		51.69	0.684	3.103	0.109	7.482	0.175	15.372	20.806	0.428	0.028	99.902		1.90689	0.0189833	0.134914	0.00317922	0.0420869	0.18875	0.00546819	0.845397	0.822398	0.0306131	0.00131775	4	0.0931078	0.0418059	0.222977	0.785514	0.817482	1.03415	0.087072		0.442972	0.45536	0.101667		0.433153	0.445266	0.121581
92KM6 6.1		51.604	0.587	2.938	0.023	9.207	0.268	15.075	20.001	0.387	0.024	100.15		1.90882	0.0163349	0.128082	0.000672642	0.0498164	0.235003	0.00839659	0.831286	0.792699	0.0277548	0.00113253	4	0.0911769	0.0369053	0.211982	0.74481	0.779607	1.06629	0.0873943		0.426414	0.447171	0.126414		0.415286	0.435501	0.149213
92KM6 6.2		51.492	0.577	3.03	0	9.308	0.267	14.952	19.749	0.386	0.034	99.795		1.91154	0.0161145	0.132569	0	0.0415098	0.247471	0.0083954	0.827474	0.785531	0.0277828	0.0016102	4	0.0884574	0.0441115	0.167736	0.741162	0.769783	1.07494	0.0856214		0.422221	0.444765	0.133015		0.413006	0.435058	0.151936
92KM6 7.1		51.792	0.572	3.011	0.117	7.795	0.191	15.503	20.749	0.317	0.014	100.066		1.90903	0.0158615	0.130803	0.00340966	0.0393106	0.200979	0.00596307	0.851878	0.819449	0.0226545	0.000658317	4	0.0909665	0.0398361	0.195596	0.779988	0.809111	1.05286	0.0825564		0.437668	0.454988	0.107343		0.428668	0.445632	0.1257
92KM6 7.2		51.838	0.565	2.958	0.122	8.254	0.244	15.451	20.616	0.381	0.023	100.465		1.905	0.0156204	0.128115	0.0035447	0.0553306	0.198345	0.0075949	0.846473	0.811754	0.0271466	0.00107828	4	0.0950029	0.0331118	0.278961	0.769417	0.810163	1.04482	0.0919871		0.437233	0.455933	0.106834		0.424579	0.442739	0.132682
																															0
BL136-1, RCt		51.848	0.281	1.384	0	9.628	0.323	14.701	20.821	0.311	nd	99.297		1.94108	0.00791433	0.0610663	0	0.0635225	0.237928	0.0102424	0.820481	0.835193	0.0225744	nd	4	0.0589215	0.0021448	0.266982	0.731311	0.775202	1.05841	0.0656673		0.44106	0.433291	0.125648		0.426745	0.419228	0.154027
BL136-2		51.687	0.28	1.551	0	9.674	0.31	14.669	20.25	0.292	nd	98.713		1.9466	0.00793323	0.0688433	0	0.0434149	0.261283	0.00988878	0.823581	0.817136	0.0213217	nd	4	0.0534015	0.0154418	0.16616	0.729944	0.759156	1.08486	0.0588567		0.429619	0.433008	0.137373		0.420032	0.423345	0.156624
BL136-3		51.269	0.331	1.937	0.147	8.859	0.271	14.945	20.465	0.329	nd	98.553		1.9274	0.00936142	0.0858225	0.00436926	0.0602655	0.218263	0.00862924	0.837575	0.824333	0.0239804	nd	4	0.0725999	0.0132227	0.276114	0.750445	0.79328	1.05584	0.0778575		0.438435	0.445478	0.116087		0.424818	0.431642	0.143539
BL136-4		51.555	0.368	1.461	0.008	9.289	0.294	14.778	20.804	0.256	nd	98.813		1.93825	0.0104084	0.0647356	0.000237795	0.0563756	0.235687	0.00936207	0.828256	0.83803	0.0186605	nd	4	0.0617526	0.00298299	0.239197	0.739304	0.778478	1.06394	0.0595963		0.440611	0.435472	0.123917		0.427927	0.422936	0.149137
BL136-5center		51.668	0.322	1.499	0.003	8.992	0.352	14.337	21.181	0.3	nd	98.654		1.94704	0.00912863	0.0665747	8.93815e-05	0.0429215	0.240464	0.0112352	0.805419	0.855211	0.0219189	nd	4	0.052962	0.0136127	0.178495	0.739728	0.770085	1.04588	0.0566236		0.449852	0.423661	0.126487		0.43992	0.414307	0.145773
BL136-6		51.29	0.369	1.859	0.018	9.422	0.274	14.568	20.949	0.309	nd	99.058		1.92373	0.010412	0.082176	0.000533773	0.0714834	0.224061	0.00870457	0.814557	0.841876	0.0224705	nd	4	0.0762733	0.00590267	0.319036	0.733768	0.78427	1.03862	0.0779198		0.447689	0.433161	0.11915		0.431294	0.417298	0.151408
Forks of Salmon pluton
KM45	cpx1a	53.43	0.05	0.9	nd	6.42	0.42	14.52	22.99	0.31	nd	99.04		1.9949	0.00140444	0.0396035	0	0	0.200466	0.0132823	0.808191	0.919708	0.022441	nd	4	0.00509602	0.0345075	0	0.801255	0.801255	1.00866	0.0345075		0.476937	0.419107	0.103956		0.476937	0.419107	0.103956
KM45	cpx1b	53.46	0.21	1.44	nd	7.34	0.42	15	21.46	0.31	nd	99.64		1.98431	0.00586404	0.0629938	0	0	0.227848	0.0132043	0.830008	0.853462	0.0223093	nd	4	0.0156901	0.0473037	0	0.784614	0.784614	1.05786	0.0473037		0.446531	0.43426	0.11921		0.446531	0.43426	0.11921
KM45	cpx2oc	53.03	0.16	1.34	nd	7.52	0.41	14.92	21.89	0.31	nd	99.58		1.97021	0.00447207	0.0586747	0	0.0142854	0.219371	0.0129021	0.826363	0.871388	0.0223305	nd	4	0.0297869	0.0288878	0.0651197	0.779574	0.790223	1.04573	0.0431732		0.454529	0.431044	0.114427		0.451167	0.427856	0.120977
KM45	cpx2rpl	52.9	0.18	1.3	nd	7.47	0.38	15.06	22.23	0.32	nd	99.84		1.95878	0.00501417	0.0567319	0	0.0386576	0.192665	0.0119179	0.831314	0.881948	0.0229733	nd	4	0.0412223	0.0155097	0.200646	0.782312	0.811847	1.02398	0.0541672		0.46274	0.436173	0.101087		0.453541	0.427502	0.118957
KM45	cpx3nc	51.89	0.41	2.4	nd	7.99	0.41	15.06	20.64	0.32	nd	99.12		1.93542	0.0115046	0.105501	0	0.0237837	0.22545	0.0129528	0.83739	0.824852	0.0231412	nd	4	0.0645766	0.0409248	0.105494	0.770635	0.787879	1.06284	0.0647086		0.436963	0.443605	0.119432		0.431526	0.438086	0.130388
KM45	cpx3r	52.23	0.36	2.31	nd	8.05	0.34	14.93	20.8	0.36	nd	99.38		1.94371	0.0100789	0.101316	0	0.0170778	0.233462	0.0107171	0.82829	0.829372	0.0259752	nd	4	0.0562882	0.0450279	0.0731505	0.767767	0.780117	1.06175	0.0621057		0.43856	0.437988	0.123451		0.434635	0.434068	0.131296
KM46	cpx1nc	52.63	0.16	1.26	nd	8.55	0.58	14.2	20.86	0.3	nd	98.54		1.98645	0.00454318	0.0560491	0	0	0.269884	0.018542	0.798992	0.84359	0.0219538	nd	4	0.0135546	0.0424945	0	0.747506	0.747506	1.06888	0.0424945		0.441101	0.417781	0.141118		0.441101	0.417781	0.141118
KM46	cpx1r	52.2	0.27	1.79	nd	8.88	0.5	13.85	20.67	0.32	nd	98.48		1.97396	0.00768118	0.0797766	0	0	0.280833	0.0160149	0.780779	0.837495	0.0234618	nd	4	0.0260414	0.0537352	0	0.735465	0.735465	1.06161	0.0537352		0.440994	0.411129	0.147877		0.440994	0.411129	0.147877
KM46	cpx2r1	52.51	0.26	1.92	nd	9.55	0.51	12.99	21.13	0.41	nd	99.28		1.97802	0.00736815	0.0852402	0	0	0.300857	0.0162721	0.729471	0.852829	0.0299445	nd	4	0.0219817	0.0632584	0	0.707999	0.707999	1.03033	0.0632584		0.452872	0.387366	0.159762		0.452872	0.387366	0.159762
KM46	cpx2r2	52.88	0.34	1.98	nd	8.29	0.47	13.41	21.6	0.38	nd	99.35		1.9829	0.00959148	0.0875044	0	0	0.259976	0.0149277	0.749634	0.867836	0.0276273	nd	4	0.0170972	0.0704072	0	0.742499	0.742499	1.00961	0.0704072		0.462243	0.399284	0.138473		0.462243	0.399284	0.138473
KM49A	cpx1a	53.2	0.07	0.63	nd	9.12	0.6	13.06	22.96	0.28	nd	99.92		1.99356	0.00197339	0.0278236	0	0.00144403	0.284369	0.0190439	0.729579	0.921859	0.0203433	nd	4	0.00643559	0.021388	0.00507803	0.71852	0.719543	1.01395	0.0228321		0.476214	0.376886	0.146899		0.475859	0.376605	0.147535
KM49A	cpx1b	52.99	0.05	0.68	nd	9.02	0.57	13.02	22.53	0.27	nd	99.13		2.00097	0.00142041	0.0302629	0	0	0.284854	0.0182309	0.73294	0.911553	0.0197676	nd	4	0	0.0302629	0	0.720126	0.720126	1.01779	0.0302629		0.472467	0.37989	0.147642		0.472467	0.37989	0.147642
KM49A	cpx2nc	50.4	0.77	4.3	nd	7.93	0.31	13.62	20.96	0.48	nd	98.77		1.89057	0.0217296	0.190102	0	0.0202012	0.228573	0.00984942	0.761642	0.84242	0.0349099	nd	4	0.109426	0.0806757	0.08838	0.753791	0.769169	0.990215	0.100877		0.459677	0.4156	0.124724		0.454665	0.411068	0.134267
KM49A	cpx2ncb	51	0.67	3.65	nd	7.92	0.34	14.07	21.02	0.36	nd	99.03		1.9081	0.0188583	0.160946	0	0.0112475	0.236566	0.0107745	0.784759	0.842633	0.0261143	nd	4	0.0918977	0.0690479	0.0475448	0.760004	0.768373	1.02132	0.0802954		0.452066	0.421018	0.126916		0.449355	0.418492	0.132153
KM49A	cpx3r	52.58	0.14	1.2	nd	9.93	0.54	13.61	20.94	0.33	nd	99.27		1.97991	0.00396597	0.0532551	0	0.00308527	0.309625	0.0172228	0.764001	0.844842	0.0240926	nd	4	0.0200899	0.0331652	0.00996454	0.709569	0.711608	1.07363	0.0362505		0.440373	0.398235	0.161392		0.439666	0.397595	0.162738
KM49C	cpx1a	53.9	0.08	0.39	nd	7.61	1.02	13.64	22.82	0.43	nd	99.89		2.00995	0.00224431	0.0171402	0	0	0.237328	0.0322168	0.758265	0.91177	0.0310891	nd	4	0	0.0171402	0	0.761621	0.761621	0.995593	0.0171402		0.478027	0.397546	0.124427		0.478027	0.397546	0.124427
KM49C	cpx1b	54.02	0.15	0.43	nd	6.85	0.82	13.79	23.31	0.27	nd	99.64		2.01718	0.00421385	0.018924	0	0	0.213919	0.0259352	0.767654	0.932624	0.0195478	nd	4	0	0.018924	0	0.782065	0.782065	0.981573	0.018924		0.487214	0.401032	0.111754		0.487214	0.401032	0.111754
KM45	opx1c	53.14	0.19	1.66	nd	16.65	0.75	25.57	1.19	0.04	nd	99.19		1.94526	0.00523247	0.0716174	0	0.0302384	0.47949	0.0232543	1.3954	0.0466742	0.00283897	nd	4	0.0547409	0.0168766	0.0630636	0.732444	0.744257	1.87489	0.0471149		0.0242898	0.726179	0.249532		0.0239134	0.714928	0.261158
KM45	opx1r	53.87	0.23	1.68	nd	16.91	0.76	25.68	1.07	0.02	nd	100.22		1.95399	0.00627624	0.071819	0	0.00905782	0.503906	0.0233493	1.38861	0.0415846	0.00140653	nd	4	0.0460114	0.0258076	0.0179752	0.730243	0.733738	1.89252	0.0348654		0.0215007	0.717962	0.260538		0.0214005	0.714615	0.263984
KM45	opx1e	53.29	0.14	1.47	nd	16.63	0.75	24.59	0.99	0.01	nd	97.87		1.98456	0.00392233	0.0645195	0	0	0.51794	0.0236574	1.36517	0.0395028	0.000722043	nd	4	0.0154383	0.0490812	0	0.724956	0.724956	1.88311	0.0490812		0.0205464	0.71006	0.269393		0.0205464	0.71006	0.269393
KM45	opx2a	52.66	0.18	1.85	nd	16.84	0.83	25.46	1.23	0.02	nd	99.07		1.93117	0.00496602	0.0799586	0	0.0491976	0.467277	0.0257812	1.3919	0.0483301	0.00142204	nd	4	0.0688331	0.0111255	0.105286	0.729364	0.748664	1.85918	0.0603231		0.0253368	0.729696	0.244968		0.0246998	0.711349	0.263951
KM45	opx2b	53.7	0.1	1.69	nd	16.59	0.71	25.35	1.14	0.03	nd	99.31		1.96499	0.00275285	0.0728833	0	0	0.507693	0.0220055	1.38285	0.0446957	0.00212839	nd	4	0.0350085	0.0378748	0	0.731457	0.731457	1.89054	0.0378748		0.0230957	0.714563	0.262341		0.0230957	0.714563	0.262341
*apfu = atoms per formula unit based on 6 oxygens
**Fe3+ calculated according to Droop (1987)
Droop, G.T.R. (1987) Mineralogical Magazine, 51, 431–435.
